# Supplementary material for: A comprehensive study on the effect of backbone stereochemistry of a cyclic hexapeptide on membrane permeability and microsomal stability
Source: Royal Society of Chemistry journal article supplement (doi:10.1039/d1ob02090k), 2021-01-01
Supplement: d1ob02090k1.csv [file d1ob02090k1.csv]

scaffold	Compound	R1	R2	R3	R4	R5	R6	Molecular Mass	Exact Mass	Calcd [M+Na]+	Obserbed	SMILES	ALogP	Pe [cm/s]	LogPe [cm/s]	stability [%]	CLint [μL/min/mg]
CHP19L	CHP19L_sub1_1	D-Pro	D-Tyr	L-Ala	L-Abu	D-Ala	L-Leu	600.717	600.3271	623.3169	623.1869	O=C([C@H]1CCCN1C([C@@H]2CC(C)C)=O)N[C@H](CC(C=C3)=CC=C3O)C(N[C@H](C(N[C@H](C(N[C@@H](C(N2)=O)C)=O)CC)=O)C)=O	0.79	1.56.E-08	-7.81	99%	0.9
CHP19L	CHP19L_sub1_2	D-Pro	D-Tyr	L-Ala	L-Abu	D-Leu	L-Leu	642.798	642.374	665.3638	665.2443	O=C([C@H]1CCCN1C([C@@H]2CC(C)C)=O)N[C@H](CC(C=C3)=CC=C3O)C(N[C@H](C(N[C@H](C(N[C@@H](C(N2)=O)CC(C)C)=O)CC)=O)C)=O	1.61	2.33.E-07	-6.63	101%	-0.8
CHP19L	CHP19L_sub1_3	D-Pro	D-Tyr	L-Ala	L-Abu	D-Nal	L-Leu	726.875	726.374	749.3638	749.2616	O=C([C@H]1CCCN1C([C@@H]2CC(C)C)=O)N[C@H](CC(C=C3)=CC=C3O)C(N[C@H](C(N[C@H](C(N[C@@H](C(N2)=O)CC4=CC(C=CC=C5)=C5C=C4)=O)CC)=O)C)=O	3.05	3.71.E-06	-5.43	78%	41.8
CHP19L	CHP19L_sub1_4	D-Pro	D-Tyr	L-Ala	L-Abu	D-Thi	L-Leu	682.837	682.3148	705.3046	705.2166	O=C([C@H]1CCCN1C([C@@H]2CC(C)C)=O)N[C@H](CC(C=C3)=CC=C3O)C(N[C@H](C(N[C@H](C(N[C@@H](C(N2)=O)CC4=CC=CS4)=O)CC)=O)C)=O	1.96	2.86.E-07	-6.54	95%	9.4
CHP19L	CHP19L_sub1_5	D-Pro	D-Tyr	L-Ala	L-Nva	D-Ala	L-Leu	614.744	614.3428	637.3326	637.2088	O=C([C@H]1CCCN1C([C@@H]2CC(C)C)=O)N[C@H](CC(C=C3)=CC=C3O)C(N[C@H](C(N[C@H](C(N[C@@H](C(N2)=O)C)=O)CCC)=O)C)=O	1.21	2.83.E-08	-7.55	99%	1.5
CHP19L	CHP19L_sub1_6	D-Pro	D-Tyr	L-Ala	L-Nva	D-Leu	L-Leu	656.825	656.3897	679.3795	679.2555	O=C([C@H]1CCCN1C([C@@H]2CC(C)C)=O)N[C@H](CC(C=C3)=CC=C3O)C(N[C@H](C(N[C@H](C(N[C@@H](C(N2)=O)CC(C)C)=O)CCC)=O)C)=O	1.98	3.84.E-07	-6.42	93%	11.3
CHP19L	CHP19L_sub1_7	D-Pro	D-Tyr	L-Ala	L-Nva	D-Nal	L-Leu	740.902	740.3897	763.3795	763.2745	O=C([C@H]1CCCN1C([C@@H]2CC(C)C)=O)N[C@H](CC(C=C3)=CC=C3O)C(N[C@H](C(N[C@H](C(N[C@@H](C(N2)=O)CC4=CC(C=CC=C5)=C5C=C4)=O)CCC)=O)C)=O	3.35	4.54.E-06	-5.34	75%	48.6
CHP19L	CHP19L_sub1_8	D-Pro	D-Tyr	L-Ala	L-Nva	D-Thi	L-Leu	696.864	696.3305	719.3203	719.2033	O=C([C@H]1CCCN1C([C@@H]2CC(C)C)=O)N[C@H](CC(C=C3)=CC=C3O)C(N[C@H](C(N[C@H](C(N[C@@H](C(N2)=O)CC4=CC=CS4)=O)CCC)=O)C)=O	2.26	4.32.E-07	-6.36	94%	9.7
CHP19L	CHP19L_sub1_9	D-Pro	D-Tyr	L-Ala	L-Phe	D-Ala	L-Leu	662.788	662.3428	685.3326	685.2138	O=C([C@H]1CCCN1C([C@@H]2CC(C)C)=O)N[C@H](CC(C=C3)=CC=C3O)C(N[C@H](C(N[C@H](C(N[C@@H](C(N2)=O)C)=O)CC4=CC=CC=C4)=O)C)=O	1.66	1.18.E-07	-6.93	96%	6.3
CHP19L	CHP19L_sub1_10	D-Pro	D-Tyr	L-Ala	L-Phe	D-Leu	L-Leu	704.869	704.3897	727.3795	727.2736	O=C([C@H]1CCCN1C([C@@H]2CC(C)C)=O)N[C@H](CC(C=C3)=CC=C3O)C(N[C@H](C(N[C@H](C(N[C@@H](C(N2)=O)CC(C)C)=O)CC4=CC=CC=C4)=O)C)=O	2.32	1.64.E-06	-5.78	94%	11.1
CHP19L	CHP19L_sub1_11	D-Pro	D-Tyr	L-Ala	L-Phe	D-Nal	L-Leu	788.946	788.3897	811.3795	811.2875	O=C([C@H]1CCCN1C([C@@H]2CC(C)C)=O)N[C@H](CC(C=C3)=CC=C3O)C(N[C@H](C(N[C@H](C(N[C@@H](C(N2)=O)CC4=CC(C=CC=C5)=C5C=C4)=O)CC6=CC=CC=C6)=O)C)=O	4.12	8.37.E-06	-5.08	18%	290.1
CHP19L	CHP19L_sub1_12	D-Pro	D-Tyr	L-Ala	L-Phe	D-Thi	L-Leu	744.908	744.3305	767.3203	767.2268	O=C([C@H]1CCCN1C([C@@H]2CC(C)C)=O)N[C@H](CC(C=C3)=CC=C3O)C(N[C@H](C(N[C@H](C(N[C@@H](C(N2)=O)CC4=CC=CS4)=O)CC5=CC=CC=C5)=O)C)=O	3.03	1.48.E-06	-5.83	89%	19.5
CHP19L	CHP19L_sub1_13	D-Pro	D-Tyr	L-Ala	L-Phe(4F)	D-Ala	L-Leu	680.7784	680.3334	703.3232	703.2076	O=C([C@H]1CCCN1C([C@@H]2CC(C)C)=O)N[C@H](CC(C=C3)=CC=C3O)C(N[C@H](C(N[C@H](C(N[C@@H](C(N2)=O)C)=O)CC4=CC=C(F)C=C4)=O)C)=O	1.87	1.80.E-07	-6.75	94%	9.4
CHP19L	CHP19L_sub1_14	D-Pro	D-Tyr	L-Ala	L-Phe(4F)	D-Leu	L-Leu	722.8594	722.3803	745.3701	745.261	O=C([C@H]1CCCN1C([C@@H]2CC(C)C)=O)N[C@H](CC(C=C3)=CC=C3O)C(N[C@H](C(N[C@H](C(N[C@@H](C(N2)=O)CC(C)C)=O)CC4=CC=C(F)C=C4)=O)C)=O	2.16	2.14.E-06	-5.67	90%	17.6
CHP19L	CHP19L_sub1_15	D-Pro	D-Tyr	L-Ala	L-Phe(4F)	D-Nal	L-Leu	806.9364	806.3803	829.3701	829.2811	O=C([C@H]1CCCN1C([C@@H]2CC(C)C)=O)N[C@H](CC(C=C3)=CC=C3O)C(N[C@H](C(N[C@H](C(N[C@@H](C(N2)=O)CC4=CC(C=CC=C5)=C5C=C4)=O)CC6=CC=C(F)C=C6)=O)C)=O	3.99	8.02.E-06	-5.1	40%	152.5
CHP19L	CHP19L_sub1_16	D-Pro	D-Tyr	L-Ala	L-Phe(4F)	D-Thi	L-Leu	762.8984	762.3211	785.3109	785.2136	O=C([C@H]1CCCN1C([C@@H]2CC(C)C)=O)N[C@H](CC(C=C3)=CC=C3O)C(N[C@H](C(N[C@H](C(N[C@@H](C(N2)=O)CC4=CC=CS4)=O)CC5=CC=C(F)C=C5)=O)C)=O	3.31	2.22.E-06	-5.65	90%	18.4
CHP19L	CHP19L_sub2_1	D-Pro	D-Tyr	L-Abu	L-Abu	D-Ala	L-Leu	614.744	614.3427	637.3325	637.2364	O=C([C@H]1CCCN1C([C@@H]2CC(C)C)=O)N[C@H](CC(C=C3)=CC=C3O)C(N[C@H](C(N[C@H](C(N[C@@H](C(N2)=O)C)=O)CC)=O)CC)=O	1.09	2.55.E-08	-7.59	96%	7.6
CHP19L	CHP19L_sub2_2	D-Pro	D-Tyr	L-Abu	L-Abu	D-Leu	L-Leu	656.825	656.3896	679.3794	679.284	O=C([C@H]1CCCN1C([C@@H]2CC(C)C)=O)N[C@H](CC(C=C3)=CC=C3O)C(N[C@H](C(N[C@H](C(N[C@@H](C(N2)=O)CC(C)C)=O)CC)=O)CC)=O	1.98	2.91.E-07	-6.54	94%	11
CHP19L	CHP19L_sub2_3	D-Pro	D-Tyr	L-Abu	L-Abu	D-Nal	L-Leu	740.902	740.3896	763.3794	763.3024	O=C([C@H]1CCCN1C([C@@H]2CC(C)C)=O)N[C@H](CC(C=C3)=CC=C3O)C(N[C@H](C(N[C@H](C(N[C@@H](C(N2)=O)CC4=CC(C=CC=C5)=C5C=C4)=O)CC)=O)CC)=O	3.45	3.52.E-06	-5.45	80%	36.7
CHP19L	CHP19L_sub2_4	D-Pro	D-Tyr	L-Abu	L-Abu	D-Thi	L-Leu	696.864	696.3304	719.3202	719.2374	O=C([C@H]1CCCN1C([C@@H]2CC(C)C)=O)N[C@H](CC(C=C3)=CC=C3O)C(N[C@H](C(N[C@H](C(N[C@@H](C(N2)=O)CC4=CC=CS4)=O)CC)=O)CC)=O	2.31	2.94.E-07	-6.53	93%	11.2
CHP19L	CHP19L_sub2_5	D-Pro	D-Tyr	L-Abu	L-Nva	D-Ala	L-Leu	628.771	628.3584	651.3482	651.2496	O=C([C@H]1CCCN1C([C@@H]2CC(C)C)=O)N[C@H](CC(C=C3)=CC=C3O)C(N[C@H](C(N[C@H](C(N[C@@H](C(N2)=O)C)=O)CCC)=O)CC)=O	1.47	4.05.E-08	-7.39	97%	5.3
CHP19L	CHP19L_sub2_6	D-Pro	D-Tyr	L-Abu	L-Nva	D-Leu	L-Leu	670.852	670.4053	693.3951	693.2703	O=C([C@H]1CCCN1C([C@@H]2CC(C)C)=O)N[C@H](CC(C=C3)=CC=C3O)C(N[C@H](C(N[C@H](C(N[C@@H](C(N2)=O)CC(C)C)=O)CCC)=O)CC)=O	2.3	5.05.E-07	-6.3	93%	12.5
CHP19L	CHP19L_sub2_7	D-Pro	D-Tyr	L-Abu	L-Nva	D-Nal	L-Leu	754.929	754.4053	777.3951	777.3158	O=C([C@H]1CCCN1C([C@@H]2CC(C)C)=O)N[C@H](CC(C=C3)=CC=C3O)C(N[C@H](C(N[C@H](C(N[C@@H](C(N2)=O)CC4=CC(C=CC=C5)=C5C=C4)=O)CCC)=O)CC)=O	3.68	4.81.E-06	-5.32	82%	33.4
CHP19L	CHP19L_sub2_8	D-Pro	D-Tyr	L-Abu	L-Nva	D-Thi	L-Leu	710.891	710.3461	733.3359	733.2497	O=C([C@H]1CCCN1C([C@@H]2CC(C)C)=O)N[C@H](CC(C=C3)=CC=C3O)C(N[C@H](C(N[C@H](C(N[C@@H](C(N2)=O)CC4=CC=CS4)=O)CCC)=O)CC)=O	2.61	5.51.E-07	-6.26	93%	12
CHP19L	CHP19L_sub2_9	D-Pro	D-Tyr	L-Abu	L-Phe	D-Ala	L-Leu	676.815	676.3584	699.3482	699.2578	O=C([C@H]1CCCN1C([C@@H]2CC(C)C)=O)N[C@H](CC(C=C3)=CC=C3O)C(N[C@H](C(N[C@H](C(N[C@@H](C(N2)=O)C)=O)CC4=CC=CC=C4)=O)CC)=O	1.97	1.79.E-07	-6.75	95%	8.7
CHP19L	CHP19L_sub2_10	D-Pro	D-Tyr	L-Abu	L-Phe	D-Leu	L-Leu	718.896	718.4053	741.3951	741.3137	O=C([C@H]1CCCN1C([C@@H]2CC(C)C)=O)N[C@H](CC(C=C3)=CC=C3O)C(N[C@H](C(N[C@H](C(N[C@@H](C(N2)=O)CC(C)C)=O)CC4=CC=CC=C4)=O)CC)=O	2.83	1.82.E-06	-5.74	84%	29.6
CHP19L	CHP19L_sub2_11	D-Pro	D-Tyr	L-Abu	L-Phe	D-Nal	L-Leu	802.973	802.4053	825.3951	825.324	O=C([C@H]1CCCN1C([C@@H]2CC(C)C)=O)N[C@H](CC(C=C3)=CC=C3O)C(N[C@H](C(N[C@H](C(N[C@@H](C(N2)=O)CC4=CC(C=CC=C5)=C5C=C4)=O)CC6=CC=CC=C6)=O)CC)=O	4.42	7.43.E-06	-5.13	37%	164.4
CHP19L	CHP19L_sub2_12	D-Pro	D-Tyr	L-Abu	L-Phe	D-Thi	L-Leu	758.935	758.3461	781.3359	781.2635	O=C([C@H]1CCCN1C([C@@H]2CC(C)C)=O)N[C@H](CC(C=C3)=CC=C3O)C(N[C@H](C(N[C@H](C(N[C@@H](C(N2)=O)CC4=CC=CS4)=O)CC5=CC=CC=C5)=O)CC)=O	3.33	1.78.E-06	-5.75	85%	26.7
CHP19L	CHP19L_sub2_13	D-Pro	D-Tyr	L-Abu	L-Phe(4F)	D-Ala	L-Leu	694.8054	694.349	717.3388	717.2498	O=C([C@H]1CCCN1C([C@@H]2CC(C)C)=O)N[C@H](CC(C=C3)=CC=C3O)C(N[C@H](C(N[C@H](C(N[C@@H](C(N2)=O)C)=O)CC4=CC=C(F)C=C4)=O)CC)=O	2.11	2.90.E-07	-6.54	91%	15.2
CHP19L	CHP19L_sub2_14	D-Pro	D-Tyr	L-Abu	L-Phe(4F)	D-Leu	L-Leu	736.8864	736.3959	759.3857	759.2984	O=C([C@H]1CCCN1C([C@@H]2CC(C)C)=O)N[C@H](CC(C=C3)=CC=C3O)C(N[C@H](C(N[C@H](C(N[C@@H](C(N2)=O)CC(C)C)=O)CC4=CC=C(F)C=C4)=O)CC)=O	2.66	2.77.E-06	-5.56	89%	19.1
CHP19L	CHP19L_sub2_15	D-Pro	D-Tyr	L-Abu	L-Phe(4F)	D-Nal	L-Leu	820.9634	820.3959	843.3857	843.3232	O=C([C@H]1CCCN1C([C@@H]2CC(C)C)=O)N[C@H](CC(C=C3)=CC=C3O)C(N[C@H](C(N[C@H](C(N[C@@H](C(N2)=O)CC4=CC(C=CC=C5)=C5C=C4)=O)CC6=CC=C(F)C=C6)=O)CC)=O	4.36	6.99.E-06	-5.16	56%	95.6
CHP19L	CHP19L_sub2_16	D-Pro	D-Tyr	L-Abu	L-Phe(4F)	D-Thi	L-Leu	776.9254	776.3367	799.3265	799.2542	O=C([C@H]1CCCN1C([C@@H]2CC(C)C)=O)N[C@H](CC(C=C3)=CC=C3O)C(N[C@H](C(N[C@H](C(N[C@@H](C(N2)=O)CC4=CC=CS4)=O)CC5=CC=C(F)C=C5)=O)CC)=O	3.56	2.73.E-06	-5.56	82%	33
CHP19L	CHP19L_sub3_1	D-Pro	D-Tyr	L-Nva	L-Abu	D-Ala	L-Leu	628.771	628.3584	651.3482	651.326	O=C([C@H]1CCCN1C([C@@H]2CC(C)C)=O)N[C@H](CC(C=C3)=CC=C3O)C(N[C@H](C(N[C@H](C(N[C@@H](C(N2)=O)C)=O)CC)=O)CCC)=O	1.46	2.09.E-08	-7.68	103%	-5
CHP19L	CHP19L_sub3_2	D-Pro	D-Tyr	L-Nva	L-Abu	D-Leu	L-Leu	670.852	670.4053	693.3951	693.3776	O=C([C@H]1CCCN1C([C@@H]2CC(C)C)=O)N[C@H](CC(C=C3)=CC=C3O)C(N[C@H](C(N[C@H](C(N[C@@H](C(N2)=O)CC(C)C)=O)CC)=O)CCC)=O	2.3	3.10.E-07	-6.51	100%	0.2
CHP19L	CHP19L_sub3_3	D-Pro	D-Tyr	L-Nva	L-Abu	D-Nal	L-Leu	754.929	754.4053	777.3951	777.4171	O=C([C@H]1CCCN1C([C@@H]2CC(C)C)=O)N[C@H](CC(C=C3)=CC=C3O)C(N[C@H](C(N[C@H](C(N[C@@H](C(N2)=O)CC4=CC(C=CC=C5)=C5C=C4)=O)CC)=O)CCC)=O	3.68	2.58.E-06	-5.59	74%	50.8
CHP19L	CHP19L_sub3_4	D-Pro	D-Tyr	L-Nva	L-Abu	D-Thi	L-Leu	710.891	710.3461	733.3359	733.3413	O=C([C@H]1CCCN1C([C@@H]2CC(C)C)=O)N[C@H](CC(C=C3)=CC=C3O)C(N[C@H](C(N[C@H](C(N[C@@H](C(N2)=O)CC4=CC=CS4)=O)CC)=O)CCC)=O	2.61	3.02.E-07	-6.52	91%	15.4
CHP19L	CHP19L_sub3_5	D-Pro	D-Tyr	L-Nva	L-Nva	D-Ala	L-Leu	642.798	642.3741	665.3639	665.3484	O=C([C@H]1CCCN1C([C@@H]2CC(C)C)=O)N[C@H](CC(C=C3)=CC=C3O)C(N[C@H](C(N[C@H](C(N[C@@H](C(N2)=O)C)=O)CCC)=O)CCC)=O	1.86	4.03.E-08	-7.39	98%	2.6
CHP19L	CHP19L_sub3_6	D-Pro	D-Tyr	L-Nva	L-Nva	D-Leu	L-Leu	684.879	684.421	707.4108	707.4063	O=C([C@H]1CCCN1C([C@@H]2CC(C)C)=O)N[C@H](CC(C=C3)=CC=C3O)C(N[C@H](C(N[C@H](C(N[C@@H](C(N2)=O)CC(C)C)=O)CCC)=O)CCC)=O	2.57	5.95.E-07	-6.23	97%	4.2
CHP19L	CHP19L_sub3_7	D-Pro	D-Tyr	L-Nva	L-Nva	D-Nal	L-Leu	768.956	768.421	791.4108	791.44	O=C([C@H]1CCCN1C([C@@H]2CC(C)C)=O)N[C@H](CC(C=C3)=CC=C3O)C(N[C@H](C(N[C@H](C(N[C@@H](C(N2)=O)CC4=CC(C=CC=C5)=C5C=C4)=O)CCC)=O)CCC)=O	3.97	3.05.E-06	-5.52	80%	38.1
CHP19L	CHP19L_sub3_8	D-Pro	D-Tyr	L-Nva	L-Nva	D-Thi	L-Leu	724.918	724.3618	747.3516	747.364	O=C([C@H]1CCCN1C([C@@H]2CC(C)C)=O)N[C@H](CC(C=C3)=CC=C3O)C(N[C@H](C(N[C@H](C(N[C@@H](C(N2)=O)CC4=CC=CS4)=O)CCC)=O)CCC)=O	2.91	4.88.E-07	-6.31	90%	17.9
CHP19L	CHP19L_sub3_9	D-Pro	D-Tyr	L-Nva	L-Phe	D-Ala	L-Leu	690.842	690.3741	713.3639	713.3659	O=C([C@H]1CCCN1C([C@@H]2CC(C)C)=O)N[C@H](CC(C=C3)=CC=C3O)C(N[C@H](C(N[C@H](C(N[C@@H](C(N2)=O)C)=O)CC4=CC=CC=C4)=O)CCC)=O	2.36	1.90.E-07	-6.72	96%	6.2
CHP19L	CHP19L_sub3_10	D-Pro	D-Tyr	L-Nva	L-Phe	D-Leu	L-Leu	732.923	732.421	755.4108	755.4253	O=C([C@H]1CCCN1C([C@@H]2CC(C)C)=O)N[C@H](CC(C=C3)=CC=C3O)C(N[C@H](C(N[C@H](C(N[C@@H](C(N2)=O)CC(C)C)=O)CC4=CC=CC=C4)=O)CCC)=O	3.14	1.96.E-06	-5.71	92%	13.8
CHP19L	CHP19L_sub3_11	D-Pro	D-Tyr	L-Nva	L-Phe	D-Nal	L-Leu	817	816.421	839.4108	839.4533	O=C([C@H]1CCCN1C([C@@H]2CC(C)C)=O)N[C@H](CC(C=C3)=CC=C3O)C(N[C@H](C(N[C@H](C(N[C@@H](C(N2)=O)CC4=CC(C=CC=C5)=C5C=C4)=O)CC6=CC=CC=C6)=O)CCC)=O	4.68	4.73.E-06	-5.32	62%	81
CHP19L	CHP19L_sub3_12	D-Pro	D-Tyr	L-Nva	L-Phe	D-Thi	L-Leu	772.962	772.3618	795.3516	795.3884	O=C([C@H]1CCCN1C([C@@H]2CC(C)C)=O)N[C@H](CC(C=C3)=CC=C3O)C(N[C@H](C(N[C@H](C(N[C@@H](C(N2)=O)CC4=CC=CS4)=O)CC5=CC=CC=C5)=O)CCC)=O	3.49	1.58.E-06	-5.8	93%	12.6
CHP19L	CHP19L_sub3_13	D-Pro	D-Tyr	L-Nva	L-Phe(4F)	D-Ala	L-Leu	708.8324	708.3647	731.3545	731.3563	O=C([C@H]1CCCN1C([C@@H]2CC(C)C)=O)N[C@H](CC(C=C3)=CC=C3O)C(N[C@H](C(N[C@H](C(N[C@@H](C(N2)=O)C)=O)CC4=CC=C(F)C=C4)=O)CCC)=O	2.26	3.20.E-07	-6.5	95%	8.1
CHP19L	CHP19L_sub3_14	D-Pro	D-Tyr	L-Nva	L-Phe(4F)	D-Leu	L-Leu	750.9134	750.4116	773.4014	773.4135	O=C([C@H]1CCCN1C([C@@H]2CC(C)C)=O)N[C@H](CC(C=C3)=CC=C3O)C(N[C@H](C(N[C@H](C(N[C@@H](C(N2)=O)CC(C)C)=O)CC4=CC=C(F)C=C4)=O)CCC)=O	3.09	3.13.E-06	-5.5	92%	13.6
CHP19L	CHP19L_sub3_15	D-Pro	D-Tyr	L-Nva	L-Phe(4F)	D-Nal	L-Leu	834.9904	834.4116	857.4014	857.4506	O=C([C@H]1CCCN1C([C@@H]2CC(C)C)=O)N[C@H](CC(C=C3)=CC=C3O)C(N[C@H](C(N[C@H](C(N[C@@H](C(N2)=O)CC4=CC(C=CC=C5)=C5C=C4)=O)CC6=CC=C(F)C=C6)=O)CCC)=O	4.63	4.41.E-06	-5.36	86%	25.1
CHP19L	CHP19L_sub3_16	D-Pro	D-Tyr	L-Nva	L-Phe(4F)	D-Thi	L-Leu	790.9524	790.3524	813.3422	813.3753	O=C([C@H]1CCCN1C([C@@H]2CC(C)C)=O)N[C@H](CC(C=C3)=CC=C3O)C(N[C@H](C(N[C@H](C(N[C@@H](C(N2)=O)CC4=CC=CS4)=O)CC5=CC=C(F)C=C5)=O)CCC)=O	3.73	2.38.E-06	-5.62	91%	15.8
CHP19L	CHP19L_sub4_1	D-Pro	D-Tyr	L-Leu	L-Abu	D-Ala	L-Leu	642.798	642.374	665.3638	665.3628	O=C([C@H]1CCCN1C([C@@H]2CC(C)C)=O)N[C@H](CC(C=C3)=CC=C3O)C(N[C@H](C(N[C@H](C(N[C@@H](C(N2)=O)C)=O)CC)=O)CC(C)C)=O	1.59	6.51.E-08	-7.19	100%	0.6
CHP19L	CHP19L_sub4_2	D-Pro	D-Tyr	L-Leu	L-Abu	D-Leu	L-Leu	684.879	684.4209	707.4107	707.427	O=C([C@H]1CCCN1C([C@@H]2CC(C)C)=O)N[C@H](CC(C=C3)=CC=C3O)C(N[C@H](C(N[C@H](C(N[C@@H](C(N2)=O)CC(C)C)=O)CC)=O)CC(C)C)=O	2.49	7.05.E-07	-6.15	98%	3
CHP19L	CHP19L_sub4_3	D-Pro	D-Tyr	L-Leu	L-Abu	D-Nal	L-Leu	768.956	768.4209	791.4107	791.4632	O=C([C@H]1CCCN1C([C@@H]2CC(C)C)=O)N[C@H](CC(C=C3)=CC=C3O)C(N[C@H](C(N[C@H](C(N[C@@H](C(N2)=O)CC4=CC(C=CC=C5)=C5C=C4)=O)CC)=O)CC(C)C)=O	3.87	4.06.E-06	-5.39	82%	33.2
CHP19L	CHP19L_sub4_4	D-Pro	D-Tyr	L-Leu	L-Abu	D-Thi	L-Leu	724.918	724.3617	747.3515	747.3899	O=C([C@H]1CCCN1C([C@@H]2CC(C)C)=O)N[C@H](CC(C=C3)=CC=C3O)C(N[C@H](C(N[C@H](C(N[C@@H](C(N2)=O)CC4=CC=CS4)=O)CC)=O)CC(C)C)=O	2.5	7.14.E-07	-6.15	93%	12.8
CHP19L	CHP19L_sub4_5	D-Pro	D-Tyr	L-Leu	L-Nva	D-Ala	L-Leu	656.825	656.3897	679.3795	679.385	O=C([C@H]1CCCN1C([C@@H]2CC(C)C)=O)N[C@H](CC(C=C3)=CC=C3O)C(N[C@H](C(N[C@H](C(N[C@@H](C(N2)=O)C)=O)CCC)=O)CC(C)C)=O	1.98	1.02.E-07	-6.99	99%	1.2
CHP19L	CHP19L_sub4_6	D-Pro	D-Tyr	L-Leu	L-Nva	D-Leu	L-Leu	698.906	698.4366	721.4264	721.4438	O=C([C@H]1CCCN1C([C@@H]2CC(C)C)=O)N[C@H](CC(C=C3)=CC=C3O)C(N[C@H](C(N[C@H](C(N[C@@H](C(N2)=O)CC(C)C)=O)CCC)=O)CC(C)C)=O	2.72	1.31.E-06	-5.88	93%	12.7
CHP19L	CHP19L_sub4_7	D-Pro	D-Tyr	L-Leu	L-Nva	D-Nal	L-Leu	782.983	782.4366	805.4264	805.4866	O=C([C@H]1CCCN1C([C@@H]2CC(C)C)=O)N[C@H](CC(C=C3)=CC=C3O)C(N[C@H](C(N[C@H](C(N[C@@H](C(N2)=O)CC4=CC(C=CC=C5)=C5C=C4)=O)CCC)=O)CC(C)C)=O	4.09	4.74.E-06	-5.32	87%	24
CHP19L	CHP19L_sub4_8	D-Pro	D-Tyr	L-Leu	L-Nva	D-Thi	L-Leu	738.945	738.3774	761.3672	761.4067	O=C([C@H]1CCCN1C([C@@H]2CC(C)C)=O)N[C@H](CC(C=C3)=CC=C3O)C(N[C@H](C(N[C@H](C(N[C@@H](C(N2)=O)CC4=CC=CS4)=O)CCC)=O)CC(C)C)=O	2.87	1.15.E-06	-5.94	93%	11.4
CHP19L	CHP19L_sub4_9	D-Pro	D-Tyr	L-Leu	L-Phe	D-Ala	L-Leu	704.869	704.3897	727.3795	727.4045	O=C([C@H]1CCCN1C([C@@H]2CC(C)C)=O)N[C@H](CC(C=C3)=CC=C3O)C(N[C@H](C(N[C@H](C(N[C@@H](C(N2)=O)C)=O)CC4=CC=CC=C4)=O)CC(C)C)=O	2.32	4.74.E-07	-6.32	94%	10.6
CHP19L	CHP19L_sub4_10	D-Pro	D-Tyr	L-Leu	L-Phe	D-Leu	L-Leu	746.95	746.4366	769.4264	769.4719	O=C([C@H]1CCCN1C([C@@H]2CC(C)C)=O)N[C@H](CC(C=C3)=CC=C3O)C(N[C@H](C(N[C@H](C(N[C@@H](C(N2)=O)CC(C)C)=O)CC4=CC=CC=C4)=O)CC(C)C)=O	3.05	3.69.E-06	-5.43	90%	18.3
CHP19L	CHP19L_sub4_11	D-Pro	D-Tyr	L-Leu	L-Phe	D-Nal	L-Leu	831.027	830.4366	853.4264	853.5036	O=C([C@H]1CCCN1C([C@@H]2CC(C)C)=O)N[C@H](CC(C=C3)=CC=C3O)C(N[C@H](C(N[C@H](C(N[C@@H](C(N2)=O)CC4=CC(C=CC=C5)=C5C=C4)=O)CC6=CC=CC=C6)=O)CC(C)C)=O	4.71	2.89.E-06	-5.54	94%	9.6
CHP19L	CHP19L_sub4_12	D-Pro	D-Tyr	L-Leu	L-Phe	D-Thi	L-Leu	786.989	786.3774	809.3672	809.4346	O=C([C@H]1CCCN1C([C@@H]2CC(C)C)=O)N[C@H](CC(C=C3)=CC=C3O)C(N[C@H](C(N[C@H](C(N[C@@H](C(N2)=O)CC4=CC=CS4)=O)CC5=CC=CC=C5)=O)CC(C)C)=O	3.31	2.94.E-06	-5.53	89%	20.3
CHP19L	CHP19L_sub4_13	D-Pro	D-Tyr	L-Leu	L-Phe(4F)	D-Ala	L-Leu	722.8594	722.3803	745.3701	745.3995	O=C([C@H]1CCCN1C([C@@H]2CC(C)C)=O)N[C@H](CC(C=C3)=CC=C3O)C(N[C@H](C(N[C@H](C(N[C@@H](C(N2)=O)C)=O)CC4=CC=C(F)C=C4)=O)CC(C)C)=O	2.16	7.62.E-07	-6.12	89%	19
CHP19L	CHP19L_sub4_14	D-Pro	D-Tyr	L-Leu	L-Phe(4F)	D-Leu	L-Leu	764.9404	764.4272	787.417	787.4622	O=C([C@H]1CCCN1C([C@@H]2CC(C)C)=O)N[C@H](CC(C=C3)=CC=C3O)C(N[C@H](C(N[C@H](C(N[C@@H](C(N2)=O)CC(C)C)=O)CC4=CC=C(F)C=C4)=O)CC(C)C)=O	3.06	4.84.E-06	-5.31	94%	11
CHP19L	CHP19L_sub4_15	D-Pro	D-Tyr	L-Leu	L-Phe(4F)	D-Nal	L-Leu	849.0174	848.4272	871.417	871.5012	O=C([C@H]1CCCN1C([C@@H]2CC(C)C)=O)N[C@H](CC(C=C3)=CC=C3O)C(N[C@H](C(N[C@H](C(N[C@@H](C(N2)=O)CC4=CC(C=CC=C5)=C5C=C4)=O)CC6=CC=C(F)C=C6)=O)CC(C)C)=O	4.65	2.11.E-06	-5.68	113%	-20
CHP19L	CHP19L_sub4_16	D-Pro	D-Tyr	L-Leu	L-Phe(4F)	D-Thi	L-Leu	804.9794	804.368	827.3578	827.426	O=C([C@H]1CCCN1C([C@@H]2CC(C)C)=O)N[C@H](CC(C=C3)=CC=C3O)C(N[C@H](C(N[C@H](C(N[C@@H](C(N2)=O)CC4=CC=CS4)=O)CC5=CC=C(F)C=C5)=O)CC(C)C)=O	3.53	3.84.E-06	-5.42	87%	22.4
CHP19L	CHP19L_sub5_1	D-Pro	D-Tyr	L-Phe	L-Abu	D-Ala	L-Leu	676.815	676.3584	699.3482	699.3768	O=C([C@H]1CCCN1C([C@@H]2CC(C)C)=O)N[C@H](CC(C=C3)=CC=C3O)C(N[C@H](C(N[C@H](C(N[C@@H](C(N2)=O)C)=O)CC)=O)CC4=CC=CC=C4)=O	1.97	1.03.E-07	-6.99	102%	-3.9
CHP19L	CHP19L_sub5_2	D-Pro	D-Tyr	L-Phe	L-Abu	D-Leu	L-Leu	718.896	718.4053	741.3951	741.4417	O=C([C@H]1CCCN1C([C@@H]2CC(C)C)=O)N[C@H](CC(C=C3)=CC=C3O)C(N[C@H](C(N[C@H](C(N[C@@H](C(N2)=O)CC(C)C)=O)CC)=O)CC4=CC=CC=C4)=O	2.83	1.48.E-06	-5.83	97%	5.6
CHP19L	CHP19L_sub5_3	D-Pro	D-Tyr	L-Phe	L-Abu	D-Nal	L-Leu	802.973	802.4053	825.3951	825.4872	O=C([C@H]1CCCN1C([C@@H]2CC(C)C)=O)N[C@H](CC(C=C3)=CC=C3O)C(N[C@H](C(N[C@H](C(N[C@@H](C(N2)=O)CC4=CC(C=CC=C5)=C5C=C4)=O)CC)=O)CC4=CC=CC=C4)=O	4.42	4.55.E-06	-5.34	50%	117.1
CHP19L	CHP19L_sub5_4	D-Pro	D-Tyr	L-Phe	L-Abu	D-Thi	L-Leu	758.935	758.3461	781.3359	781.4108	O=C([C@H]1CCCN1C([C@@H]2CC(C)C)=O)N[C@H](CC(C=C3)=CC=C3O)C(N[C@H](C(N[C@H](C(N[C@@H](C(N2)=O)CC4=CC=CS4)=O)CC)=O)CC4=CC=CC=C4)=O	3.32	1.14.E-06	-5.94	88%	22
CHP19L	CHP19L_sub5_5	D-Pro	D-Tyr	L-Phe	L-Nva	D-Ala	L-Leu	690.842	690.3741	713.3639	713.4006	O=C([C@H]1CCCN1C([C@@H]2CC(C)C)=O)N[C@H](CC(C=C3)=CC=C3O)C(N[C@H](C(N[C@H](C(N[C@@H](C(N2)=O)C)=O)CCC)=O)CC4=CC=CC=C4)=O	2.36	2.35.E-07	-6.63	92%	14
CHP19L	CHP19L_sub5_6	D-Pro	D-Tyr	L-Phe	L-Nva	D-Leu	L-Leu	732.923	732.421	755.4108	755.4629	O=C([C@H]1CCCN1C([C@@H]2CC(C)C)=O)N[C@H](CC(C=C3)=CC=C3O)C(N[C@H](C(N[C@H](C(N[C@@H](C(N2)=O)CC(C)C)=O)CCC)=O)CC4=CC=CC=C4)=O	3.13	2.93.E-06	-5.53	75%	48.9
CHP19L	CHP19L_sub5_7	D-Pro	D-Tyr	L-Phe	L-Nva	D-Nal	L-Leu	817	816.421	839.4108	839.5102	O=C([C@H]1CCCN1C([C@@H]2CC(C)C)=O)N[C@H](CC(C=C3)=CC=C3O)C(N[C@H](C(N[C@H](C(N[C@@H](C(N2)=O)CC4=CC(C=CC=C5)=C5C=C4)=O)CCC)=O)CC4=CC=CC=C4)=O	4.67	3.51.E-06	-5.45	44%	135.3
CHP19L	CHP19L_sub5_8	D-Pro	D-Tyr	L-Phe	L-Nva	D-Thi	L-Leu	772.962	772.3618	795.3516	795.4224	O=C([C@H]1CCCN1C([C@@H]2CC(C)C)=O)N[C@H](CC(C=C3)=CC=C3O)C(N[C@H](C(N[C@H](C(N[C@@H](C(N2)=O)CC4=CC=CS4)=O)CCC)=O)CC4=CC=CC=C4)=O	3.49	2.24.E-06	-5.65	73%	52.6
CHP19L	CHP19L_sub5_9	D-Pro	D-Tyr	L-Phe	L-Phe	D-Ala	L-Leu	738.886	738.3741	761.3639	761.4285	O=C([C@H]1CCCN1C([C@@H]2CC(C)C)=O)N[C@H](CC(C=C3)=CC=C3O)C(N[C@H](C(N[C@H](C(N[C@@H](C(N2)=O)C)=O)CC4=CC=CC=C4)=O)CC4=CC=CC=C4)=O	2.92	7.96.E-07	-6.1	95%	8.2
CHP19L	CHP19L_sub5_10	D-Pro	D-Tyr	L-Phe	L-Phe	D-Leu	L-Leu	780.967	780.421	803.4108	803.4924	O=C([C@H]1CCCN1C([C@@H]2CC(C)C)=O)N[C@H](CC(C=C3)=CC=C3O)C(N[C@H](C(N[C@H](C(N[C@@H](C(N2)=O)CC(C)C)=O)CC4=CC=CC=C4)=O)CC4=CC=CC=C4)=O	3.66	5.83.E-06	-5.23	80%	37.5
CHP19L	CHP19L_sub5_11	D-Pro	D-Tyr	L-Phe	L-Phe	D-Nal	L-Leu	865.044	864.421	887.4108	887.5343	O=C([C@H]1CCCN1C([C@@H]2CC(C)C)=O)N[C@H](CC(C=C3)=CC=C3O)C(N[C@H](C(N[C@H](C(N[C@@H](C(N2)=O)CC4=CC(C=CC=C5)=C5C=C4)=O)CC6=CC=CC=C6)=O)CC4=CC=CC=C4)=O	5.27	9.88.E-07	-6.01	80%	37.6
CHP19L	CHP19L_sub5_12	D-Pro	D-Tyr	L-Phe	L-Phe	D-Thi	L-Leu	821.006	820.3618	843.3516	843.4657	O=C([C@H]1CCCN1C([C@@H]2CC(C)C)=O)N[C@H](CC(C=C3)=CC=C3O)C(N[C@H](C(N[C@H](C(N[C@@H](C(N2)=O)CC4=CC=CS4)=O)CC5=CC=CC=C5)=O)CC4=CC=CC=C4)=O	4.21	3.79.E-06	-5.42	86%	24.3
CHP19L	CHP19L_sub5_13	D-Pro	D-Tyr	L-Phe	L-Phe(4F)	D-Ala	L-Leu	756.8764	756.3647	779.3545	779.4181	O=C([C@H]1CCCN1C([C@@H]2CC(C)C)=O)N[C@H](CC(C=C3)=CC=C3O)C(N[C@H](C(N[C@H](C(N[C@@H](C(N2)=O)C)=O)CC4=CC=C(F)C=C4)=O)CC4=CC=CC=C4)=O	2.99	1.29.E-06	-5.89	92%	13.2
CHP19L	CHP19L_sub5_14	D-Pro	D-Tyr	L-Phe	L-Phe(4F)	D-Leu	L-Leu	798.9574	798.4116	821.4014	821.4856	O=C([C@H]1CCCN1C([C@@H]2CC(C)C)=O)N[C@H](CC(C=C3)=CC=C3O)C(N[C@H](C(N[C@H](C(N[C@@H](C(N2)=O)CC(C)C)=O)CC4=CC=C(F)C=C4)=O)CC4=CC=CC=C4)=O	3.6	5.73.E-06	-5.24	92%	13.4
CHP19L	CHP19L_sub5_15	D-Pro	D-Tyr	L-Phe	L-Phe(4F)	D-Nal	L-Leu	883.0344	882.4116	905.4014	905.5297	O=C([C@H]1CCCN1C([C@@H]2CC(C)C)=O)N[C@H](CC(C=C3)=CC=C3O)C(N[C@H](C(N[C@H](C(N[C@@H](C(N2)=O)CC4=CC(C=CC=C5)=C5C=C4)=O)CC6=CC=C(F)C=C6)=O)CC4=CC=CC=C4)=O	5.2	5.30.E-07	-6.28
CHP19L	CHP19L_sub5_16	D-Pro	D-Tyr	L-Phe	L-Phe(4F)	D-Thi	L-Leu	838.9964	838.3524	861.3422	861.4507	O=C([C@H]1CCCN1C([C@@H]2CC(C)C)=O)N[C@H](CC(C=C3)=CC=C3O)C(N[C@H](C(N[C@H](C(N[C@@H](C(N2)=O)CC4=CC=CS4)=O)CC5=CC=C(F)C=C5)=O)CC4=CC=CC=C4)=O	4.32	4.05.E-06	-5.39	93%	11.3
CHP19L	CHP19L_sub6_1	D-Pro	D-Tyr	L-Nal	L-Abu	D-Ala	L-Leu	726.875	726.374	749.3638	749.4605	O=C([C@H]1CCCN1C([C@@H]2CC(C)C)=O)N[C@H](CC(C=C3)=CC=C3O)C(N[C@H](C(N[C@H](C(N[C@@H](C(N2)=O)C)=O)CC)=O)CC4=CC(C=CC=C5)=C5C=C4)=O	3.06	1.23.E-06	-5.91	91%	16.3
CHP19L	CHP19L_sub6_2	D-Pro	D-Tyr	L-Nal	L-Abu	D-Leu	L-Leu	768.956	768.4209	791.4107	791.5199	O=C([C@H]1CCCN1C([C@@H]2CC(C)C)=O)N[C@H](CC(C=C3)=CC=C3O)C(N[C@H](C(N[C@H](C(N[C@@H](C(N2)=O)CC(C)C)=O)CC)=O)CC4=CC(C=CC=C5)=C5C=C4)=O	3.86	6.44.E-06	-5.19	76%	46.2
CHP19L	CHP19L_sub6_3	D-Pro	D-Tyr	L-Nal	L-Abu	D-Nal	L-Leu	853.033	852.4209	875.4107	875.5651	O=C([C@H]1CCCN1C([C@@H]2CC(C)C)=O)N[C@H](CC(C=C3)=CC=C3O)C(N[C@H](C(N[C@H](C(N[C@@H](C(N2)=O)CC4=CC(C=CC=C5)=C5C=C4)=O)CC)=O)CC4=CC(C=CC=C5)=C5C=C4)=O	5.37	1.24.E-06	-5.91	78%	41.7
CHP19L	CHP19L_sub6_4	D-Pro	D-Tyr	L-Nal	L-Abu	D-Thi	L-Leu	808.995	808.3617	831.3515	831.4983	O=C([C@H]1CCCN1C([C@@H]2CC(C)C)=O)N[C@H](CC(C=C3)=CC=C3O)C(N[C@H](C(N[C@H](C(N[C@@H](C(N2)=O)CC4=CC=CS4)=O)CC)=O)CC4=CC(C=CC=C5)=C5C=C4)=O	4.36	4.82.E-06	-5.32	49%	118.9
CHP19L	CHP19L_sub6_5	D-Pro	D-Tyr	L-Nal	L-Nva	D-Ala	L-Leu	740.902	740.3897	763.3795	763.4839	O=C([C@H]1CCCN1C([C@@H]2CC(C)C)=O)N[C@H](CC(C=C3)=CC=C3O)C(N[C@H](C(N[C@H](C(N[C@@H](C(N2)=O)C)=O)CCC)=O)CC4=CC(C=CC=C5)=C5C=C4)=O	3.33	2.47.E-06	-5.61	76%	45.1
CHP19L	CHP19L_sub6_6	D-Pro	D-Tyr	L-Nal	L-Nva	D-Leu	L-Leu	782.983	782.4366	805.4264	805.5496	O=C([C@H]1CCCN1C([C@@H]2CC(C)C)=O)N[C@H](CC(C=C3)=CC=C3O)C(N[C@H](C(N[C@H](C(N[C@@H](C(N2)=O)CC(C)C)=O)CCC)=O)CC4=CC(C=CC=C5)=C5C=C4)=O	4.08	6.70.E-06	-5.17	63%	77.6
CHP19L	CHP19L_sub6_7	D-Pro	D-Tyr	L-Nal	L-Nva	D-Nal	L-Leu	867.06	866.4366	889.4264	889.5832	O=C([C@H]1CCCN1C([C@@H]2CC(C)C)=O)N[C@H](CC(C=C3)=CC=C3O)C(N[C@H](C(N[C@H](C(N[C@@H](C(N2)=O)CC4=CC(C=CC=C5)=C5C=C4)=O)CCC)=O)CC4=CC(C=CC=C5)=C5C=C4)=O	5.61	5.97.E-07	-6.22	106%	-10.3
CHP19L	CHP19L_sub6_8	D-Pro	D-Tyr	L-Nal	L-Nva	D-Thi	L-Leu	823.022	822.3774	845.3672	845.5025	O=C([C@H]1CCCN1C([C@@H]2CC(C)C)=O)N[C@H](CC(C=C3)=CC=C3O)C(N[C@H](C(N[C@H](C(N[C@@H](C(N2)=O)CC4=CC=CS4)=O)CCC)=O)CC4=CC(C=CC=C5)=C5C=C4)=O	4.54	4.04.E-06	-5.39	48%	122.9
CHP19L	CHP19L_sub6_9	D-Pro	D-Tyr	L-Nal	L-Phe	D-Ala	L-Leu	788.946	788.3897	811.3795	811.4994	O=C([C@H]1CCCN1C([C@@H]2CC(C)C)=O)N[C@H](CC(C=C3)=CC=C3O)C(N[C@H](C(N[C@H](C(N[C@@H](C(N2)=O)C)=O)CC4=CC=CC=C4)=O)CC4=CC(C=CC=C5)=C5C=C4)=O	4.11	4.75.E-06	-5.32	83%	30.9
CHP19L	CHP19L_sub6_10	D-Pro	D-Tyr	L-Nal	L-Phe	D-Leu	L-Leu	831.027	830.4366	853.4264	853.5669	O=C([C@H]1CCCN1C([C@@H]2CC(C)C)=O)N[C@H](CC(C=C3)=CC=C3O)C(N[C@H](C(N[C@H](C(N[C@@H](C(N2)=O)CC(C)C)=O)CC4=CC=CC=C4)=O)CC4=CC(C=CC=C5)=C5C=C4)=O	4.71	2.54.E-06	-5.59	111%	-17.1
CHP19L	CHP19L_sub6_11	D-Pro	D-Tyr	L-Nal	L-Phe	D-Nal	L-Leu	915.104	914.4366	937.4264	937.6161	O=C([C@H]1CCCN1C([C@@H]2CC(C)C)=O)N[C@H](CC(C=C3)=CC=C3O)C(N[C@H](C(N[C@H](C(N[C@@H](C(N2)=O)CC4=CC(C=CC=C5)=C5C=C4)=O)CC6=CC=CC=C6)=O)CC4=CC(C=CC=C5)=C5C=C4)=O	6.09	1.09.E-07	-6.96
CHP19L	CHP19L_sub6_12	D-Pro	D-Tyr	L-Nal	L-Phe	D-Thi	L-Leu	871.066	870.3774	893.3672	893.5369	O=C([C@H]1CCCN1C([C@@H]2CC(C)C)=O)N[C@H](CC(C=C3)=CC=C3O)C(N[C@H](C(N[C@H](C(N[C@@H](C(N2)=O)CC4=CC=CS4)=O)CC5=CC=CC=C5)=O)CC4=CC(C=CC=C5)=C5C=C4)=O	5.08	1.54.E-06	-5.81	101%	-2.3
CHP19L	CHP19L_sub6_13	D-Pro	D-Tyr	L-Nal	L-Phe(4F)	D-Ala	L-Leu	806.9364	806.3803	829.3701	829.4959	O=C([C@H]1CCCN1C([C@@H]2CC(C)C)=O)N[C@H](CC(C=C3)=CC=C3O)C(N[C@H](C(N[C@H](C(N[C@@H](C(N2)=O)C)=O)CC4=CC=C(F)C=C4)=O)CC4=CC(C=CC=C5)=C5C=C4)=O	3.99	5.15.E-06	-5.29	73%	53.2
CHP19L	CHP19L_sub6_14	D-Pro	D-Tyr	L-Nal	L-Phe(4F)	D-Leu	L-Leu	849.0174	848.4272	871.417	871.5565	O=C([C@H]1CCCN1C([C@@H]2CC(C)C)=O)N[C@H](CC(C=C3)=CC=C3O)C(N[C@H](C(N[C@H](C(N[C@@H](C(N2)=O)CC(C)C)=O)CC4=CC=C(F)C=C4)=O)CC4=CC(C=CC=C5)=C5C=C4)=O	4.68	1.55.E-06	-5.81	108%	-12.7
CHP19L	CHP19L_sub6_15	D-Pro	D-Tyr	L-Nal	L-Phe(4F)	D-Nal	L-Leu	933.0944	932.4272	955.417	955.6192	O=C([C@H]1CCCN1C([C@@H]2CC(C)C)=O)N[C@H](CC(C=C3)=CC=C3O)C(N[C@H](C(N[C@H](C(N[C@@H](C(N2)=O)CC4=CC(C=CC=C5)=C5C=C4)=O)CC6=CC=C(F)C=C6)=O)CC4=CC(C=CC=C5)=C5C=C4)=O	5.99	5.61.E-08	-7.25
CHP19L	CHP19L_sub6_16	D-Pro	D-Tyr	L-Nal	L-Phe(4F)	D-Thi	L-Leu	889.0564	888.368	911.3578	911.5303	O=C([C@H]1CCCN1C([C@@H]2CC(C)C)=O)N[C@H](CC(C=C3)=CC=C3O)C(N[C@H](C(N[C@H](C(N[C@@H](C(N2)=O)CC4=CC=CS4)=O)CC5=CC=C(F)C=C5)=O)CC4=CC(C=CC=C5)=C5C=C4)=O	5.11	9.85.E-07	-6.01	108%	-13.1
CHP19L	CHP19L_sub7_1	D-Pro	D-Tyr	L-Phe(4F)	L-Abu	D-Ala	L-Leu	694.8054	694.349	717.3388	717.4971	O=C([C@H]1CCCN1C([C@@H]2CC(C)C)=O)N[C@H](CC(C=C3)=CC=C3O)C(N[C@H](C(N[C@H](C(N[C@@H](C(N2)=O)C)=O)CC)=O)CC4=CC=C(F)C=C4)=O	2.1	1.77.E-07	-6.75	97%	4.8
CHP19L	CHP19L_sub7_2	D-Pro	D-Tyr	L-Phe(4F)	L-Abu	D-Leu	L-Leu	736.8864	736.3959	759.3857	759.5548	O=C([C@H]1CCCN1C([C@@H]2CC(C)C)=O)N[C@H](CC(C=C3)=CC=C3O)C(N[C@H](C(N[C@H](C(N[C@@H](C(N2)=O)CC(C)C)=O)CC)=O)CC4=CC=C(F)C=C4)=O	2.66	2.24.E-06	-5.65	98%	3
CHP19L	CHP19L_sub7_3	D-Pro	D-Tyr	L-Phe(4F)	L-Abu	D-Nal	L-Leu	820.9634	820.3959	843.3857	843.5957	O=C([C@H]1CCCN1C([C@@H]2CC(C)C)=O)N[C@H](CC(C=C3)=CC=C3O)C(N[C@H](C(N[C@H](C(N[C@@H](C(N2)=O)CC4=CC(C=CC=C5)=C5C=C4)=O)CC)=O)CC4=CC=C(F)C=C4)=O	4.37	4.69.E-06	-5.33	46%	128.1
CHP19L	CHP19L_sub7_4	D-Pro	D-Tyr	L-Phe(4F)	L-Abu	D-Thi	L-Leu	776.9254	776.3367	799.3265	799.527	O=C([C@H]1CCCN1C([C@@H]2CC(C)C)=O)N[C@H](CC(C=C3)=CC=C3O)C(N[C@H](C(N[C@H](C(N[C@@H](C(N2)=O)CC4=CC=CS4)=O)CC)=O)CC4=CC=C(F)C=C4)=O	3.56	1.92.E-06	-5.72	84%	29.8
CHP19L	CHP19L_sub7_5	D-Pro	D-Tyr	L-Phe(4F)	L-Nva	D-Ala	L-Leu	708.8324	708.3647	731.3545	731.5183	O=C([C@H]1CCCN1C([C@@H]2CC(C)C)=O)N[C@H](CC(C=C3)=CC=C3O)C(N[C@H](C(N[C@H](C(N[C@@H](C(N2)=O)C)=O)CCC)=O)CC4=CC=C(F)C=C4)=O	2.26	3.69.E-07	-6.43	85%	26.2
CHP19L	CHP19L_sub7_6	D-Pro	D-Tyr	L-Phe(4F)	L-Nva	D-Leu	L-Leu	750.9134	750.4116	773.4014	773.5761	O=C([C@H]1CCCN1C([C@@H]2CC(C)C)=O)N[C@H](CC(C=C3)=CC=C3O)C(N[C@H](C(N[C@H](C(N[C@@H](C(N2)=O)CC(C)C)=O)CCC)=O)CC4=CC=C(F)C=C4)=O	3.11	3.73.E-06	-5.43	87%	22.9
CHP19L	CHP19L_sub7_7	D-Pro	D-Tyr	L-Phe(4F)	L-Nva	D-Nal	L-Leu	834.9904	834.4116	857.4014	857.6152	O=C([C@H]1CCCN1C([C@@H]2CC(C)C)=O)N[C@H](CC(C=C3)=CC=C3O)C(N[C@H](C(N[C@H](C(N[C@@H](C(N2)=O)CC4=CC(C=CC=C5)=C5C=C4)=O)CCC)=O)CC4=CC=C(F)C=C4)=O	4.65	3.05.E-06	-5.52	51%	112.2
CHP19L	CHP19L_sub7_8	D-Pro	D-Tyr	L-Phe(4F)	L-Nva	D-Thi	L-Leu	790.9524	790.3524	813.3422	813.531	O=C([C@H]1CCCN1C([C@@H]2CC(C)C)=O)N[C@H](CC(C=C3)=CC=C3O)C(N[C@H](C(N[C@H](C(N[C@@H](C(N2)=O)CC4=CC=CS4)=O)CCC)=O)CC4=CC=C(F)C=C4)=O	3.74	3.02.E-06	-5.52	80%	37.7
CHP19L	CHP19L_sub7_9	D-Pro	D-Tyr	L-Phe(4F)	L-Phe	D-Ala	L-Leu	756.8764	756.3647	779.3545	779.5329	O=C([C@H]1CCCN1C([C@@H]2CC(C)C)=O)N[C@H](CC(C=C3)=CC=C3O)C(N[C@H](C(N[C@H](C(N[C@@H](C(N2)=O)C)=O)CC4=CC=CC=C4)=O)CC4=CC=C(F)C=C4)=O	2.99	1.35.E-06	-5.87	93%	12.7
CHP19L	CHP19L_sub7_10	D-Pro	D-Tyr	L-Phe(4F)	L-Phe	D-Leu	L-Leu	798.9574	798.4116	821.4014	821.5999	O=C([C@H]1CCCN1C([C@@H]2CC(C)C)=O)N[C@H](CC(C=C3)=CC=C3O)C(N[C@H](C(N[C@H](C(N[C@@H](C(N2)=O)CC(C)C)=O)CC4=CC=CC=C4)=O)CC4=CC=C(F)C=C4)=O	3.62	5.57.E-06	-5.25	82%	33.9
CHP19L	CHP19L_sub7_11	D-Pro	D-Tyr	L-Phe(4F)	L-Phe	D-Nal	L-Leu	883.0344	882.4116	905.4014	905.6365	O=C([C@H]1CCCN1C([C@@H]2CC(C)C)=O)N[C@H](CC(C=C3)=CC=C3O)C(N[C@H](C(N[C@H](C(N[C@@H](C(N2)=O)CC4=CC(C=CC=C5)=C5C=C4)=O)CC6=CC=CC=C6)=O)CC4=CC=C(F)C=C4)=O	5.2	8.67.E-07	-6.06	74%	51.1
CHP19L	CHP19L_sub7_12	D-Pro	D-Tyr	L-Phe(4F)	L-Phe	D-Thi	L-Leu	838.9964	838.3524	861.3422	861.563	O=C([C@H]1CCCN1C([C@@H]2CC(C)C)=O)N[C@H](CC(C=C3)=CC=C3O)C(N[C@H](C(N[C@H](C(N[C@@H](C(N2)=O)CC4=CC=CS4)=O)CC5=CC=CC=C5)=O)CC4=CC=C(F)C=C4)=O	4.34	4.68.E-06	-5.33	93%	12.2
CHP19L	CHP19L_sub7_13	D-Pro	D-Tyr	L-Phe(4F)	L-Phe(4F)	D-Ala	L-Leu	774.8668	774.3553	797.3451	797.529	O=C([C@H]1CCCN1C([C@@H]2CC(C)C)=O)N[C@H](CC(C=C3)=CC=C3O)C(N[C@H](C(N[C@H](C(N[C@@H](C(N2)=O)C)=O)CC4=CC=C(F)C=C4)=O)CC4=CC=C(F)C=C4)=O	3.09	2.06.E-06	-5.69	93%	12.1
CHP19L	CHP19L_sub7_14	D-Pro	D-Tyr	L-Phe(4F)	L-Phe(4F)	D-Leu	L-Leu	816.9478	816.4022	839.392	839.5872	O=C([C@H]1CCCN1C([C@@H]2CC(C)C)=O)N[C@H](CC(C=C3)=CC=C3O)C(N[C@H](C(N[C@H](C(N[C@@H](C(N2)=O)CC(C)C)=O)CC4=CC=C(F)C=C4)=O)CC4=CC=C(F)C=C4)=O	3.52	5.54.E-06	-5.26	98%	3.9
CHP19L	CHP19L_sub7_15	D-Pro	D-Tyr	L-Phe(4F)	L-Phe(4F)	D-Nal	L-Leu	901.0248	900.4022	923.392	923.634	O=C([C@H]1CCCN1C([C@@H]2CC(C)C)=O)N[C@H](CC(C=C3)=CC=C3O)C(N[C@H](C(N[C@H](C(N[C@@H](C(N2)=O)CC4=CC(C=CC=C5)=C5C=C4)=O)CC6=CC=C(F)C=C6)=O)CC4=CC=C(F)C=C4)=O	5.11	4.44.E-07	-6.35
CHP19L	CHP19L_sub7_16	D-Pro	D-Tyr	L-Phe(4F)	L-Phe(4F)	D-Thi	L-Leu	856.9868	856.343	879.3328	879.5601	O=C([C@H]1CCCN1C([C@@H]2CC(C)C)=O)N[C@H](CC(C=C3)=CC=C3O)C(N[C@H](C(N[C@H](C(N[C@@H](C(N2)=O)CC4=CC=CS4)=O)CC5=CC=C(F)C=C5)=O)CC4=CC=C(F)C=C4)=O	4.25	4.24.E-06	-5.37	97%	5
CHP19L	CHP19L_sub8_1	D-Pro	D-Tyr	L-Thi	L-Abu	D-Ala	L-Leu	682.837	682.3148	705.3046	705.4809	O=C([C@H]1CCCN1C([C@@H]2CC(C)C)=O)N[C@H](CC(C=C3)=CC=C3O)C(N[C@H](C(N[C@H](C(N[C@@H](C(N2)=O)C)=O)CC)=O)CC4=CC=CS4)=O	1.92	7.80.E-08	-7.11	104%	-6.8
CHP19L	CHP19L_sub8_2	D-Pro	D-Tyr	L-Thi	L-Abu	D-Leu	L-Leu	724.918	724.3617	747.3515	747.5459	O=C([C@H]1CCCN1C([C@@H]2CC(C)C)=O)N[C@H](CC(C=C3)=CC=C3O)C(N[C@H](C(N[C@H](C(N[C@@H](C(N2)=O)CC(C)C)=O)CC)=O)CC4=CC=CS4)=O	2.51	1.15.E-06	-5.94	88%	21.7
CHP19L	CHP19L_sub8_3	D-Pro	D-Tyr	L-Thi	L-Abu	D-Nal	L-Leu	808.995	808.3617	831.3515	831.5902	O=C([C@H]1CCCN1C([C@@H]2CC(C)C)=O)N[C@H](CC(C=C3)=CC=C3O)C(N[C@H](C(N[C@H](C(N[C@@H](C(N2)=O)CC4=CC(C=CC=C5)=C5C=C4)=O)CC)=O)CC4=CC=CS4)=O	4.37	5.19.E-06	-5.29	49%	118.7
CHP19L	CHP19L_sub8_4	D-Pro	D-Tyr	L-Thi	L-Abu	D-Thi	L-Leu	764.957	764.3025	787.2923	787.5112	O=C([C@H]1CCCN1C([C@@H]2CC(C)C)=O)N[C@H](CC(C=C3)=CC=C3O)C(N[C@H](C(N[C@H](C(N[C@@H](C(N2)=O)CC4=CC=CS4)=O)CC)=O)CC4=CC=CS4)=O	3.04	1.13.E-06	-5.95	87%	22.3
CHP19L	CHP19L_sub8_5	D-Pro	D-Tyr	L-Thi	L-Nva	D-Ala	L-Leu	696.864	696.3305	719.3203	719.503	O=C([C@H]1CCCN1C([C@@H]2CC(C)C)=O)N[C@H](CC(C=C3)=CC=C3O)C(N[C@H](C(N[C@H](C(N[C@@H](C(N2)=O)C)=O)CCC)=O)CC4=CC=CS4)=O	2.27	1.70.E-07	-6.77	101%	-1.7
CHP19L	CHP19L_sub8_6	D-Pro	D-Tyr	L-Thi	L-Nva	D-Leu	L-Leu	738.945	738.3774	761.3672	761.5619	O=C([C@H]1CCCN1C([C@@H]2CC(C)C)=O)N[C@H](CC(C=C3)=CC=C3O)C(N[C@H](C(N[C@H](C(N[C@@H](C(N2)=O)CC(C)C)=O)CCC)=O)CC4=CC=CS4)=O	2.88	2.25.E-06	-5.65	68%	64.7
CHP19L	CHP19L_sub8_7	D-Pro	D-Tyr	L-Thi	L-Nva	D-Nal	L-Leu	823.022	822.3774	845.3672	845.6083	O=C([C@H]1CCCN1C([C@@H]2CC(C)C)=O)N[C@H](CC(C=C3)=CC=C3O)C(N[C@H](C(N[C@H](C(N[C@@H](C(N2)=O)CC4=CC(C=CC=C5)=C5C=C4)=O)CCC)=O)CC4=CC=CS4)=O	4.54	5.19.E-06	-5.29	41%	149.5
CHP19L	CHP19L_sub8_8	D-Pro	D-Tyr	L-Thi	L-Nva	D-Thi	L-Leu	778.984	778.3182	801.308	801.5269	O=C([C@H]1CCCN1C([C@@H]2CC(C)C)=O)N[C@H](CC(C=C3)=CC=C3O)C(N[C@H](C(N[C@H](C(N[C@@H](C(N2)=O)CC4=CC=CS4)=O)CCC)=O)CC4=CC=CS4)=O	3.32	1.89.E-06	-5.72	79%	38.6
CHP19L	CHP19L_sub8_9	D-Pro	D-Tyr	L-Thi	L-Phe	D-Ala	L-Leu	744.908	744.3305	767.3203	767.5273	O=C([C@H]1CCCN1C([C@@H]2CC(C)C)=O)N[C@H](CC(C=C3)=CC=C3O)C(N[C@H](C(N[C@H](C(N[C@@H](C(N2)=O)C)=O)CC4=CC=CC=C4)=O)CC4=CC=CS4)=O	2.97	7.01.E-07	-6.15	97%	4.6
CHP19L	CHP19L_sub8_10	D-Pro	D-Tyr	L-Thi	L-Phe	D-Leu	L-Leu	786.989	786.3774	809.3672	809.5924	O=C([C@H]1CCCN1C([C@@H]2CC(C)C)=O)N[C@H](CC(C=C3)=CC=C3O)C(N[C@H](C(N[C@H](C(N[C@@H](C(N2)=O)CC(C)C)=O)CC4=CC=CC=C4)=O)CC4=CC=CS4)=O	3.31	5.31.E-06	-5.28	55%	98.2
CHP19L	CHP19L_sub8_11	D-Pro	D-Tyr	L-Thi	L-Phe	D-Nal	L-Leu	871.066	870.3774	893.3672	893.6399	O=C([C@H]1CCCN1C([C@@H]2CC(C)C)=O)N[C@H](CC(C=C3)=CC=C3O)C(N[C@H](C(N[C@H](C(N[C@@H](C(N2)=O)CC4=CC(C=CC=C5)=C5C=C4)=O)CC6=CC=CC=C6)=O)CC4=CC=CS4)=O	5.07	2.06.E-06	-5.69	59%	88
CHP19L	CHP19L_sub8_12	D-Pro	D-Tyr	L-Thi	L-Phe	D-Thi	L-Leu	827.028	826.3182	849.308	849.5622	O=C([C@H]1CCCN1C([C@@H]2CC(C)C)=O)N[C@H](CC(C=C3)=CC=C3O)C(N[C@H](C(N[C@H](C(N[C@@H](C(N2)=O)CC4=CC=CS4)=O)CC5=CC=CC=C5)=O)CC4=CC=CS4)=O	4.02	4.22.E-06	-5.37	79%	39.6
CHP19L	CHP19L_sub8_13	D-Pro	D-Tyr	L-Thi	L-Phe(4F)	D-Ala	L-Leu	762.8984	762.3211	785.3109	785.5182	O=C([C@H]1CCCN1C([C@@H]2CC(C)C)=O)N[C@H](CC(C=C3)=CC=C3O)C(N[C@H](C(N[C@H](C(N[C@@H](C(N2)=O)C)=O)CC4=CC=C(F)C=C4)=O)CC4=CC=CS4)=O	3.28	1.15.E-06	-5.94	96%	7.6
CHP19L	CHP19L_sub8_14	D-Pro	D-Tyr	L-Thi	L-Phe(4F)	D-Leu	L-Leu	804.9794	804.368	827.3578	827.5884	O=C([C@H]1CCCN1C([C@@H]2CC(C)C)=O)N[C@H](CC(C=C3)=CC=C3O)C(N[C@H](C(N[C@H](C(N[C@@H](C(N2)=O)CC(C)C)=O)CC4=CC=C(F)C=C4)=O)CC4=CC=CS4)=O	3.51	5.89.E-06	-5.23	87%	22.5
CHP19L	CHP19L_sub8_15	D-Pro	D-Tyr	L-Thi	L-Phe(4F)	D-Nal	L-Leu	889.0564	888.368	911.3578	911.6297	O=C([C@H]1CCCN1C([C@@H]2CC(C)C)=O)N[C@H](CC(C=C3)=CC=C3O)C(N[C@H](C(N[C@H](C(N[C@@H](C(N2)=O)CC4=CC(C=CC=C5)=C5C=C4)=O)CC6=CC=C(F)C=C6)=O)CC4=CC=CS4)=O	5.12	1.66.E-06	-5.78
CHP19L	CHP19L_sub8_16	D-Pro	D-Tyr	L-Thi	L-Phe(4F)	D-Thi	L-Leu	845.0184	844.3088	867.2986	867.5577	O=C([C@H]1CCCN1C([C@@H]2CC(C)C)=O)N[C@H](CC(C=C3)=CC=C3O)C(N[C@H](C(N[C@H](C(N[C@@H](C(N2)=O)CC4=CC=CS4)=O)CC5=CC=C(F)C=C5)=O)CC4=CC=CS4)=O	4.17	5.34.E-06	-5.27	78%	41.1
CHP37L	CHP37L_sub1_1	L-Pro	L-Tyr	L-Ala	D-Abu	L-Ala	D-Leu	600.717	600.3271	623.3169	623.2133	O=C([C@@H]1CCCN1C([C@H]2CC(C)C)=O)N[C@@H](CC(C=C3)=CC=C3O)C(N[C@H](C(N[C@@H](C(N[C@H](C(N2)=O)C)=O)CC)=O)C)=O	0.79	1.34.E-08	-7.87
CHP37L	CHP37L_sub1_2	L-Pro	L-Tyr	L-Ala	D-Abu	L-Leu	D-Leu	642.798	642.374	665.3638	665.2634	O=C([C@@H]1CCCN1C([C@H]2CC(C)C)=O)N[C@@H](CC(C=C3)=CC=C3O)C(N[C@H](C(N[C@@H](C(N[C@H](C(N2)=O)CC(C)C)=O)CC)=O)C)=O	1.61	1.68.E-07	-6.77
CHP37L	CHP37L_sub1_3	L-Pro	L-Tyr	L-Ala	D-Abu	L-Nal	D-Leu	726.875	726.374	749.3638	749.2908	O=C([C@@H]1CCCN1C([C@H]2CC(C)C)=O)N[C@@H](CC(C=C3)=CC=C3O)C(N[C@H](C(N[C@@H](C(N[C@H](C(N2)=O)CC4=CC(C=CC=C5)=C5C=C4)=O)CC)=O)C)=O	3.05	1.26.E-06	-5.9
CHP37L	CHP37L_sub1_4	L-Pro	L-Tyr	L-Ala	D-Abu	L-Thi	D-Leu	682.837	682.3148	705.3046	705.2392	O=C([C@@H]1CCCN1C([C@H]2CC(C)C)=O)N[C@@H](CC(C=C3)=CC=C3O)C(N[C@H](C(N[C@@H](C(N[C@H](C(N2)=O)CC4=CC=CS4)=O)CC)=O)C)=O	1.96	1.81.E-07	-6.74
CHP37L	CHP37L_sub1_5	L-Pro	L-Tyr	L-Ala	D-Nva	L-Ala	D-Leu	614.744	614.3428	637.3326	637.2335	O=C([C@@H]1CCCN1C([C@H]2CC(C)C)=O)N[C@@H](CC(C=C3)=CC=C3O)C(N[C@H](C(N[C@@H](C(N[C@H](C(N2)=O)C)=O)CCC)=O)C)=O	1.21	2.67.E-08	-7.57
CHP37L	CHP37L_sub1_6	L-Pro	L-Tyr	L-Ala	D-Nva	L-Leu	D-Leu	656.825	656.3897	679.3795	679.2817	O=C([C@@H]1CCCN1C([C@H]2CC(C)C)=O)N[C@@H](CC(C=C3)=CC=C3O)C(N[C@H](C(N[C@@H](C(N[C@H](C(N2)=O)CC(C)C)=O)CCC)=O)C)=O	1.98	3.53.E-07	-6.45
CHP37L	CHP37L_sub1_7	L-Pro	L-Tyr	L-Ala	D-Nva	L-Nal	D-Leu	740.902	740.3897	763.3795	763.3047	O=C([C@@H]1CCCN1C([C@H]2CC(C)C)=O)N[C@@H](CC(C=C3)=CC=C3O)C(N[C@H](C(N[C@@H](C(N[C@H](C(N2)=O)CC(C)C)=O)CCC)=O)C)=O	3.35	2.38.E-06	-5.62
CHP37L	CHP37L_sub1_8	L-Pro	L-Tyr	L-Ala	D-Nva	L-Thi	D-Leu	696.864	696.3305	719.3203	719.2336	O=C([C@@H]1CCCN1C([C@H]2CC(C)C)=O)N[C@@H](CC(C=C3)=CC=C3O)C(N[C@H](C(N[C@@H](C(N[C@H](C(N2)=O)CC4=CC=CS4)=O)CCC)=O)C)=O	2.26	3.83.E-07	-6.42
CHP37L	CHP37L_sub1_9	L-Pro	L-Tyr	L-Ala	D-Phe	L-Ala	D-Leu	662.788	662.3428	685.3326	685.242	O=C([C@@H]1CCCN1C([C@H]2CC(C)C)=O)N[C@@H](CC(C=C3)=CC=C3O)C(N[C@H](C(N[C@@H](C(N[C@H](C(N2)=O)C)=O)CC4=CC=CC=C4)=O)C)=O	1.66	1.30.E-07	-6.89
CHP37L	CHP37L_sub1_10	L-Pro	L-Tyr	L-Ala	D-Phe	L-Leu	D-Leu	704.869	704.3897	727.3795	727.3032	O=C([C@@H]1CCCN1C([C@H]2CC(C)C)=O)N[C@@H](CC(C=C3)=CC=C3O)C(N[C@H](C(N[C@@H](C(N[C@H](C(N2)=O)CC(C)C)=O)CC4=CC=CC=C4)=O)C)=O	2.32	1.55.E-06	-5.81
CHP37L	CHP37L_sub1_11	L-Pro	L-Tyr	L-Ala	D-Phe	L-Nal	D-Leu	788.946	788.3897	811.3795	811.3157	O=C([C@@H]1CCCN1C([C@H]2CC(C)C)=O)N[C@@H](CC(C=C3)=CC=C3O)C(N[C@H](C(N[C@@H](C(N[C@H](C(N2)=O)CC4=CC(C=CC=C5)=C5C=C4)=O)CC6=CC=CC=C6)=O)C)=O	4.12	3.48.E-06	-5.46
CHP37L	CHP37L_sub1_12	L-Pro	L-Tyr	L-Ala	D-Phe	L-Thi	D-Leu	744.908	744.3305	767.3203	767.2518	O=C([C@@H]1CCCN1C([C@H]2CC(C)C)=O)N[C@@H](CC(C=C3)=CC=C3O)C(N[C@H](C(N[C@@H](C(N[C@H](C(N2)=O)CC4=CC=CS4)=O)CC5=CC=CC=C5)=O)C)=O	3.03	1.47.E-06	-5.83
CHP37L	CHP37L_sub1_13	L-Pro	L-Tyr	L-Ala	D-Phe(4F)	L-Ala	D-Leu	680.7784	680.3334	703.3232	703.2295	O=C([C@@H]1CCCN1C([C@H]2CC(C)C)=O)N[C@@H](CC(C=C3)=CC=C3O)C(N[C@H](C(N[C@@H](C(N[C@H](C(N2)=O)C)=O)CC4=CC=C(F)C=C4)=O)C)=O	1.87	2.12.E-07	-6.67
CHP37L	CHP37L_sub1_14	L-Pro	L-Tyr	L-Ala	D-Phe(4F)	L-Leu	D-Leu	722.8594	722.3803	745.3701	745.2831	O=C([C@@H]1CCCN1C([C@H]2CC(C)C)=O)N[C@@H](CC(C=C3)=CC=C3O)C(N[C@H](C(N[C@@H](C(N[C@H](C(N2)=O)CC(C)C)=O)CC4=CC=C(F)C=C4)=O)C)=O	2.16	1.86.E-06	-5.73
CHP37L	CHP37L_sub1_15	L-Pro	L-Tyr	L-Ala	D-Phe(4F)	L-Nal	D-Leu	806.9364	806.3803	829.3701	829.3095	O=C([C@@H]1CCCN1C([C@H]2CC(C)C)=O)N[C@@H](CC(C=C3)=CC=C3O)C(N[C@H](C(N[C@@H](C(N[C@H](C(N2)=O)CC4=CC(C=CC=C5)=C5C=C4)=O)CC6=CC=C(F)C=C6)=O)C)=O	3.99	3.27.E-06	-5.49
CHP37L	CHP37L_sub1_16	L-Pro	L-Tyr	L-Ala	D-Phe(4F)	L-Thi	D-Leu	762.8984	762.3211	785.3109	785.237	O=C([C@@H]1CCCN1C([C@H]2CC(C)C)=O)N[C@@H](CC(C=C3)=CC=C3O)C(N[C@H](C(N[C@@H](C(N[C@H](C(N2)=O)CC4=CC=CS4)=O)CC5=CC=C(F)C=C5)=O)C)=O	3.31	2.11.E-06	-5.68
CHP37L	CHP37L_sub2_1	L-Pro	L-Tyr	L-Abu	D-Abu	L-Ala	D-Leu	614.744	614.3427	637.3325	637.2566	O=C([C@@H]1CCCN1C([C@H]2CC(C)C)=O)N[C@@H](CC(C=C3)=CC=C3O)C(N[C@H](C(N[C@@H](C(N[C@H](C(N2)=O)C)=O)CC)=O)CC)=O	1.09	1.39.E-08	-7.86
CHP37L	CHP37L_sub2_2	L-Pro	L-Tyr	L-Abu	D-Abu	L-Leu	D-Leu	656.825	656.3896	679.3794	679.3244	O=C([C@@H]1CCCN1C([C@H]2CC(C)C)=O)N[C@@H](CC(C=C3)=CC=C3O)C(N[C@H](C(N[C@@H](C(N[C@H](C(N2)=O)CC(C)C)=O)CC)=O)CC)=O	1.98	2.19.E-07	-6.66
CHP37L	CHP37L_sub2_3	L-Pro	L-Tyr	L-Abu	D-Abu	L-Nal	D-Leu	740.902	740.3896	763.3794	763.3442	O=C([C@@H]1CCCN1C([C@H]2CC(C)C)=O)N[C@@H](CC(C=C3)=CC=C3O)C(N[C@H](C(N[C@@H](C(N[C@H](C(N2)=O)CC4=CC(C=CC=C5)=C5C=C4)=O)CC)=O)CC)=O	3.45	1.47.E-06	-5.83
CHP37L	CHP37L_sub2_4	L-Pro	L-Tyr	L-Abu	D-Abu	L-Thi	D-Leu	696.864	696.3304	719.3202	719.2782	O=C([C@@H]1CCCN1C([C@H]2CC(C)C)=O)N[C@@H](CC(C=C3)=CC=C3O)C(N[C@H](C(N[C@@H](C(N[C@H](C(N2)=O)CC4=CC=CS4)=O)CC)=O)CC)=O	2.31	2.42.E-07	-6.62
CHP37L	CHP37L_sub2_5	L-Pro	L-Tyr	L-Abu	D-Nva	L-Ala	D-Leu	628.771	628.3584	651.3482	651.28	O=C([C@@H]1CCCN1C([C@H]2CC(C)C)=O)N[C@@H](CC(C=C3)=CC=C3O)C(N[C@H](C(N[C@@H](C(N[C@H](C(N2)=O)C)=O)CCC)=O)CC)=O	1.47	3.03.E-08	-7.52
CHP37L	CHP37L_sub2_6	L-Pro	L-Tyr	L-Abu	D-Nva	L-Leu	D-Leu	670.852	670.4053	693.3951	693.3343	O=C([C@@H]1CCCN1C([C@H]2CC(C)C)=O)N[C@@H](CC(C=C3)=CC=C3O)C(N[C@H](C(N[C@@H](C(N[C@H](C(N2)=O)CC(C)C)=O)CCC)=O)CC)=O	2.3	4.80.E-07	-6.32
CHP37L	CHP37L_sub2_7	L-Pro	L-Tyr	L-Abu	D-Nva	L-Nal	D-Leu	754.929	754.4053	777.3951	777.354	O=C([C@@H]1CCCN1C([C@H]2CC(C)C)=O)N[C@@H](CC(C=C3)=CC=C3O)C(N[C@H](C(N[C@@H](C(N[C@H](C(N2)=O)CC4=CC(C=CC=C5)=C5C=C4)=O)CCC)=O)CC)=O	3.68	2.48.E-06	-5.61
CHP37L	CHP37L_sub2_8	L-Pro	L-Tyr	L-Abu	D-Nva	L-Thi	D-Leu	710.891	710.3461	733.3359	733.2838	O=C([C@@H]1CCCN1C([C@H]2CC(C)C)=O)N[C@@H](CC(C=C3)=CC=C3O)C(N[C@H](C(N[C@@H](C(N[C@H](C(N2)=O)CC4=CC=CS4)=O)CCC)=O)CC)=O	2.61	4.66.E-07	-6.33
CHP37L	CHP37L_sub2_9	L-Pro	L-Tyr	L-Abu	D-Phe	L-Ala	D-Leu	676.815	676.3584	699.3482	699.2882	O=C([C@@H]1CCCN1C([C@H]2CC(C)C)=O)N[C@@H](CC(C=C3)=CC=C3O)C(N[C@H](C(N[C@@H](C(N[C@H](C(N2)=O)C)=O)CC4=CC=CC=C4)=O)CC)=O	1.97	1.51.E-07	-6.82
CHP37L	CHP37L_sub2_10	L-Pro	L-Tyr	L-Abu	D-Phe	L-Leu	D-Leu	718.896	718.4053	741.3951	741.3533	O=C([C@@H]1CCCN1C([C@H]2CC(C)C)=O)N[C@@H](CC(C=C3)=CC=C3O)C(N[C@H](C(N[C@@H](C(N[C@H](C(N2)=O)CC(C)C)=O)CC4=CC=CC=C4)=O)CC)=O	2.83	1.83.E-06	-5.74
CHP37L	CHP37L_sub2_11	L-Pro	L-Tyr	L-Abu	D-Phe	L-Nal	D-Leu	802.973	802.4053	825.3951	825.3625	O=C([C@@H]1CCCN1C([C@H]2CC(C)C)=O)N[C@@H](CC(C=C3)=CC=C3O)C(N[C@H](C(N[C@@H](C(N[C@H](C(N2)=O)CC4=CC(C=CC=C5)=C5C=C4)=O)CC6=CC=CC=C6)=O)CC)=O	4.42	2.99.E-06	-5.52
CHP37L	CHP37L_sub2_12	L-Pro	L-Tyr	L-Abu	D-Phe	L-Thi	D-Leu	758.935	758.3461	781.3359	781.2979	O=C([C@@H]1CCCN1C([C@H]2CC(C)C)=O)N[C@@H](CC(C=C3)=CC=C3O)C(N[C@H](C(N[C@@H](C(N[C@H](C(N2)=O)CC4=CC=CS4)=O)CC5=CC=CC=C5)=O)CC)=O	3.33	1.46.E-06	-5.84
CHP37L	CHP37L_sub2_13	L-Pro	L-Tyr	L-Abu	D-Phe(4F)	L-Ala	D-Leu	694.8054	694.349	717.3388	717.2804	O=C([C@@H]1CCCN1C([C@H]2CC(C)C)=O)N[C@@H](CC(C=C3)=CC=C3O)C(N[C@H](C(N[C@@H](C(N[C@H](C(N2)=O)C)=O)CC4=CC=C(F)C=C4)=O)CC)=O	2.11	2.36.E-07	-6.63
CHP37L	CHP37L_sub2_14	L-Pro	L-Tyr	L-Abu	D-Phe(4F)	L-Leu	D-Leu	736.8864	736.3959	759.3857	759.3289	O=C([C@@H]1CCCN1C([C@H]2CC(C)C)=O)N[C@@H](CC(C=C3)=CC=C3O)C(N[C@H](C(N[C@@H](C(N[C@H](C(N2)=O)CC(C)C)=O)CC4=CC=C(F)C=C4)=O)CC)=O	2.66	2.09.E-06	-5.68
CHP37L	CHP37L_sub2_15	L-Pro	L-Tyr	L-Abu	D-Phe(4F)	L-Nal	D-Leu	820.9634	820.3959	843.3857	843.3632	O=C([C@@H]1CCCN1C([C@H]2CC(C)C)=O)N[C@@H](CC(C=C3)=CC=C3O)C(N[C@H](C(N[C@@H](C(N[C@H](C(N2)=O)CC4=CC(C=CC=C5)=C5C=C4)=O)CC6=CC=C(F)C=C6)=O)CC)=O	4.36	2.71.E-06	-5.57
CHP37L	CHP37L_sub2_16	L-Pro	L-Tyr	L-Abu	D-Phe(4F)	L-Thi	D-Leu	776.9254	776.3367	799.3265	799.286	O=C([C@@H]1CCCN1C([C@H]2CC(C)C)=O)N[C@@H](CC(C=C3)=CC=C3O)C(N[C@H](C(N[C@@H](C(N[C@H](C(N2)=O)CC4=CC=CS4)=O)CC5=CC=C(F)C=C5)=O)CC)=O	3.56	2.20.E-06	-5.66
CHP37L	CHP37L_sub3_1	L-Pro	L-Tyr	L-Nva	D-Abu	L-Ala	D-Leu	628.771	628.3584	651.3482	651.3316	O=C([C@@H]1CCCN1C([C@H]2CC(C)C)=O)N[C@@H](CC(C=C3)=CC=C3O)C(N[C@H](C(N[C@@H](C(N[C@H](C(N2)=O)C)=O)CC)=O)CCC)=O	1.46	2.99.E-08	-7.52
CHP37L	CHP37L_sub3_2	L-Pro	L-Tyr	L-Nva	D-Abu	L-Leu	D-Leu	670.852	670.4053	693.3951	693.3645	O=C([C@@H]1CCCN1C([C@H]2CC(C)C)=O)N[C@@H](CC(C=C3)=CC=C3O)C(N[C@H](C(N[C@@H](C(N[C@H](C(N2)=O)CC(C)C)=O)CC)=O)CCC)=O	2.3	5.18.E-07	-6.29
CHP37L	CHP37L_sub3_3	L-Pro	L-Tyr	L-Nva	D-Abu	L-Nal	D-Leu	754.929	754.4053	777.3951	777.417	O=C([C@@H]1CCCN1C([C@H]2CC(C)C)=O)N[C@@H](CC(C=C3)=CC=C3O)C(N[C@H](C(N[C@@H](C(N[C@H](C(N2)=O)CC4=CC(C=CC=C5)=C5C=C4)=O)CC)=O)CCC)=O	3.68	2.29.E-06	-5.64
CHP37L	CHP37L_sub3_4	L-Pro	L-Tyr	L-Nva	D-Abu	L-Thi	D-Leu	710.891	710.3461	733.3359	733.3441	O=C([C@@H]1CCCN1C([C@H]2CC(C)C)=O)N[C@@H](CC(C=C3)=CC=C3O)C(N[C@H](C(N[C@@H](C(N[C@H](C(N2)=O)CC4=CC=CS4)=O)CC)=O)CCC)=O	2.61	4.98.E-07	-6.3
CHP37L	CHP37L_sub3_5	L-Pro	L-Tyr	L-Nva	D-Nva	L-Ala	D-Leu	642.798	642.3741	665.3639	665.3493	O=C([C@@H]1CCCN1C([C@H]2CC(C)C)=O)N[C@@H](CC(C=C3)=CC=C3O)C(N[C@H](C(N[C@@H](C(N[C@H](C(N2)=O)C)=O)CCC)=O)CCC)=O	1.86	6.46.E-08	-7.19
CHP37L	CHP37L_sub3_6	L-Pro	L-Tyr	L-Nva	D-Nva	L-Leu	D-Leu	684.879	684.421	707.4108	707.4076	O=C([C@@H]1CCCN1C([C@H]2CC(C)C)=O)N[C@@H](CC(C=C3)=CC=C3O)C(N[C@H](C(N[C@@H](C(N[C@H](C(N2)=O)CC(C)C)=O)CCC)=O)CCC)=O	2.57	1.00.E-06	-6
CHP37L	CHP37L_sub3_7	L-Pro	L-Tyr	L-Nva	D-Nva	L-Nal	D-Leu	768.956	768.421	791.4108	791.4312	O=C([C@@H]1CCCN1C([C@H]2CC(C)C)=O)N[C@@H](CC(C=C3)=CC=C3O)C(N[C@H](C(N[C@@H](C(N[C@H](C(N2)=O)CC4=CC(C=CC=C5)=C5C=C4)=O)CCC)=O)CCC)=O	3.97	3.17.E-06	-5.5
CHP37L	CHP37L_sub3_8	L-Pro	L-Tyr	L-Nva	D-Nva	L-Thi	D-Leu	724.918	724.3618	747.3516	747.3611	O=C([C@@H]1CCCN1C([C@H]2CC(C)C)=O)N[C@@H](CC(C=C3)=CC=C3O)C(N[C@H](C(N[C@@H](C(N[C@H](C(N2)=O)CC4=CC=CS4)=O)CCC)=O)CCC)=O	2.91	9.57.E-07	-6.02
CHP37L	CHP37L_sub3_9	L-Pro	L-Tyr	L-Nva	D-Phe	L-Ala	D-Leu	690.842	690.3741	713.3639	713.3665	O=C([C@@H]1CCCN1C([C@H]2CC(C)C)=O)N[C@@H](CC(C=C3)=CC=C3O)C(N[C@H](C(N[C@@H](C(N[C@H](C(N2)=O)C)=O)CC4=CC=CC=C4)=O)CCC)=O	2.36	3.37.E-07	-6.47
CHP37L	CHP37L_sub3_10	L-Pro	L-Tyr	L-Nva	D-Phe	L-Leu	D-Leu	732.923	732.421	755.4108	755.4214	O=C([C@@H]1CCCN1C([C@H]2CC(C)C)=O)N[C@@H](CC(C=C3)=CC=C3O)C(N[C@H](C(N[C@@H](C(N[C@H](C(N2)=O)CC(C)C)=O)CC4=CC=CC=C4)=O)CCC)=O	3.14	2.96.E-06	-5.53
CHP37L	CHP37L_sub3_11	L-Pro	L-Tyr	L-Nva	D-Phe	L-Nal	D-Leu	817	816.421	839.4108	839.4458	O=C([C@@H]1CCCN1C([C@H]2CC(C)C)=O)N[C@@H](CC(C=C3)=CC=C3O)C(N[C@H](C(N[C@@H](C(N[C@H](C(N2)=O)CC4=CC(C=CC=C5)=C5C=C4)=O)CC6=CC=CC=C6)=O)CCC)=O	4.68	1.93.E-06	-5.71
CHP37L	CHP37L_sub3_12	L-Pro	L-Tyr	L-Nva	D-Phe	L-Thi	D-Leu	772.962	772.3618	795.3516	795.3803	O=C([C@@H]1CCCN1C([C@H]2CC(C)C)=O)N[C@@H](CC(C=C3)=CC=C3O)C(N[C@H](C(N[C@@H](C(N[C@H](C(N2)=O)CC4=CC=CS4)=O)CC5=CC=CC=C5)=O)CCC)=O	3.49	2.49.E-06	-5.6
CHP37L	CHP37L_sub3_13	L-Pro	L-Tyr	L-Nva	D-Phe(4F)	L-Ala	D-Leu	708.8324	708.3647	731.3545	731.3566	O=C([C@@H]1CCCN1C([C@H]2CC(C)C)=O)N[C@@H](CC(C=C3)=CC=C3O)C(N[C@H](C(N[C@@H](C(N[C@H](C(N2)=O)C)=O)CC4=CC=C(F)C=C4)=O)CCC)=O	2.26	5.21.E-07	-6.28
CHP37L	CHP37L_sub3_14	L-Pro	L-Tyr	L-Nva	D-Phe(4F)	L-Leu	D-Leu	750.9134	750.4116	773.4014	773.4167	O=C([C@@H]1CCCN1C([C@H]2CC(C)C)=O)N[C@@H](CC(C=C3)=CC=C3O)C(N[C@H](C(N[C@@H](C(N[C@H](C(N2)=O)CC(C)C)=O)CC4=CC=C(F)C=C4)=O)CCC)=O	3.09	3.05.E-06	-5.52
CHP37L	CHP37L_sub3_15	L-Pro	L-Tyr	L-Nva	D-Phe(4F)	L-Nal	D-Leu	834.9904	834.4116	857.4014	857.4409	O=C([C@@H]1CCCN1C([C@H]2CC(C)C)=O)N[C@@H](CC(C=C3)=CC=C3O)C(N[C@H](C(N[C@@H](C(N[C@H](C(N2)=O)CC4=CC(C=CC=C5)=C5C=C4)=O)CC6=CC=C(F)C=C6)=O)CCC)=O	4.63	1.30.E-06	-5.89
CHP37L	CHP37L_sub3_16	L-Pro	L-Tyr	L-Nva	D-Phe(4F)	L-Thi	D-Leu	790.9524	790.3524	813.3422	813.3678	O=C([C@@H]1CCCN1C([C@H]2CC(C)C)=O)N[C@@H](CC(C=C3)=CC=C3O)C(N[C@H](C(N[C@@H](C(N[C@H](C(N2)=O)CC4=CC=CS4)=O)CC5=CC=C(F)C=C5)=O)CCC)=O	3.73	3.06.E-06	-5.51
CHP37L	CHP37L_sub4_1	L-Pro	L-Tyr	L-Leu	D-Abu	L-Ala	D-Leu	642.798	642.374	665.3638	665.392	O=C([C@@H]1CCCN1C([C@H]2CC(C)C)=O)N[C@@H](CC(C=C3)=CC=C3O)C(N[C@H](C(N[C@@H](C(N[C@H](C(N2)=O)C)=O)CC)=O)CC(C)C)=O	1.59	4.62.E-08	-7.34
CHP37L	CHP37L_sub4_2	L-Pro	L-Tyr	L-Leu	D-Abu	L-Leu	D-Leu	684.879	684.4209	707.4107	707.4462	O=C([C@@H]1CCCN1C([C@H]2CC(C)C)=O)N[C@@H](CC(C=C3)=CC=C3O)C(N[C@H](C(N[C@@H](C(N[C@H](C(N2)=O)CC(C)C)=O)CC)=O)CC(C)C)=O	2.49	7.93.E-07	-6.1
CHP37L	CHP37L_sub4_3	L-Pro	L-Tyr	L-Leu	D-Abu	L-Nal	D-Leu	768.956	768.4209	791.4107	791.4729	O=C([C@@H]1CCCN1C([C@H]2CC(C)C)=O)N[C@@H](CC(C=C3)=CC=C3O)C(N[C@H](C(N[C@@H](C(N[C@H](C(N2)=O)CC4=CC(C=CC=C5)=C5C=C4)=O)CC)=O)CC(C)C)=O	3.87	3.37.E-06	-5.47
CHP37L	CHP37L_sub4_4	L-Pro	L-Tyr	L-Leu	D-Abu	L-Thi	D-Leu	724.918	724.3617	747.3515	747.4085	O=C([C@@H]1CCCN1C([C@H]2CC(C)C)=O)N[C@@H](CC(C=C3)=CC=C3O)C(N[C@H](C(N[C@@H](C(N[C@H](C(N2)=O)CC4=CC=CS4)=O)CC)=O)CC(C)C)=O	2.5	6.95.E-07	-6.16
CHP37L	CHP37L_sub4_5	L-Pro	L-Tyr	L-Leu	D-Nva	L-Ala	D-Leu	656.825	656.3897	679.3795	679.4107	O=C([C@@H]1CCCN1C([C@H]2CC(C)C)=O)N[C@@H](CC(C=C3)=CC=C3O)C(N[C@H](C(N[C@@H](C(N[C@H](C(N2)=O)C)=O)CCC)=O)CC(C)C)=O	1.98	1.02.E-07	-6.99
CHP37L	CHP37L_sub4_6	L-Pro	L-Tyr	L-Leu	D-Nva	L-Leu	D-Leu	698.906	698.4366	721.4264	721.4687	O=C([C@@H]1CCCN1C([C@H]2CC(C)C)=O)N[C@@H](CC(C=C3)=CC=C3O)C(N[C@H](C(N[C@@H](C(N[C@H](C(N2)=O)CC(C)C)=O)CCC)=O)CC(C)C)=O	2.72	1.41.E-06	-5.85
CHP37L	CHP37L_sub4_7	L-Pro	L-Tyr	L-Leu	D-Nva	L-Nal	D-Leu	782.983	782.4366	805.4264	805.4973	O=C([C@@H]1CCCN1C([C@H]2CC(C)C)=O)N[C@@H](CC(C=C3)=CC=C3O)C(N[C@H](C(N[C@@H](C(N[C@H](C(N2)=O)CC4=CC(C=CC=C5)=C5C=C4)=O)CCC)=O)CC(C)C)=O	4.09	3.77.E-06	-5.42
CHP37L	CHP37L_sub4_8	L-Pro	L-Tyr	L-Leu	D-Nva	L-Thi	D-Leu	738.945	738.3774	761.3672	761.4223	O=C([C@@H]1CCCN1C([C@H]2CC(C)C)=O)N[C@@H](CC(C=C3)=CC=C3O)C(N[C@H](C(N[C@@H](C(N[C@H](C(N2)=O)CC4=CC=CS4)=O)CCC)=O)CC(C)C)=O	2.87	1.25.E-06	-5.9
CHP37L	CHP37L_sub4_9	L-Pro	L-Tyr	L-Leu	D-Phe	L-Ala	D-Leu	704.869	704.3897	727.3795	727.4214	O=C([C@@H]1CCCN1C([C@H]2CC(C)C)=O)N[C@@H](CC(C=C3)=CC=C3O)C(N[C@H](C(N[C@@H](C(N[C@H](C(N2)=O)C)=O)CC4=CC=CC=C4)=O)CC(C)C)=O	2.32	4.45.E-07	-6.35
CHP37L	CHP37L_sub4_10	L-Pro	L-Tyr	L-Leu	D-Phe	L-Leu	D-Leu	746.95	746.4366	769.4264	769.4825	O=C([C@@H]1CCCN1C([C@H]2CC(C)C)=O)N[C@@H](CC(C=C3)=CC=C3O)C(N[C@H](C(N[C@@H](C(N[C@H](C(N2)=O)CC(C)C)=O)CC4=CC=CC=C4)=O)CC(C)C)=O	3.05	3.56.E-06	-5.45
CHP37L	CHP37L_sub4_11	L-Pro	L-Tyr	L-Leu	D-Phe	L-Nal	D-Leu	831.027	830.4366	853.4264	853.5129	O=C([C@@H]1CCCN1C([C@H]2CC(C)C)=O)N[C@@H](CC(C=C3)=CC=C3O)C(N[C@H](C(N[C@@H](C(N[C@H](C(N2)=O)CC4=CC(C=CC=C5)=C5C=C4)=O)CC6=CC=CC=C6)=O)CC(C)C)=O	4.71	1.48.E-06	-5.83
CHP37L	CHP37L_sub4_12	L-Pro	L-Tyr	L-Leu	D-Phe	L-Thi	D-Leu	786.989	786.3774	809.3672	809.4424	O=C([C@@H]1CCCN1C([C@H]2CC(C)C)=O)N[C@@H](CC(C=C3)=CC=C3O)C(N[C@H](C(N[C@@H](C(N[C@H](C(N2)=O)CC4=CC=CS4)=O)CC5=CC=CC=C5)=O)CC(C)C)=O	3.31	3.33.E-06	-5.48
CHP37L	CHP37L_sub4_13	L-Pro	L-Tyr	L-Leu	D-Phe(4F)	L-Ala	D-Leu	722.8594	722.3803	745.3701	745.4171	O=C([C@@H]1CCCN1C([C@H]2CC(C)C)=O)N[C@@H](CC(C=C3)=CC=C3O)C(N[C@H](C(N[C@@H](C(N[C@H](C(N2)=O)C)=O)CC4=CC=C(F)C=C4)=O)CC(C)C)=O	2.16	6.75.E-07	-6.17
CHP37L	CHP37L_sub4_14	L-Pro	L-Tyr	L-Leu	D-Phe(4F)	L-Leu	D-Leu	764.9404	764.4272	787.417	787.4754	O=C([C@@H]1CCCN1C([C@H]2CC(C)C)=O)N[C@@H](CC(C=C3)=CC=C3O)C(N[C@H](C(N[C@@H](C(N[C@H](C(N2)=O)CC(C)C)=O)CC4=CC=C(F)C=C4)=O)CC(C)C)=O	3.06	3.98.E-06	-5.4
CHP37L	CHP37L_sub4_15	L-Pro	L-Tyr	L-Leu	D-Phe(4F)	L-Nal	D-Leu	849.0174	848.4272	871.417	871.5095	O=C([C@@H]1CCCN1C([C@H]2CC(C)C)=O)N[C@@H](CC(C=C3)=CC=C3O)C(N[C@H](C(N[C@@H](C(N[C@H](C(N2)=O)CC4=CC(C=CC=C5)=C5C=C4)=O)CC6=CC=C(F)C=C6)=O)CC(C)C)=O	4.65	9.15.E-07	-6.04
CHP37L	CHP37L_sub4_16	L-Pro	L-Tyr	L-Leu	D-Phe(4F)	L-Thi	D-Leu	804.9794	804.368	827.3578	827.4343	O=C([C@@H]1CCCN1C([C@H]2CC(C)C)=O)N[C@@H](CC(C=C3)=CC=C3O)C(N[C@H](C(N[C@@H](C(N[C@H](C(N2)=O)CC4=CC=CS4)=O)CC5=CC=C(F)C=C5)=O)CC(C)C)=O	3.53	3.74.E-06	-5.43
CHP37L	CHP37L_sub5_1	L-Pro	L-Tyr	L-Phe	D-Abu	L-Ala	D-Leu	676.815	676.3584	699.3482	699.3907	O=C([C@@H]1CCCN1C([C@H]2CC(C)C)=O)N[C@@H](CC(C=C3)=CC=C3O)C(N[C@H](C(N[C@@H](C(N[C@H](C(N2)=O)C)=O)CC)=O)CC4=CC=CC=C4)=O	1.97	1.50.E-07	-6.83
CHP37L	CHP37L_sub5_2	L-Pro	L-Tyr	L-Phe	D-Abu	L-Leu	D-Leu	718.896	718.4053	741.3951	741.4444	O=C([C@@H]1CCCN1C([C@H]2CC(C)C)=O)N[C@@H](CC(C=C3)=CC=C3O)C(N[C@H](C(N[C@@H](C(N[C@H](C(N2)=O)CC(C)C)=O)CC)=O)CC4=CC=CC=C4)=O	2.83	2.09.E-06	-5.68
CHP37L	CHP37L_sub5_3	L-Pro	L-Tyr	L-Phe	D-Abu	L-Nal	D-Leu	802.973	802.4053	825.3951	825.4705	O=C([C@@H]1CCCN1C([C@H]2CC(C)C)=O)N[C@@H](CC(C=C3)=CC=C3O)C(N[C@H](C(N[C@@H](C(N[C@H](C(N2)=O)CC4=CC(C=CC=C5)=C5C=C4)=O)CC)=O)CC4=CC=CC=C4)=O	4.42	2.56.E-06	-5.59
CHP37L	CHP37L_sub5_4	L-Pro	L-Tyr	L-Phe	D-Abu	L-Thi	D-Leu	758.935	758.3461	781.3359	781.4037	O=C([C@@H]1CCCN1C([C@H]2CC(C)C)=O)N[C@@H](CC(C=C3)=CC=C3O)C(N[C@H](C(N[C@@H](C(N[C@H](C(N2)=O)CC4=CC=CS4)=O)CC)=O)CC4=CC=CC=C4)=O	3.32	1.75.E-06	-5.76
CHP37L	CHP37L_sub5_5	L-Pro	L-Tyr	L-Phe	D-Nva	L-Ala	D-Leu	690.842	690.3741	713.3639	713.41	O=C([C@@H]1CCCN1C([C@H]2CC(C)C)=O)N[C@@H](CC(C=C3)=CC=C3O)C(N[C@H](C(N[C@@H](C(N[C@H](C(N2)=O)C)=O)CCC)=O)CC4=CC=CC=C4)=O	2.36	3.11.E-07	-6.51
CHP37L	CHP37L_sub5_6	L-Pro	L-Tyr	L-Phe	D-Nva	L-Leu	D-Leu	732.923	732.421	755.4108	755.4638	O=C([C@@H]1CCCN1C([C@H]2CC(C)C)=O)N[C@@H](CC(C=C3)=CC=C3O)C(N[C@H](C(N[C@@H](C(N[C@H](C(N2)=O)CC(C)C)=O)CCC)=O)CC4=CC=CC=C4)=O	3.13	2.89.E-06	-5.54
CHP37L	CHP37L_sub5_7	L-Pro	L-Tyr	L-Phe	D-Nva	L-Nal	D-Leu	817	816.421	839.4108	839.4875	O=C([C@@H]1CCCN1C([C@H]2CC(C)C)=O)N[C@@H](CC(C=C3)=CC=C3O)C(N[C@H](C(N[C@@H](C(N[C@H](C(N2)=O)CC4=CC(C=CC=C5)=C5C=C4)=O)CCC)=O)CC4=CC=CC=C4)=O	4.67	1.42.E-06	-5.85
CHP37L	CHP37L_sub5_8	L-Pro	L-Tyr	L-Phe	D-Nva	L-Thi	D-Leu	772.962	772.3618	795.3516	795.4172	O=C([C@@H]1CCCN1C([C@H]2CC(C)C)=O)N[C@@H](CC(C=C3)=CC=C3O)C(N[C@H](C(N[C@@H](C(N[C@H](C(N2)=O)CC4=CC=CS4)=O)CCC)=O)CC4=CC=CC=C4)=O	3.49	2.45.E-06	-5.61
CHP37L	CHP37L_sub5_9	L-Pro	L-Tyr	L-Phe	D-Phe	L-Ala	D-Leu	738.886	738.3741	761.3639	761.4197	O=C([C@@H]1CCCN1C([C@H]2CC(C)C)=O)N[C@@H](CC(C=C3)=CC=C3O)C(N[C@H](C(N[C@@H](C(N[C@H](C(N2)=O)C)=O)CC4=CC=CC=C4)=O)CC4=CC=CC=C4)=O	2.92	2.21.E-06	-5.66
CHP37L	CHP37L_sub5_10	L-Pro	L-Tyr	L-Phe	D-Phe	L-Leu	D-Leu	780.967	780.421	803.4108	803.4802	O=C([C@@H]1CCCN1C([C@H]2CC(C)C)=O)N[C@@H](CC(C=C3)=CC=C3O)C(N[C@H](C(N[C@@H](C(N[C@H](C(N2)=O)CC(C)C)=O)CC4=CC=CC=C4)=O)CC4=CC=CC=C4)=O	3.66	3.61.E-06	-5.44
CHP37L	CHP37L_sub5_11	L-Pro	L-Tyr	L-Phe	D-Phe	L-Nal	D-Leu	865.044	864.421	887.4108	887.5049	O=C([C@@H]1CCCN1C([C@H]2CC(C)C)=O)N[C@@H](CC(C=C3)=CC=C3O)C(N[C@H](C(N[C@@H](C(N[C@H](C(N2)=O)CC4=CC(C=CC=C5)=C5C=C4)=O)CC6=CC=CC=C6)=O)CC4=CC=CC=C4)=O	5.27	1.66.E-07	-6.78
CHP37L	CHP37L_sub5_12	L-Pro	L-Tyr	L-Phe	D-Phe	L-Thi	D-Leu	821.006	820.3618	843.3516	843.4397	O=C([C@@H]1CCCN1C([C@H]2CC(C)C)=O)N[C@@H](CC(C=C3)=CC=C3O)C(N[C@H](C(N[C@@H](C(N[C@H](C(N2)=O)CC4=CC=CS4)=O)CC5=CC=CC=C5)=O)CC4=CC=CC=C4)=O	4.21	2.38.E-06	-5.62
CHP37L	CHP37L_sub5_13	L-Pro	L-Tyr	L-Phe	D-Phe(4F)	L-Ala	D-Leu	756.8764	756.3647	779.3545	779.4167	O=C([C@@H]1CCCN1C([C@H]2CC(C)C)=O)N[C@@H](CC(C=C3)=CC=C3O)C(N[C@H](C(N[C@@H](C(N[C@H](C(N2)=O)C)=O)CC4=CC=C(F)C=C4)=O)CC4=CC=CC=C4)=O	2.99	2.86.E-06	-5.54
CHP37L	CHP37L_sub5_14	L-Pro	L-Tyr	L-Phe	D-Phe(4F)	L-Leu	D-Leu	798.9574	798.4116	821.4014	821.473	O=C([C@@H]1CCCN1C([C@H]2CC(C)C)=O)N[C@@H](CC(C=C3)=CC=C3O)C(N[C@H](C(N[C@@H](C(N[C@H](C(N2)=O)CC(C)C)=O)CC4=CC=C(F)C=C4)=O)CC4=CC=CC=C4)=O	3.6	3.40.E-06	-5.47
CHP37L	CHP37L_sub5_15	L-Pro	L-Tyr	L-Phe	D-Phe(4F)	L-Nal	D-Leu	883.0344	882.4116	905.4014	905.4978	O=C([C@@H]1CCCN1C([C@H]2CC(C)C)=O)N[C@@H](CC(C=C3)=CC=C3O)C(N[C@H](C(N[C@@H](C(N[C@H](C(N2)=O)CC4=CC(C=CC=C5)=C5C=C4)=O)CC6=CC=C(F)C=C6)=O)CC4=CC=CC=C4)=O	5.2	1.13.E-07	-6.95
CHP37L	CHP37L_sub5_16	L-Pro	L-Tyr	L-Phe	D-Phe(4F)	L-Thi	D-Leu	838.9964	838.3524	861.3422	861.4259	O=C([C@@H]1CCCN1C([C@H]2CC(C)C)=O)N[C@@H](CC(C=C3)=CC=C3O)C(N[C@H](C(N[C@@H](C(N[C@H](C(N2)=O)CC4=CC=CS4)=O)CC5=CC=C(F)C=C5)=O)CC4=CC=CC=C4)=O	4.32	2.04.E-06	-5.69
CHP37L	CHP37L_sub6_1	L-Pro	L-Tyr	L-Nal	D-Abu	L-Ala	D-Leu	726.875	726.374	749.3638	749.4944	O=C([C@@H]1CCCN1C([C@H]2CC(C)C)=O)N[C@@H](CC(C=C3)=CC=C3O)C(N[C@H](C(N[C@@H](C(N[C@H](C(N2)=O)C)=O)CC)=O)CC4=CC(C=CC=C5)=C5C=C4)=O	3.06	8.50.E-07	-6.07
CHP37L	CHP37L_sub6_2	L-Pro	L-Tyr	L-Nal	D-Abu	L-Leu	D-Leu	768.956	768.4209	791.4107	791.5645	O=C([C@@H]1CCCN1C([C@H]2CC(C)C)=O)N[C@@H](CC(C=C3)=CC=C3O)C(N[C@H](C(N[C@@H](C(N[C@H](C(N2)=O)CC(C)C)=O)CC)=O)CC4=CC(C=CC=C5)=C5C=C4)=O	3.86	1.19.E-06	-5.92
CHP37L	CHP37L_sub6_3	L-Pro	L-Tyr	L-Nal	D-Abu	L-Nal	D-Leu	853.033	852.4209	875.4107	875.6515	O=C([C@@H]1CCCN1C([C@H]2CC(C)C)=O)N[C@@H](CC(C=C3)=CC=C3O)C(N[C@H](C(N[C@@H](C(N[C@H](C(N2)=O)CC4=CC(C=CC=C5)=C5C=C4)=O)CC)=O)CC4=CC(C=CC=C5)=C5C=C4)=O	5.37	8.03.E-08	-7.1
CHP37L	CHP37L_sub6_4	L-Pro	L-Tyr	L-Nal	D-Abu	L-Thi	D-Leu	808.995	808.3617	831.3515	831.5452	O=C([C@@H]1CCCN1C([C@H]2CC(C)C)=O)N[C@@H](CC(C=C3)=CC=C3O)C(N[C@H](C(N[C@@H](C(N[C@H](C(N2)=O)CC4=CC=CS4)=O)CC)=O)CC4=CC(C=CC=C5)=C5C=C4)=O	4.36	9.14.E-07	-6.04
CHP37L	CHP37L_sub6_5	L-Pro	L-Tyr	L-Nal	D-Nva	L-Ala	D-Leu	740.902	740.3897	763.3795	763.5202	O=C([C@@H]1CCCN1C([C@H]2CC(C)C)=O)N[C@@H](CC(C=C3)=CC=C3O)C(N[C@H](C(N[C@@H](C(N[C@H](C(N2)=O)C)=O)CCC)=O)CC4=CC(C=CC=C5)=C5C=C4)=O	3.33	1.19.E-06	-5.93
CHP37L	CHP37L_sub6_6	L-Pro	L-Tyr	L-Nal	D-Nva	L-Leu	D-Leu	782.983	782.4366	805.4264	805.5939	O=C([C@@H]1CCCN1C([C@H]2CC(C)C)=O)N[C@@H](CC(C=C3)=CC=C3O)C(N[C@H](C(N[C@@H](C(N[C@H](C(N2)=O)CC(C)C)=O)CCC)=O)CC4=CC(C=CC=C5)=C5C=C4)=O	4.08	4.95.E-07	-6.31
CHP37L	CHP37L_sub6_7	L-Pro	L-Tyr	L-Nal	D-Nva	L-Nal	D-Leu	867.06	866.4366	889.4264	889.6933	O=C([C@@H]1CCCN1C([C@H]2CC(C)C)=O)N[C@@H](CC(C=C3)=CC=C3O)C(N[C@H](C(N[C@@H](C(N[C@H](C(N2)=O)CC4=CC(C=CC=C5)=C5C=C4)=O)CCC)=O)CC4=CC(C=CC=C5)=C5C=C4)=O	5.61	2.86.E-08	-7.54
CHP37L	CHP37L_sub6_8	L-Pro	L-Tyr	L-Nal	D-Nva	L-Thi	D-Leu	823.022	822.3774	845.3672	845.5751	O=C([C@@H]1CCCN1C([C@H]2CC(C)C)=O)N[C@@H](CC(C=C3)=CC=C3O)C(N[C@H](C(N[C@@H](C(N[C@H](C(N2)=O)CC4=CC=CS4)=O)CCC)=O)CC4=CC(C=CC=C5)=C5C=C4)=O	4.54	2.87.E-07	-6.54
CHP37L	CHP37L_sub6_9	L-Pro	L-Tyr	L-Nal	D-Phe	L-Ala	D-Leu	788.946	788.3897	811.3795	811.5521	O=C([C@@H]1CCCN1C([C@H]2CC(C)C)=O)N[C@@H](CC(C=C3)=CC=C3O)C(N[C@H](C(N[C@@H](C(N[C@H](C(N2)=O)C)=O)CC4=CC=CC=C4)=O)CC4=CC(C=CC=C5)=C5C=C4)=O	4.11	1.78.E-06	-5.75
CHP37L	CHP37L_sub6_10	L-Pro	L-Tyr	L-Nal	D-Phe	L-Leu	D-Leu	831.027	830.4366	853.4264	853.6473	O=C([C@@H]1CCCN1C([C@H]2CC(C)C)=O)N[C@@H](CC(C=C3)=CC=C3O)C(N[C@H](C(N[C@@H](C(N[C@H](C(N2)=O)CC(C)C)=O)CC4=CC=CC=C4)=O)CC4=CC(C=CC=C5)=C5C=C4)=O	4.71	1.32.E-07	-6.88
CHP37L	CHP37L_sub6_11	L-Pro	L-Tyr	L-Nal	D-Phe	L-Nal	D-Leu	915.104	914.4366	937.4264	937.7204	O=C([C@@H]1CCCN1C([C@H]2CC(C)C)=O)N[C@@H](CC(C=C3)=CC=C3O)C(N[C@H](C(N[C@@H](C(N[C@H](C(N2)=O)CC4=CC(C=CC=C5)=C5C=C4)=O)CC6=CC=CC=C6)=O)CC4=CC(C=CC=C5)=C5C=C4)=O	6.09	1.21.E-08	-7.92
CHP37L	CHP37L_sub6_12	L-Pro	L-Tyr	L-Nal	D-Phe	L-Thi	D-Leu	871.066	870.3774	893.3672	893.6294	O=C([C@@H]1CCCN1C([C@H]2CC(C)C)=O)N[C@@H](CC(C=C3)=CC=C3O)C(N[C@H](C(N[C@@H](C(N[C@H](C(N2)=O)CC4=CC=CS4)=O)CC5=CC=CC=C5)=O)CC4=CC(C=CC=C5)=C5C=C4)=O	5.08	8.27.E-08	-7.08
CHP37L	CHP37L_sub6_13	L-Pro	L-Tyr	L-Nal	D-Phe(4F)	L-Ala	D-Leu	806.9364	806.3803	829.3701	829.5488	O=C([C@@H]1CCCN1C([C@H]2CC(C)C)=O)N[C@@H](CC(C=C3)=CC=C3O)C(N[C@H](C(N[C@@H](C(N[C@H](C(N2)=O)C)=O)CC4=CC=C(F)C=C4)=O)CC4=CC(C=CC=C5)=C5C=C4)=O	3.99	1.41.E-06	-5.85
CHP37L	CHP37L_sub6_14	L-Pro	L-Tyr	L-Nal	D-Phe(4F)	L-Leu	D-Leu	849.0174	848.4272	871.417	871.6381	O=C([C@@H]1CCCN1C([C@H]2CC(C)C)=O)N[C@@H](CC(C=C3)=CC=C3O)C(N[C@H](C(N[C@@H](C(N[C@H](C(N2)=O)CC(C)C)=O)CC4=CC=C(F)C=C4)=O)CC4=CC(C=CC=C5)=C5C=C4)=O	4.68	7.44.E-08	-7.13
CHP37L	CHP37L_sub6_15	L-Pro	L-Tyr	L-Nal	D-Phe(4F)	L-Nal	D-Leu	933.0944	932.4272	955.417	955.7135	O=C([C@@H]1CCCN1C([C@H]2CC(C)C)=O)N[C@@H](CC(C=C3)=CC=C3O)C(N[C@H](C(N[C@@H](C(N[C@H](C(N2)=O)CC4=CC(C=CC=C5)=C5C=C4)=O)CC6=CC=C(F)C=C6)=O)CC4=CC(C=CC=C5)=C5C=C4)=O	5.99	1.26.E-08	-7.9
CHP37L	CHP37L_sub6_16	L-Pro	L-Tyr	L-Nal	D-Phe(4F)	L-Thi	D-Leu	889.0564	888.368	911.3578	911.6228	O=C([C@@H]1CCCN1C([C@H]2CC(C)C)=O)N[C@@H](CC(C=C3)=CC=C3O)C(N[C@H](C(N[C@@H](C(N[C@H](C(N2)=O)CC4=CC=CS4)=O)CC5=CC=C(F)C=C5)=O)CC4=CC(C=CC=C5)=C5C=C4)=O	5.11	4.21.E-08	-7.38
CHP37L	CHP37L_sub7_1	L-Pro	L-Tyr	L-Phe(4F)	D-Abu	L-Ala	D-Leu	694.8054	694.349	717.3388	717.52	O=C([C@@H]1CCCN1C([C@H]2CC(C)C)=O)N[C@@H](CC(C=C3)=CC=C3O)C(N[C@H](C(N[C@@H](C(N[C@H](C(N2)=O)C)=O)CC)=O)CC4=CC=C(F)C=C4)=O	2.1	2.11.E-07	-6.68
CHP37L	CHP37L_sub7_2	L-Pro	L-Tyr	L-Phe(4F)	D-Abu	L-Leu	D-Leu	736.8864	736.3959	759.3857	759.5785	O=C([C@@H]1CCCN1C([C@H]2CC(C)C)=O)N[C@@H](CC(C=C3)=CC=C3O)C(N[C@H](C(N[C@@H](C(N[C@H](C(N2)=O)CC(C)C)=O)CC)=O)CC4=CC=C(F)C=C4)=O	2.66	2.89.E-06	-5.54
CHP37L	CHP37L_sub7_3	L-Pro	L-Tyr	L-Phe(4F)	D-Abu	L-Nal	D-Leu	820.9634	820.3959	843.3857	843.6191	O=C([C@@H]1CCCN1C([C@H]2CC(C)C)=O)N[C@@H](CC(C=C3)=CC=C3O)C(N[C@H](C(N[C@@H](C(N[C@H](C(N2)=O)CC4=CC(C=CC=C5)=C5C=C4)=O)CC)=O)CC4=CC=C(F)C=C4)=O	4.37	1.62.E-06	-5.79
CHP37L	CHP37L_sub7_4	L-Pro	L-Tyr	L-Phe(4F)	D-Abu	L-Thi	D-Leu	776.9254	776.3367	799.3265	799.5539	O=C([C@@H]1CCCN1C([C@H]2CC(C)C)=O)N[C@@H](CC(C=C3)=CC=C3O)C(N[C@H](C(N[C@@H](C(N[C@H](C(N2)=O)CC4=CC=CS4)=O)CC)=O)CC4=CC=C(F)C=C4)=O	3.56	2.28.E-06	-5.64
CHP37L	CHP37L_sub7_5	L-Pro	L-Tyr	L-Phe(4F)	D-Nva	L-Ala	D-Leu	708.8324	708.3647	731.3545	731.5401	O=C([C@@H]1CCCN1C([C@H]2CC(C)C)=O)N[C@@H](CC(C=C3)=CC=C3O)C(N[C@H](C(N[C@@H](C(N[C@H](C(N2)=O)C)=O)CCC)=O)CC4=CC=C(F)C=C4)=O	2.26	4.36.E-07	-6.36
CHP37L	CHP37L_sub7_6	L-Pro	L-Tyr	L-Phe(4F)	D-Nva	L-Leu	D-Leu	750.9134	750.4116	773.4014	773.5998	O=C([C@@H]1CCCN1C([C@H]2CC(C)C)=O)N[C@@H](CC(C=C3)=CC=C3O)C(N[C@H](C(N[C@@H](C(N[C@H](C(N2)=O)CC(C)C)=O)CCC)=O)CC4=CC=C(F)C=C4)=O	3.11	3.34.E-06	-5.48
CHP37L	CHP37L_sub7_7	L-Pro	L-Tyr	L-Phe(4F)	D-Nva	L-Nal	D-Leu	834.9904	834.4116	857.4014	857.6358	O=C([C@@H]1CCCN1C([C@H]2CC(C)C)=O)N[C@@H](CC(C=C3)=CC=C3O)C(N[C@H](C(N[C@@H](C(N[C@H](C(N2)=O)CC4=CC(C=CC=C5)=C5C=C4)=O)CCC)=O)CC4=CC=C(F)C=C4)=O	4.65	9.38.E-07	-6.03
CHP37L	CHP37L_sub7_8	L-Pro	L-Tyr	L-Phe(4F)	D-Nva	L-Thi	D-Leu	790.9524	790.3524	813.3422	813.553	O=C([C@@H]1CCCN1C([C@H]2CC(C)C)=O)N[C@@H](CC(C=C3)=CC=C3O)C(N[C@H](C(N[C@@H](C(N[C@H](C(N2)=O)CC4=CC=CS4)=O)CCC)=O)CC4=CC=C(F)C=C4)=O	3.74	2.73.E-06	-5.56
CHP37L	CHP37L_sub7_9	L-Pro	L-Tyr	L-Phe(4F)	D-Phe	L-Ala	D-Leu	756.8764	756.3647	779.3545	779.5606	O=C([C@@H]1CCCN1C([C@H]2CC(C)C)=O)N[C@@H](CC(C=C3)=CC=C3O)C(N[C@H](C(N[C@@H](C(N[C@H](C(N2)=O)C)=O)CC4=CC=CC=C4)=O)CC4=CC=C(F)C=C4)=O	2.99	2.92.E-06	-5.53
CHP37L	CHP37L_sub7_10	L-Pro	L-Tyr	L-Phe(4F)	D-Phe	L-Leu	D-Leu	798.9574	798.4116	821.4014	821.6266	O=C([C@@H]1CCCN1C([C@H]2CC(C)C)=O)N[C@@H](CC(C=C3)=CC=C3O)C(N[C@H](C(N[C@@H](C(N[C@H](C(N2)=O)CC(C)C)=O)CC4=CC=CC=C4)=O)CC4=CC=C(F)C=C4)=O	3.62	2.48.E-06	-5.61
CHP37L	CHP37L_sub7_11	L-Pro	L-Tyr	L-Phe(4F)	D-Phe	L-Nal	D-Leu	883.0344	882.4116	905.4014	905.6591	O=C([C@@H]1CCCN1C([C@H]2CC(C)C)=O)N[C@@H](CC(C=C3)=CC=C3O)C(N[C@H](C(N[C@@H](C(N[C@H](C(N2)=O)CC4=CC(C=CC=C5)=C5C=C4)=O)CC6=CC=CC=C6)=O)CC4=CC=C(F)C=C4)=O	5.2	1.28.E-07	-6.89
CHP37L	CHP37L_sub7_12	L-Pro	L-Tyr	L-Phe(4F)	D-Phe	L-Thi	D-Leu	838.9964	838.3524	861.3422	861.5849	O=C([C@@H]1CCCN1C([C@H]2CC(C)C)=O)N[C@@H](CC(C=C3)=CC=C3O)C(N[C@H](C(N[C@@H](C(N[C@H](C(N2)=O)CC4=CC=CS4)=O)CC5=CC=CC=C5)=O)CC4=CC=C(F)C=C4)=O	4.34	1.44.E-06	-5.84
CHP37L	CHP37L_sub7_13	L-Pro	L-Tyr	L-Phe(4F)	D-Phe(4F)	L-Ala	D-Leu	774.8668	774.3553	797.3451	797.5534	O=C([C@@H]1CCCN1C([C@H]2CC(C)C)=O)N[C@@H](CC(C=C3)=CC=C3O)C(N[C@H](C(N[C@@H](C(N[C@H](C(N2)=O)C)=O)CC4=CC=C(F)C=C4)=O)CC4=CC=C(F)C=C4)=O	3.09	3.19.E-06	-5.5
CHP37L	CHP37L_sub7_14	L-Pro	L-Tyr	L-Phe(4F)	D-Phe(4F)	L-Leu	D-Leu	816.9478	816.4022	839.392	839.6076	O=C([C@@H]1CCCN1C([C@H]2CC(C)C)=O)N[C@@H](CC(C=C3)=CC=C3O)C(N[C@H](C(N[C@@H](C(N[C@H](C(N2)=O)CC(C)C)=O)CC4=CC=C(F)C=C4)=O)CC4=CC=C(F)C=C4)=O	3.52	2.43.E-06	-5.62
CHP37L	CHP37L_sub7_15	L-Pro	L-Tyr	L-Phe(4F)	D-Phe(4F)	L-Nal	D-Leu	901.0248	900.4022	923.392	923.6547	O=C([C@@H]1CCCN1C([C@H]2CC(C)C)=O)N[C@@H](CC(C=C3)=CC=C3O)C(N[C@H](C(N[C@@H](C(N[C@H](C(N2)=O)CC4=CC(C=CC=C5)=C5C=C4)=O)CC6=CC=C(F)C=C6)=O)CC4=CC=C(F)C=C4)=O	5.11	1.23.E-07	-6.91
CHP37L	CHP37L_sub7_16	L-Pro	L-Tyr	L-Phe(4F)	D-Phe(4F)	L-Thi	D-Leu	856.9868	856.343	879.3328	879.5822	O=C([C@@H]1CCCN1C([C@H]2CC(C)C)=O)N[C@@H](CC(C=C3)=CC=C3O)C(N[C@H](C(N[C@@H](C(N[C@H](C(N2)=O)CC4=CC=CS4)=O)CC5=CC=C(F)C=C5)=O)CC4=CC=C(F)C=C4)=O	4.25	1.15.E-06	-5.94
CHP37L	CHP37L_sub8_1	L-Pro	L-Tyr	L-Thi	D-Abu	L-Ala	D-Leu	682.837	682.3148	705.3046	705.4763	O=C([C@@H]1CCCN1C([C@H]2CC(C)C)=O)N[C@@H](CC(C=C3)=CC=C3O)C(N[C@H](C(N[C@@H](C(N[C@H](C(N2)=O)C)=O)CC)=O)CC4=CC=CS4)=O	1.92	1.07.E-07	-6.97
CHP37L	CHP37L_sub8_2	L-Pro	L-Tyr	L-Thi	D-Abu	L-Leu	D-Leu	724.918	724.3617	747.3515	747.5353	O=C([C@@H]1CCCN1C([C@H]2CC(C)C)=O)N[C@@H](CC(C=C3)=CC=C3O)C(N[C@H](C(N[C@@H](C(N[C@H](C(N2)=O)CC(C)C)=O)CC)=O)CC4=CC=CS4)=O	2.51	1.34.E-06	-5.87
CHP37L	CHP37L_sub8_3	L-Pro	L-Tyr	L-Thi	D-Abu	L-Nal	D-Leu	808.995	808.3617	831.3515	831.5691	O=C([C@@H]1CCCN1C([C@H]2CC(C)C)=O)N[C@@H](CC(C=C3)=CC=C3O)C(N[C@H](C(N[C@@H](C(N[C@H](C(N2)=O)CC4=CC(C=CC=C5)=C5C=C4)=O)CC)=O)CC4=CC=CS4)=O	4.37	1.54.E-06	-5.81
CHP37L	CHP37L_sub8_4	L-Pro	L-Tyr	L-Thi	D-Abu	L-Thi	D-Leu	764.957	764.3025	787.2923	787.494	O=C([C@@H]1CCCN1C([C@H]2CC(C)C)=O)N[C@@H](CC(C=C3)=CC=C3O)C(N[C@H](C(N[C@@H](C(N[C@H](C(N2)=O)CC4=CC=CS4)=O)CC)=O)CC4=CC=CS4)=O	3.04	1.11.E-06	-5.95
CHP37L	CHP37L_sub8_5	L-Pro	L-Tyr	L-Thi	D-Nva	L-Ala	D-Leu	696.864	696.3305	719.3203	719.493	O=C([C@@H]1CCCN1C([C@H]2CC(C)C)=O)N[C@@H](CC(C=C3)=CC=C3O)C(N[C@H](C(N[C@@H](C(N[C@H](C(N2)=O)C)=O)CCC)=O)CC4=CC=CS4)=O	2.27	2.04.E-07	-6.69
CHP37L	CHP37L_sub8_6	L-Pro	L-Tyr	L-Thi	D-Nva	L-Leu	D-Leu	738.945	738.3774	761.3672	761.554	O=C([C@@H]1CCCN1C([C@H]2CC(C)C)=O)N[C@@H](CC(C=C3)=CC=C3O)C(N[C@H](C(N[C@@H](C(N[C@H](C(N2)=O)CC(C)C)=O)CCC)=O)CC4=CC=CS4)=O	2.88	1.75.E-06	-5.76
CHP37L	CHP37L_sub8_7	L-Pro	L-Tyr	L-Thi	D-Nva	L-Nal	D-Leu	823.022	822.3774	845.3672	845.5869	O=C([C@@H]1CCCN1C([C@H]2CC(C)C)=O)N[C@@H](CC(C=C3)=CC=C3O)C(N[C@H](C(N[C@@H](C(N[C@H](C(N2)=O)CC4=CC(C=CC=C5)=C5C=C4)=O)CCC)=O)CC4=CC=CS4)=O	4.54	9.60.E-07	-6.02
CHP37L	CHP37L_sub8_8	L-Pro	L-Tyr	L-Thi	D-Nva	L-Thi	D-Leu	778.984	778.3182	801.308	801.51	O=C([C@@H]1CCCN1C([C@H]2CC(C)C)=O)N[C@@H](CC(C=C3)=CC=C3O)C(N[C@H](C(N[C@@H](C(N[C@H](C(N2)=O)CC4=CC=CS4)=O)CCC)=O)CC4=CC=CS4)=O	3.32	1.22.E-06	-5.91
CHP37L	CHP37L_sub8_9	L-Pro	L-Tyr	L-Thi	D-Phe	L-Ala	D-Leu	744.908	744.3305	767.3203	767.5134	O=C([C@@H]1CCCN1C([C@H]2CC(C)C)=O)N[C@@H](CC(C=C3)=CC=C3O)C(N[C@H](C(N[C@@H](C(N[C@H](C(N2)=O)C)=O)CC4=CC=CC=C4)=O)CC4=CC=CS4)=O	2.97	1.15.E-06	-5.94
CHP37L	CHP37L_sub8_10	L-Pro	L-Tyr	L-Thi	D-Phe	L-Leu	D-Leu	786.989	786.3774	809.3672	809.5739	O=C([C@@H]1CCCN1C([C@H]2CC(C)C)=O)N[C@@H](CC(C=C3)=CC=C3O)C(N[C@H](C(N[C@@H](C(N[C@H](C(N2)=O)CC(C)C)=O)CC4=CC=CC=C4)=O)CC4=CC=CS4)=O	3.31	2.58.E-06	-5.59
CHP37L	CHP37L_sub8_11	L-Pro	L-Tyr	L-Thi	D-Phe	L-Nal	D-Leu	871.066	870.3774	893.3672	893.6042	O=C([C@@H]1CCCN1C([C@H]2CC(C)C)=O)N[C@@H](CC(C=C3)=CC=C3O)C(N[C@H](C(N[C@@H](C(N[C@H](C(N2)=O)CC4=CC(C=CC=C5)=C5C=C4)=O)CC6=CC=CC=C6)=O)CC4=CC=CS4)=O	5.07	1.84.E-07	-6.74
CHP37L	CHP37L_sub8_12	L-Pro	L-Tyr	L-Thi	D-Phe	L-Thi	D-Leu	827.028	826.3182	849.308	849.5356	O=C([C@@H]1CCCN1C([C@H]2CC(C)C)=O)N[C@@H](CC(C=C3)=CC=C3O)C(N[C@H](C(N[C@@H](C(N[C@H](C(N2)=O)CC4=CC=CS4)=O)CC5=CC=CC=C5)=O)CC4=CC=CS4)=O	4.02	1.57.E-06	-5.8
CHP37L	CHP37L_sub8_13	L-Pro	L-Tyr	L-Thi	D-Phe(4F)	L-Ala	D-Leu	762.8984	762.3211	785.3109	785.5079	O=C([C@@H]1CCCN1C([C@H]2CC(C)C)=O)N[C@@H](CC(C=C3)=CC=C3O)C(N[C@H](C(N[C@@H](C(N[C@H](C(N2)=O)C)=O)CC4=CC=C(F)C=C4)=O)CC4=CC=CS4)=O	3.28	1.58.E-06	-5.8
CHP37L	CHP37L_sub8_14	L-Pro	L-Tyr	L-Thi	D-Phe(4F)	L-Leu	D-Leu	804.9794	804.368	827.3578	827.5619	O=C([C@@H]1CCCN1C([C@H]2CC(C)C)=O)N[C@@H](CC(C=C3)=CC=C3O)C(N[C@H](C(N[C@@H](C(N[C@H](C(N2)=O)CC(C)C)=O)CC4=CC=C(F)C=C4)=O)CC4=CC=CS4)=O	3.51	2.60.E-06	-5.59
CHP37L	CHP37L_sub8_15	L-Pro	L-Tyr	L-Thi	D-Phe(4F)	L-Nal	D-Leu	889.0564	888.368	911.3578	911.606	O=C([C@@H]1CCCN1C([C@H]2CC(C)C)=O)N[C@@H](CC(C=C3)=CC=C3O)C(N[C@H](C(N[C@@H](C(N[C@H](C(N2)=O)CC4=CC(C=CC=C5)=C5C=C4)=O)CC6=CC=C(F)C=C6)=O)CC4=CC=CS4)=O	5.12	1.19.E-07	-6.93
CHP37L	CHP37L_sub8_16	L-Pro	L-Tyr	L-Thi	D-Phe(4F)	L-Thi	D-Leu	845.0184	844.3088	867.2986	867.5326	O=C([C@@H]1CCCN1C([C@H]2CC(C)C)=O)N[C@@H](CC(C=C3)=CC=C3O)C(N[C@H](C(N[C@@H](C(N[C@H](C(N2)=O)CC4=CC=CS4)=O)CC5=CC=C(F)C=C5)=O)CC4=CC=CS4)=O	4.17	1.33.E-06	-5.88
CHP61L	CHP61L_sub1_1	D-Pro	D-Tyr	L-Ala	D-Abu	D-Ala	D-Leu	600.717	600.3271	623.3169	623.2435	O=C([C@H]1CCCN1C([C@H]2CC(C)C)=O)N[C@H](CC(C=C3)=CC=C3O)C(N[C@H](C(N[C@@H](C(N[C@@H](C(N2)=O)C)=O)CC)=O)C)=O	0.79			101%	-1.6
CHP61L	CHP61L_sub1_2	D-Pro	D-Tyr	L-Ala	D-Abu	D-Leu	D-Leu	642.798	642.374	665.3638	665.2952	O=C([C@H]1CCCN1C([C@H]2CC(C)C)=O)N[C@H](CC(C=C3)=CC=C3O)C(N[C@H](C(N[C@@H](C(N[C@@H](C(N2)=O)CC(C)C)=O)CC)=O)C)=O	1.61			113%	-20.4
CHP61L	CHP61L_sub1_3	D-Pro	D-Tyr	L-Ala	D-Abu	D-Nal	D-Leu	726.875	726.374	749.3638	749.317	O=C([C@H]1CCCN1C([C@H]2CC(C)C)=O)N[C@H](CC(C=C3)=CC=C3O)C(N[C@H](C(N[C@@H](C(N[C@@H](C(N2)=O)CC4=CC(C=CC=C5)=C5C=C4)=O)CC)=O)C)=O	3.05			91%	15.5
CHP61L	CHP61L_sub1_4	D-Pro	D-Tyr	L-Ala	D-Abu	D-Thi	D-Leu	682.837	682.3148	705.3046	705.2564	O=C([C@H]1CCCN1C([C@H]2CC(C)C)=O)N[C@H](CC(C=C3)=CC=C3O)C(N[C@H](C(N[C@@H](C(N[C@@H](C(N2)=O)CC4=CC=CS4)=O)CC)=O)C)=O	1.96			108%	-12.3
CHP61L	CHP61L_sub1_5	D-Pro	D-Tyr	L-Ala	D-Nva	D-Ala	D-Leu	614.744	614.3428	637.3326	637.2602	O=C([C@H]1CCCN1C([C@H]2CC(C)C)=O)N[C@H](CC(C=C3)=CC=C3O)C(N[C@H](C(N[C@@H](C(N[C@@H](C(N2)=O)C)=O)CCC)=O)C)=O	1.21			108%	-13.1
CHP61L	CHP61L_sub1_6	D-Pro	D-Tyr	L-Ala	D-Nva	D-Leu	D-Leu	656.825	656.3897	679.3795	679.3148	O=C([C@H]1CCCN1C([C@H]2CC(C)C)=O)N[C@H](CC(C=C3)=CC=C3O)C(N[C@H](C(N[C@@H](C(N[C@@H](C(N2)=O)CC(C)C)=O)CCC)=O)C)=O	1.98			111%	-16.9
CHP61L	CHP61L_sub1_7	D-Pro	D-Tyr	L-Ala	D-Nva	D-Nal	D-Leu	740.902	740.3897	763.3795	763.3302	O=C([C@H]1CCCN1C([C@H]2CC(C)C)=O)N[C@H](CC(C=C3)=CC=C3O)C(N[C@H](C(N[C@@H](C(N[C@@H](C(N2)=O)CC4=CC(C=CC=C5)=C5C=C4)=O)CCC)=O)C)=O	3.35			90%	16.7
CHP61L	CHP61L_sub1_8	D-Pro	D-Tyr	L-Ala	D-Nva	D-Thi	D-Leu	696.864	696.3305	719.3203	719.2582	O=C([C@H]1CCCN1C([C@H]2CC(C)C)=O)N[C@H](CC(C=C3)=CC=C3O)C(N[C@H](C(N[C@@H](C(N[C@@H](C(N2)=O)CC4=CC=CS4)=O)CCC)=O)C)=O	2.26			107%	-11.2
CHP61L	CHP61L_sub1_9	D-Pro	D-Tyr	L-Ala	D-Phe	D-Ala	D-Leu	662.788	662.3428	685.3326	685.2715	O=C([C@H]1CCCN1C([C@H]2CC(C)C)=O)N[C@H](CC(C=C3)=CC=C3O)C(N[C@H](C(N[C@@H](C(N[C@@H](C(N2)=O)C)=O)CC4=CC=CC=C4)=O)C)=O	1.66			105%	-8.5
CHP61L	CHP61L_sub1_10	D-Pro	D-Tyr	L-Ala	D-Phe	D-Leu	D-Leu	704.869	704.3897	727.3795	727.3289	O=C([C@H]1CCCN1C([C@H]2CC(C)C)=O)N[C@H](CC(C=C3)=CC=C3O)C(N[C@H](C(N[C@@H](C(N[C@@H](C(N2)=O)CC(C)C)=O)CC4=CC=CC=C4)=O)C)=O	2.32			97%	5.5
CHP61L	CHP61L_sub1_11	D-Pro	D-Tyr	L-Ala	D-Phe	D-Nal	D-Leu	788.946	788.3897	811.3795	811.3377	O=C([C@H]1CCCN1C([C@H]2CC(C)C)=O)N[C@H](CC(C=C3)=CC=C3O)C(N[C@H](C(N[C@@H](C(N[C@@H](C(N2)=O)CC4=CC(C=CC=C5)=C5C=C4)=O)CC6=CC=CC=C6)=O)C)=O	4.12			49%	119.5
CHP61L	CHP61L_sub1_12	D-Pro	D-Tyr	L-Ala	D-Phe	D-Thi	D-Leu	744.908	744.3305	767.3203	767.2786	O=C([C@H]1CCCN1C([C@H]2CC(C)C)=O)N[C@H](CC(C=C3)=CC=C3O)C(N[C@H](C(N[C@@H](C(N[C@@H](C(N2)=O)CC4=CC=CS4)=O)CC5=CC=CC=C5)=O)C)=O	3.03			95%	8.5
CHP61L	CHP61L_sub1_13	D-Pro	D-Tyr	L-Ala	D-Phe(4F)	D-Ala	D-Leu	680.7784	680.3334	703.3232	703.2571	O=C([C@H]1CCCN1C([C@H]2CC(C)C)=O)N[C@H](CC(C=C3)=CC=C3O)C(N[C@H](C(N[C@@H](C(N[C@@H](C(N2)=O)C)=O)CC4=CC=C(F)C=C4)=O)C)=O	1.87			105%	-8.3
CHP61L	CHP61L_sub1_14	D-Pro	D-Tyr	L-Ala	D-Phe(4F)	D-Leu	D-Leu	722.8594	722.3803	745.3701	745.3106	O=C([C@H]1CCCN1C([C@H]2CC(C)C)=O)N[C@H](CC(C=C3)=CC=C3O)C(N[C@H](C(N[C@@H](C(N[C@@H](C(N2)=O)CC(C)C)=O)CC4=CC=C(F)C=C4)=O)C)=O	2.16			99%	2.5
CHP61L	CHP61L_sub1_15	D-Pro	D-Tyr	L-Ala	D-Phe(4F)	D-Nal	D-Leu	806.9364	806.3803	829.3701	829.3333	O=C([C@H]1CCCN1C([C@H]2CC(C)C)=O)N[C@H](CC(C=C3)=CC=C3O)C(N[C@H](C(N[C@@H](C(N[C@@H](C(N2)=O)CC4=CC(C=CC=C5)=C5C=C4)=O)CC6=CC=C(F)C=C6)=O)C)=O	3.99			44%	137.7
CHP61L	CHP61L_sub1_16	D-Pro	D-Tyr	L-Ala	D-Phe(4F)	D-Thi	D-Leu	762.8984	762.3211	785.3109	785.2642	O=C([C@H]1CCCN1C([C@H]2CC(C)C)=O)N[C@H](CC(C=C3)=CC=C3O)C(N[C@H](C(N[C@@H](C(N[C@@H](C(N2)=O)CC4=CC=CS4)=O)CC5=CC=C(F)C=C5)=O)C)=O	3.31			95%	8.2
CHP61L	CHP61L_sub2_1	D-Pro	D-Tyr	L-Abu	D-Abu	D-Ala	D-Leu	614.744	614.3427	637.3325	637.267	O=C([C@H]1CCCN1C([C@H]2CC(C)C)=O)N[C@H](CC(C=C3)=CC=C3O)C(N[C@H](C(N[C@@H](C(N[C@@H](C(N2)=O)C)=O)CC)=O)CC)=O	1.09			101%	-1.2
CHP61L	CHP61L_sub2_2	D-Pro	D-Tyr	L-Abu	D-Abu	D-Leu	D-Leu	656.825	656.3896	679.3794	679.3215	O=C([C@H]1CCCN1C([C@H]2CC(C)C)=O)N[C@H](CC(C=C3)=CC=C3O)C(N[C@H](C(N[C@@H](C(N[C@@H](C(N2)=O)CC(C)C)=O)CC)=O)CC)=O	1.98			111%	-16.7
CHP61L	CHP61L_sub2_3	D-Pro	D-Tyr	L-Abu	D-Abu	D-Nal	D-Leu	740.902	740.3896	763.3794	763.3419	O=C([C@H]1CCCN1C([C@H]2CC(C)C)=O)N[C@H](CC(C=C3)=CC=C3O)C(N[C@H](C(N[C@@H](C(N[C@@H](C(N2)=O)CC4=CC(C=CC=C5)=C5C=C4)=O)CC)=O)CC)=O	3.45			89%	18.9
CHP61L	CHP61L_sub2_4	D-Pro	D-Tyr	L-Abu	D-Abu	D-Thi	D-Leu	696.864	696.3304	719.3202	719.3181	O=C([C@H]1CCCN1C([C@H]2CC(C)C)=O)N[C@H](CC(C=C3)=CC=C3O)C(N[C@H](C(N[C@@H](C(N[C@@H](C(N2)=O)CC4=CC=CS4)=O)CC)=O)CC)=O	2.31			107%	-12
CHP61L	CHP61L_sub2_5	D-Pro	D-Tyr	L-Abu	D-Nva	D-Ala	D-Leu	628.771	628.3584	651.3482	651.2847	O=C([C@H]1CCCN1C([C@H]2CC(C)C)=O)N[C@H](CC(C=C3)=CC=C3O)C(N[C@H](C(N[C@@H](C(N[C@@H](C(N2)=O)C)=O)CCC)=O)CC)=O	1.47			105%	-8.2
CHP61L	CHP61L_sub2_6	D-Pro	D-Tyr	L-Abu	D-Nva	D-Leu	D-Leu	670.852	670.4053	693.3951	693.3156	O=C([C@H]1CCCN1C([C@H]2CC(C)C)=O)N[C@H](CC(C=C3)=CC=C3O)C(N[C@H](C(N[C@@H](C(N[C@@H](C(N2)=O)CC(C)C)=O)CCC)=O)CC)=O	2.3			105%	-8.4
CHP61L	CHP61L_sub2_7	D-Pro	D-Tyr	L-Abu	D-Nva	D-Nal	D-Leu	754.929	754.4053	777.3951	777.3522	O=C([C@H]1CCCN1C([C@H]2CC(C)C)=O)N[C@H](CC(C=C3)=CC=C3O)C(N[C@H](C(N[C@@H](C(N[C@@H](C(N2)=O)CC4=CC(C=CC=C5)=C5C=C4)=O)CCC)=O)CC)=O	3.68			94%	10.6
CHP61L	CHP61L_sub2_8	D-Pro	D-Tyr	L-Abu	D-Nva	D-Thi	D-Leu	710.891	710.3461	733.3359	733.2892	O=C([C@H]1CCCN1C([C@H]2CC(C)C)=O)N[C@H](CC(C=C3)=CC=C3O)C(N[C@H](C(N[C@@H](C(N[C@@H](C(N2)=O)CC4=CC=CS4)=O)CCC)=O)CC)=O	2.61			109%	-14.3
CHP61L	CHP61L_sub2_9	D-Pro	D-Tyr	L-Abu	D-Phe	D-Ala	D-Leu	676.815	676.3584	699.3482	699.2942	O=C([C@H]1CCCN1C([C@H]2CC(C)C)=O)N[C@H](CC(C=C3)=CC=C3O)C(N[C@H](C(N[C@@H](C(N[C@@H](C(N2)=O)C)=O)CC4=CC=CC=C4)=O)CC)=O	1.97			108%	-12.6
CHP61L	CHP61L_sub2_10	D-Pro	D-Tyr	L-Abu	D-Phe	D-Leu	D-Leu	718.896	718.4053	741.3951	741.3488	O=C([C@H]1CCCN1C([C@H]2CC(C)C)=O)N[C@H](CC(C=C3)=CC=C3O)C(N[C@H](C(N[C@@H](C(N[C@@H](C(N2)=O)CC(C)C)=O)CC4=CC=CC=C4)=O)CC)=O	2.83			99%	1.1
CHP61L	CHP61L_sub2_11	D-Pro	D-Tyr	L-Abu	D-Phe	D-Nal	D-Leu	802.973	802.4053	825.3951	825.3667	O=C([C@H]1CCCN1C([C@H]2CC(C)C)=O)N[C@H](CC(C=C3)=CC=C3O)C(N[C@H](C(N[C@@H](C(N[C@@H](C(N2)=O)CC4=CC(C=CC=C5)=C5C=C4)=O)CC6=CC=CC=C6)=O)CC)=O	4.42			60%	84.9
CHP61L	CHP61L_sub2_12	D-Pro	D-Tyr	L-Abu	D-Phe	D-Thi	D-Leu	758.935	758.3461	781.3359	781.307	O=C([C@H]1CCCN1C([C@H]2CC(C)C)=O)N[C@H](CC(C=C3)=CC=C3O)C(N[C@H](C(N[C@@H](C(N[C@@H](C(N2)=O)CC4=CC=CS4)=O)CC5=CC=CC=C5)=O)CC)=O	3.33			98%	3.2
CHP61L	CHP61L_sub2_13	D-Pro	D-Tyr	L-Abu	D-Phe(4F)	D-Ala	D-Leu	694.8054	694.349	717.3388	717.2856	O=C([C@H]1CCCN1C([C@H]2CC(C)C)=O)N[C@H](CC(C=C3)=CC=C3O)C(N[C@H](C(N[C@@H](C(N[C@@H](C(N2)=O)C)=O)CC4=CC=C(F)C=C4)=O)CC)=O	2.11			107%	-10.8
CHP61L	CHP61L_sub2_14	D-Pro	D-Tyr	L-Abu	D-Phe(4F)	D-Leu	D-Leu	736.8864	736.3959	759.3857	759.3296	O=C([C@H]1CCCN1C([C@H]2CC(C)C)=O)N[C@H](CC(C=C3)=CC=C3O)C(N[C@H](C(N[C@@H](C(N[C@@H](C(N2)=O)CC(C)C)=O)CC4=CC=C(F)C=C4)=O)CC)=O	2.66			102%	-3.2
CHP61L	CHP61L_sub2_15	D-Pro	D-Tyr	L-Abu	D-Phe(4F)	D-Nal	D-Leu	820.9634	820.3959	843.3857	843.3662	O=C([C@H]1CCCN1C([C@H]2CC(C)C)=O)N[C@H](CC(C=C3)=CC=C3O)C(N[C@H](C(N[C@@H](C(N[C@@H](C(N2)=O)CC4=CC(C=CC=C5)=C5C=C4)=O)CC6=CC=C(F)C=C6)=O)CC)=O	4.36			69%	61.7
CHP61L	CHP61L_sub2_16	D-Pro	D-Tyr	L-Abu	D-Phe(4F)	D-Thi	D-Leu	776.9254	776.3367	799.3265	799.2944	O=C([C@H]1CCCN1C([C@H]2CC(C)C)=O)N[C@H](CC(C=C3)=CC=C3O)C(N[C@H](C(N[C@@H](C(N[C@@H](C(N2)=O)CC4=CC=CS4)=O)CC5=CC=C(F)C=C5)=O)CC)=O	3.56			99%	2
CHP61L	CHP61L_sub3_1	D-Pro	D-Tyr	L-Nva	D-Abu	D-Ala	D-Leu	628.771	628.3584	651.3482	651.3249	O=C([C@H]1CCCN1C([C@H]2CC(C)C)=O)N[C@H](CC(C=C3)=CC=C3O)C(N[C@H](C(N[C@@H](C(N[C@@H](C(N2)=O)C)=O)CC)=O)CCC)=O	1.46			100%	0.5
CHP61L	CHP61L_sub3_2	D-Pro	D-Tyr	L-Nva	D-Abu	D-Leu	D-Leu	670.852	670.4053	693.3951	693.3754	O=C([C@H]1CCCN1C([C@H]2CC(C)C)=O)N[C@H](CC(C=C3)=CC=C3O)C(N[C@H](C(N[C@@H](C(N[C@@H](C(N2)=O)CC(C)C)=O)CC)=O)CCC)=O	2.3			109%	-14.6
CHP61L	CHP61L_sub3_3	D-Pro	D-Tyr	L-Nva	D-Abu	D-Nal	D-Leu	754.929	754.4053	777.3951	777.4123	O=C([C@H]1CCCN1C([C@H]2CC(C)C)=O)N[C@H](CC(C=C3)=CC=C3O)C(N[C@H](C(N[C@@H](C(N[C@@H](C(N2)=O)CC4=CC(C=CC=C5)=C5C=C4)=O)CC)=O)CCC)=O	3.68			91%	16.2
CHP61L	CHP61L_sub3_4	D-Pro	D-Tyr	L-Nva	D-Abu	D-Thi	D-Leu	710.891	710.3461	733.3359	733.3383	O=C([C@H]1CCCN1C([C@H]2CC(C)C)=O)N[C@H](CC(C=C3)=CC=C3O)C(N[C@H](C(N[C@@H](C(N[C@@H](C(N2)=O)CC4=CC=CS4)=O)CC)=O)CCC)=O	2.61			107%	-11.1
CHP61L	CHP61L_sub3_5	D-Pro	D-Tyr	L-Nva	D-Nva	D-Ala	D-Leu	642.798	642.3741	665.3639	665.346	O=C([C@H]1CCCN1C([C@H]2CC(C)C)=O)N[C@H](CC(C=C3)=CC=C3O)C(N[C@H](C(N[C@@H](C(N[C@@H](C(N2)=O)C)=O)CCC)=O)CCC)=O	1.86			105%	-8.8
CHP61L	CHP61L_sub3_6	D-Pro	D-Tyr	L-Nva	D-Nva	D-Leu	D-Leu	684.879	684.421	707.4108	707.4003	O=C([C@H]1CCCN1C([C@H]2CC(C)C)=O)N[C@H](CC(C=C3)=CC=C3O)C(N[C@H](C(N[C@@H](C(N[C@@H](C(N2)=O)CC(C)C)=O)CCC)=O)CCC)=O	2.57			110%	-15.2
CHP61L	CHP61L_sub3_7	D-Pro	D-Tyr	L-Nva	D-Nva	D-Nal	D-Leu	768.956	768.421	791.4108	791.4356	O=C([C@H]1CCCN1C([C@H]2CC(C)C)=O)N[C@H](CC(C=C3)=CC=C3O)C(N[C@H](C(N[C@@H](C(N[C@@H](C(N2)=O)CC4=CC(C=CC=C5)=C5C=C4)=O)CCC)=O)CCC)=O	3.97			91%	15.6
CHP61L	CHP61L_sub3_8	D-Pro	D-Tyr	L-Nva	D-Nva	D-Thi	D-Leu	724.918	724.3618	747.3516	747.3588	O=C([C@H]1CCCN1C([C@H]2CC(C)C)=O)N[C@H](CC(C=C3)=CC=C3O)C(N[C@H](C(N[C@@H](C(N[C@@H](C(N2)=O)CC4=CC=CS4)=O)CCC)=O)CCC)=O	2.91			107%	-11.8
CHP61L	CHP61L_sub3_9	D-Pro	D-Tyr	L-Nva	D-Phe	D-Ala	D-Leu	690.842	690.3741	713.3639	713.3605	O=C([C@H]1CCCN1C([C@H]2CC(C)C)=O)N[C@H](CC(C=C3)=CC=C3O)C(N[C@H](C(N[C@@H](C(N[C@@H](C(N2)=O)C)=O)CC4=CC=CC=C4)=O)CCC)=O	2.36			109%	-14.5
CHP61L	CHP61L_sub3_10	D-Pro	D-Tyr	L-Nva	D-Phe	D-Leu	D-Leu	732.923	732.421	755.4108	755.4196	O=C([C@H]1CCCN1C([C@H]2CC(C)C)=O)N[C@H](CC(C=C3)=CC=C3O)C(N[C@H](C(N[C@@H](C(N[C@@H](C(N2)=O)CC(C)C)=O)CC4=CC=CC=C4)=O)CCC)=O	3.14			101%	-1.9
CHP61L	CHP61L_sub3_11	D-Pro	D-Tyr	L-Nva	D-Phe	D-Nal	D-Leu	817	816.421	839.4108	839.4467	O=C([C@H]1CCCN1C([C@H]2CC(C)C)=O)N[C@H](CC(C=C3)=CC=C3O)C(N[C@H](C(N[C@@H](C(N[C@@H](C(N2)=O)CC4=CC(C=CC=C5)=C5C=C4)=O)CC6=CC=CC=C6)=O)CCC)=O	4.68			60%	85.6
CHP61L	CHP61L_sub3_12	D-Pro	D-Tyr	L-Nva	D-Phe	D-Thi	D-Leu	772.962	772.3618	795.3516	795.3836	O=C([C@H]1CCCN1C([C@H]2CC(C)C)=O)N[C@H](CC(C=C3)=CC=C3O)C(N[C@H](C(N[C@@H](C(N[C@@H](C(N2)=O)CC4=CC=CS4)=O)CC5=CC=CC=C5)=O)CCC)=O	3.49			94%	9.7
CHP61L	CHP61L_sub3_13	D-Pro	D-Tyr	L-Nva	D-Phe(4F)	D-Ala	D-Leu	708.8324	708.3647	731.3545	731.3521	O=C([C@H]1CCCN1C([C@H]2CC(C)C)=O)N[C@H](CC(C=C3)=CC=C3O)C(N[C@H](C(N[C@@H](C(N[C@@H](C(N2)=O)C)=O)CC4=CC=C(F)C=C4)=O)CCC)=O	2.26			105%	-7.9
CHP61L	CHP61L_sub3_14	D-Pro	D-Tyr	L-Nva	D-Phe(4F)	D-Leu	D-Leu	750.9134	750.4116	773.4014	773.415	O=C([C@H]1CCCN1C([C@H]2CC(C)C)=O)N[C@H](CC(C=C3)=CC=C3O)C(N[C@H](C(N[C@@H](C(N[C@@H](C(N2)=O)CC(C)C)=O)CC4=CC=C(F)C=C4)=O)CCC)=O	3.09			99%	2.1
CHP61L	CHP61L_sub3_15	D-Pro	D-Tyr	L-Nva	D-Phe(4F)	D-Nal	D-Leu	834.9904	834.4116	857.4014	857.4417	O=C([C@H]1CCCN1C([C@H]2CC(C)C)=O)N[C@H](CC(C=C3)=CC=C3O)C(N[C@H](C(N[C@@H](C(N[C@@H](C(N2)=O)CC4=CC(C=CC=C5)=C5C=C4)=O)CC6=CC=C(F)C=C6)=O)CCC)=O	4.63			58%	90.8
CHP61L	CHP61L_sub3_16	D-Pro	D-Tyr	L-Nva	D-Phe(4F)	D-Thi	D-Leu	790.9524	790.3524	813.3422	813.369	O=C([C@H]1CCCN1C([C@H]2CC(C)C)=O)N[C@H](CC(C=C3)=CC=C3O)C(N[C@H](C(N[C@@H](C(N[C@@H](C(N2)=O)CC4=CC=CS4)=O)CC5=CC=C(F)C=C5)=O)CCC)=O	3.73			91%	16.3
CHP61L	CHP61L_sub4_1	D-Pro	D-Tyr	L-Leu	D-Abu	D-Ala	D-Leu	642.798	642.374	665.3638	665.3715	O=C([C@H]1CCCN1C([C@H]2CC(C)C)=O)N[C@H](CC(C=C3)=CC=C3O)C(N[C@H](C(N[C@@H](C(N[C@@H](C(N2)=O)C)=O)CC)=O)CC(C)C)=O	1.59			106%	-9.9
CHP61L	CHP61L_sub4_2	D-Pro	D-Tyr	L-Leu	D-Abu	D-Leu	D-Leu	684.879	684.4209	707.4107	707.4371	O=C([C@H]1CCCN1C([C@H]2CC(C)C)=O)N[C@H](CC(C=C3)=CC=C3O)C(N[C@H](C(N[C@@H](C(N[C@@H](C(N2)=O)CC(C)C)=O)CC)=O)CC(C)C)=O	2.49			112%	-18.4
CHP61L	CHP61L_sub4_3	D-Pro	D-Tyr	L-Leu	D-Abu	D-Nal	D-Leu	768.956	768.4209	791.4107	791.4643	O=C([C@H]1CCCN1C([C@H]2CC(C)C)=O)N[C@H](CC(C=C3)=CC=C3O)C(N[C@H](C(N[C@@H](C(N[C@@H](C(N2)=O)CC4=CC(C=CC=C5)=C5C=C4)=O)CC)=O)CC(C)C)=O	3.87			98%	4.1
CHP61L	CHP61L_sub4_4	D-Pro	D-Tyr	L-Leu	D-Abu	D-Thi	D-Leu	724.918	724.3617	747.3515	747.3922	O=C([C@H]1CCCN1C([C@H]2CC(C)C)=O)N[C@H](CC(C=C3)=CC=C3O)C(N[C@H](C(N[C@@H](C(N[C@@H](C(N2)=O)CC4=CC=CS4)=O)CC)=O)CC(C)C)=O	2.5			105%	-8.6
CHP61L	CHP61L_sub4_5	D-Pro	D-Tyr	L-Leu	D-Nva	D-Ala	D-Leu	656.825	656.3897	679.3795	679.3944	O=C([C@H]1CCCN1C([C@H]2CC(C)C)=O)N[C@H](CC(C=C3)=CC=C3O)C(N[C@H](C(N[C@@H](C(N[C@@H](C(N2)=O)C)=O)CCC)=O)CC(C)C)=O	1.98			108%	-12.9
CHP61L	CHP61L_sub4_6	D-Pro	D-Tyr	L-Leu	D-Nva	D-Leu	D-Leu	698.906	698.4366	721.4264	721.4506	O=C([C@H]1CCCN1C([C@H]2CC(C)C)=O)N[C@H](CC(C=C3)=CC=C3O)C(N[C@H](C(N[C@@H](C(N[C@@H](C(N2)=O)CC(C)C)=O)CCC)=O)CC(C)C)=O	2.72			109%	-14.5
CHP61L	CHP61L_sub4_7	D-Pro	D-Tyr	L-Leu	D-Nva	D-Nal	D-Leu	782.983	782.4366	805.4264	805.4872	O=C([C@H]1CCCN1C([C@H]2CC(C)C)=O)N[C@H](CC(C=C3)=CC=C3O)C(N[C@H](C(N[C@@H](C(N[C@@H](C(N2)=O)CC4=CC(C=CC=C5)=C5C=C4)=O)CCC)=O)CC(C)C)=O	4.09			98%	3.2
CHP61L	CHP61L_sub4_8	D-Pro	D-Tyr	L-Leu	D-Nva	D-Thi	D-Leu	738.945	738.3774	761.3672	761.4151	O=C([C@H]1CCCN1C([C@H]2CC(C)C)=O)N[C@H](CC(C=C3)=CC=C3O)C(N[C@H](C(N[C@@H](C(N[C@@H](C(N2)=O)CC4=CC=CS4)=O)CCC)=O)CC(C)C)=O	2.87			111%	-17.6
CHP61L	CHP61L_sub4_9	D-Pro	D-Tyr	L-Leu	D-Phe	D-Ala	D-Leu	704.869	704.3897	727.3795	727.4104	O=C([C@H]1CCCN1C([C@H]2CC(C)C)=O)N[C@H](CC(C=C3)=CC=C3O)C(N[C@H](C(N[C@@H](C(N[C@@H](C(N2)=O)C)=O)CC4=CC=CC=C4)=O)CC(C)C)=O	2.32			111%	-17.8
CHP61L	CHP61L_sub4_10	D-Pro	D-Tyr	L-Leu	D-Phe	D-Leu	D-Leu	746.95	746.4366	769.4264	769.4717	O=C([C@H]1CCCN1C([C@H]2CC(C)C)=O)N[C@H](CC(C=C3)=CC=C3O)C(N[C@H](C(N[C@@H](C(N[C@@H](C(N2)=O)CC(C)C)=O)CC4=CC=CC=C4)=O)CC(C)C)=O	3.05			106%	-10.3
CHP61L	CHP61L_sub4_11	D-Pro	D-Tyr	L-Leu	D-Phe	D-Nal	D-Leu	831.027	830.4366	853.4264	853.5075	O=C([C@H]1CCCN1C([C@H]2CC(C)C)=O)N[C@H](CC(C=C3)=CC=C3O)C(N[C@H](C(N[C@@H](C(N[C@@H](C(N2)=O)CC4=CC(C=CC=C5)=C5C=C4)=O)CC6=CC=CC=C6)=O)CC(C)C)=O	4.71			68%	64.5
CHP61L	CHP61L_sub4_12	D-Pro	D-Tyr	L-Leu	D-Phe	D-Thi	D-Leu	786.989	786.3774	809.3672	809.436	O=C([C@H]1CCCN1C([C@H]2CC(C)C)=O)N[C@H](CC(C=C3)=CC=C3O)C(N[C@H](C(N[C@@H](C(N[C@@H](C(N2)=O)CC4=CC=CS4)=O)CC5=CC=CC=C5)=O)CC(C)C)=O	3.31			100%	0.7
CHP61L	CHP61L_sub4_13	D-Pro	D-Tyr	L-Leu	D-Phe(4F)	D-Ala	D-Leu	722.8594	722.3803	745.3701	745.4049	O=C([C@H]1CCCN1C([C@H]2CC(C)C)=O)N[C@H](CC(C=C3)=CC=C3O)C(N[C@H](C(N[C@@H](C(N[C@@H](C(N2)=O)C)=O)CC4=CC=C(F)C=C4)=O)CC(C)C)=O	2.16			105%	-7.9
CHP61L	CHP61L_sub4_14	D-Pro	D-Tyr	L-Leu	D-Phe(4F)	D-Leu	D-Leu	764.9404	764.4272	787.417	787.4695	O=C([C@H]1CCCN1C([C@H]2CC(C)C)=O)N[C@H](CC(C=C3)=CC=C3O)C(N[C@H](C(N[C@@H](C(N[C@@H](C(N2)=O)CC(C)C)=O)CC4=CC=C(F)C=C4)=O)CC(C)C)=O	3.06			107%	-11.6
CHP61L	CHP61L_sub4_15	D-Pro	D-Tyr	L-Leu	D-Phe(4F)	D-Nal	D-Leu	849.0174	848.4272	871.417	871.5021	O=C([C@H]1CCCN1C([C@H]2CC(C)C)=O)N[C@H](CC(C=C3)=CC=C3O)C(N[C@H](C(N[C@@H](C(N[C@@H](C(N2)=O)CC4=CC(C=CC=C5)=C5C=C4)=O)CC6=CC=C(F)C=C6)=O)CC(C)C)=O	4.65			67%	66.2
CHP61L	CHP61L_sub4_16	D-Pro	D-Tyr	L-Leu	D-Phe(4F)	D-Thi	D-Leu	804.9794	804.368	827.3578	827.4259	O=C([C@H]1CCCN1C([C@H]2CC(C)C)=O)N[C@H](CC(C=C3)=CC=C3O)C(N[C@H](C(N[C@@H](C(N[C@@H](C(N2)=O)CC4=CC=CS4)=O)CC5=CC=C(F)C=C5)=O)CC(C)C)=O	3.53			99%	2.1
CHP61L	CHP61L_sub5_1	D-Pro	D-Tyr	L-Phe	D-Abu	D-Ala	D-Leu	676.815	676.3584	699.3482	699.4354	O=C([C@H]1CCCN1C([C@H]2CC(C)C)=O)N[C@H](CC(C=C3)=CC=C3O)C(N[C@H](C(N[C@@H](C(N[C@@H](C(N2)=O)C)=O)CC)=O)CC4=CC=CC=C4)=O	1.97			105%	-8.2
CHP61L	CHP61L_sub5_2	D-Pro	D-Tyr	L-Phe	D-Abu	D-Leu	D-Leu	718.896	718.4053	741.3951	741.4949	O=C([C@H]1CCCN1C([C@H]2CC(C)C)=O)N[C@H](CC(C=C3)=CC=C3O)C(N[C@H](C(N[C@@H](C(N[C@@H](C(N2)=O)CC(C)C)=O)CC)=O)CC4=CC=CC=C4)=O	2.83			107%	-11.8
CHP61L	CHP61L_sub5_3	D-Pro	D-Tyr	L-Phe	D-Abu	D-Nal	D-Leu	802.973	802.4053	825.3951	825.5579	O=C([C@H]1CCCN1C([C@H]2CC(C)C)=O)N[C@H](CC(C=C3)=CC=C3O)C(N[C@H](C(N[C@@H](C(N[C@@H](C(N2)=O)CC4=CC(C=CC=C5)=C5C=C4)=O)CC)=O)CC4=CC=CC=C4)=O	4.42			43%	141.3
CHP61L	CHP61L_sub5_4	D-Pro	D-Tyr	L-Phe	D-Abu	D-Thi	D-Leu	758.935	758.3461	781.3359	781.4693	O=C([C@H]1CCCN1C([C@H]2CC(C)C)=O)N[C@H](CC(C=C3)=CC=C3O)C(N[C@H](C(N[C@@H](C(N[C@@H](C(N2)=O)CC4=CC=CS4)=O)CC)=O)CC4=CC=CC=C4)=O	3.32			102%	-2.9
CHP61L	CHP61L_sub5_5	D-Pro	D-Tyr	L-Phe	D-Nva	D-Ala	D-Leu	690.842	690.3741	713.3639	713.4601	O=C([C@H]1CCCN1C([C@H]2CC(C)C)=O)N[C@H](CC(C=C3)=CC=C3O)C(N[C@H](C(N[C@@H](C(N[C@@H](C(N2)=O)C)=O)CCC)=O)CC4=CC=CC=C4)=O	2.36			106%	-9.3
CHP61L	CHP61L_sub5_6	D-Pro	D-Tyr	L-Phe	D-Nva	D-Leu	D-Leu	732.923	732.421	755.4108	755.5246	O=C([C@H]1CCCN1C([C@H]2CC(C)C)=O)N[C@H](CC(C=C3)=CC=C3O)C(N[C@H](C(N[C@@H](C(N[C@@H](C(N2)=O)CC(C)C)=O)CCC)=O)CC4=CC=CC=C4)=O	3.13			99%	1
CHP61L	CHP61L_sub5_7	D-Pro	D-Tyr	L-Phe	D-Nva	D-Nal	D-Leu	817	816.421	839.4108	839.5923	O=C([C@H]1CCCN1C([C@H]2CC(C)C)=O)N[C@H](CC(C=C3)=CC=C3O)C(N[C@H](C(N[C@@H](C(N[C@@H](C(N2)=O)CC4=CC(C=CC=C5)=C5C=C4)=O)CCC)=O)CC4=CC=CC=C4)=O	4.67			73%	51.5
CHP61L	CHP61L_sub5_8	D-Pro	D-Tyr	L-Phe	D-Nva	D-Thi	D-Leu	772.962	772.3618	795.3516	795.4891	O=C([C@H]1CCCN1C([C@H]2CC(C)C)=O)N[C@H](CC(C=C3)=CC=C3O)C(N[C@H](C(N[C@@H](C(N[C@@H](C(N2)=O)CC4=CC=CS4)=O)CCC)=O)CC4=CC=CC=C4)=O	3.49			98%	3.2
CHP61L	CHP61L_sub5_9	D-Pro	D-Tyr	L-Phe	D-Phe	D-Ala	D-Leu	738.886	738.3741	761.3639	761.4835	O=C([C@H]1CCCN1C([C@H]2CC(C)C)=O)N[C@H](CC(C=C3)=CC=C3O)C(N[C@H](C(N[C@@H](C(N[C@@H](C(N2)=O)C)=O)CC4=CC=CC=C4)=O)CC4=CC=CC=C4)=O	2.92			101%	-2.3
CHP61L	CHP61L_sub5_10	D-Pro	D-Tyr	L-Phe	D-Phe	D-Leu	D-Leu	780.967	780.421	803.4108	803.5586	O=C([C@H]1CCCN1C([C@H]2CC(C)C)=O)N[C@H](CC(C=C3)=CC=C3O)C(N[C@H](C(N[C@@H](C(N[C@@H](C(N2)=O)CC(C)C)=O)CC4=CC=CC=C4)=O)CC4=CC=CC=C4)=O	3.66			93%	12.1
CHP61L	CHP61L_sub5_11	D-Pro	D-Tyr	L-Phe	D-Phe	D-Nal	D-Leu	865.044	864.421	887.4108	887.6205	O=C([C@H]1CCCN1C([C@H]2CC(C)C)=O)N[C@H](CC(C=C3)=CC=C3O)C(N[C@H](C(N[C@@H](C(N[C@@H](C(N2)=O)CC4=CC(C=CC=C5)=C5C=C4)=O)CC6=CC=CC=C6)=O)CC4=CC=CC=C4)=O	5.27			87%	23.8
CHP61L	CHP61L_sub5_12	D-Pro	D-Tyr	L-Phe	D-Phe	D-Thi	D-Leu	821.006	820.3618	843.3516	843.541	O=C([C@H]1CCCN1C([C@H]2CC(C)C)=O)N[C@H](CC(C=C3)=CC=C3O)C(N[C@H](C(N[C@@H](C(N[C@@H](C(N2)=O)CC4=CC=CS4)=O)CC5=CC=CC=C5)=O)CC4=CC=CC=C4)=O	4.21			58%	90.6
CHP61L	CHP61L_sub5_13	D-Pro	D-Tyr	L-Phe	D-Phe(4F)	D-Ala	D-Leu	756.8764	756.3647	779.3545	779.4824	O=C([C@H]1CCCN1C([C@H]2CC(C)C)=O)N[C@H](CC(C=C3)=CC=C3O)C(N[C@H](C(N[C@@H](C(N[C@@H](C(N2)=O)C)=O)CC4=CC=C(F)C=C4)=O)CC4=CC=CC=C4)=O	2.99			98%	3.6
CHP61L	CHP61L_sub5_14	D-Pro	D-Tyr	L-Phe	D-Phe(4F)	D-Leu	D-Leu	798.9574	798.4116	821.4014	821.5564	O=C([C@H]1CCCN1C([C@H]2CC(C)C)=O)N[C@H](CC(C=C3)=CC=C3O)C(N[C@H](C(N[C@@H](C(N[C@@H](C(N2)=O)CC(C)C)=O)CC4=CC=C(F)C=C4)=O)CC4=CC=CC=C4)=O	3.6			84%	28.3
CHP61L	CHP61L_sub5_15	D-Pro	D-Tyr	L-Phe	D-Phe(4F)	D-Nal	D-Leu	883.0344	882.4116	905.4014	905.615	O=C([C@H]1CCCN1C([C@H]2CC(C)C)=O)N[C@H](CC(C=C3)=CC=C3O)C(N[C@H](C(N[C@@H](C(N[C@@H](C(N2)=O)CC4=CC(C=CC=C5)=C5C=C4)=O)CC6=CC=C(F)C=C6)=O)CC4=CC=CC=C4)=O	5.2			99%	1.1
CHP61L	CHP61L_sub5_16	D-Pro	D-Tyr	L-Phe	D-Phe(4F)	D-Thi	D-Leu	838.9964	838.3524	861.3422	861.5239	O=C([C@H]1CCCN1C([C@H]2CC(C)C)=O)N[C@H](CC(C=C3)=CC=C3O)C(N[C@H](C(N[C@@H](C(N[C@@H](C(N2)=O)CC4=CC=CS4)=O)CC5=CC=C(F)C=C5)=O)CC4=CC=CC=C4)=O	4.32			54%	104.2
CHP61L	CHP61L_sub6_1	D-Pro	D-Tyr	L-Nal	D-Abu	D-Ala	D-Leu	726.875	726.374	749.3638	749.482	O=C([C@H]1CCCN1C([C@H]2CC(C)C)=O)N[C@H](CC(C=C3)=CC=C3O)C(N[C@H](C(N[C@@H](C(N[C@@H](C(N2)=O)C)=O)CC)=O)CC4=CC(C=CC=C5)=C5C=C4)=O	3.06			95%	9
CHP61L	CHP61L_sub6_2	D-Pro	D-Tyr	L-Nal	D-Abu	D-Leu	D-Leu	768.956	768.4209	791.4107	791.5378	O=C([C@H]1CCCN1C([C@H]2CC(C)C)=O)N[C@H](CC(C=C3)=CC=C3O)C(N[C@H](C(N[C@@H](C(N[C@@H](C(N2)=O)CC(C)C)=O)CC)=O)CC4=CC(C=CC=C5)=C5C=C4)=O	3.86			75%	46.9
CHP61L	CHP61L_sub6_3	D-Pro	D-Tyr	L-Nal	D-Abu	D-Nal	D-Leu	853.033	852.4209	875.4107	875.5784	O=C([C@H]1CCCN1C([C@H]2CC(C)C)=O)N[C@H](CC(C=C3)=CC=C3O)C(N[C@H](C(N[C@@H](C(N[C@@H](C(N2)=O)CC4=CC(C=CC=C5)=C5C=C4)=O)CC)=O)CC4=CC(C=CC=C5)=C5C=C4)=O	5.37			73%	51.6
CHP61L	CHP61L_sub6_4	D-Pro	D-Tyr	L-Nal	D-Abu	D-Thi	D-Leu	808.995	808.3617	831.3515	831.5076	O=C([C@H]1CCCN1C([C@H]2CC(C)C)=O)N[C@H](CC(C=C3)=CC=C3O)C(N[C@H](C(N[C@@H](C(N[C@@H](C(N2)=O)CC4=CC=CS4)=O)CC)=O)CC4=CC(C=CC=C5)=C5C=C4)=O	4.36			74%	50.6
CHP61L	CHP61L_sub6_5	D-Pro	D-Tyr	L-Nal	D-Nva	D-Ala	D-Leu	740.902	740.3897	763.3795	763.5004	O=C([C@H]1CCCN1C([C@H]2CC(C)C)=O)N[C@H](CC(C=C3)=CC=C3O)C(N[C@H](C(N[C@@H](C(N[C@@H](C(N2)=O)C)=O)CCC)=O)CC4=CC(C=CC=C5)=C5C=C4)=O	3.33			86%	25.9
CHP61L	CHP61L_sub6_6	D-Pro	D-Tyr	L-Nal	D-Nva	D-Leu	D-Leu	782.983	782.4366	805.4264	805.5625	O=C([C@H]1CCCN1C([C@H]2CC(C)C)=O)N[C@H](CC(C=C3)=CC=C3O)C(N[C@H](C(N[C@@H](C(N[C@@H](C(N2)=O)CC(C)C)=O)CCC)=O)CC4=CC(C=CC=C5)=C5C=C4)=O	4.08			61%	81.7
CHP61L	CHP61L_sub6_7	D-Pro	D-Tyr	L-Nal	D-Nva	D-Nal	D-Leu	867.06	866.4366	889.4264	889.5932	O=C([C@H]1CCCN1C([C@H]2CC(C)C)=O)N[C@H](CC(C=C3)=CC=C3O)C(N[C@H](C(N[C@@H](C(N[C@@H](C(N2)=O)CC4=CC(C=CC=C5)=C5C=C4)=O)CCC)=O)CC4=CC(C=CC=C5)=C5C=C4)=O	5.61			85%	27.4
CHP61L	CHP61L_sub6_8	D-Pro	D-Tyr	L-Nal	D-Nva	D-Thi	D-Leu	823.022	822.3774	845.3672	845.5158	O=C([C@H]1CCCN1C([C@H]2CC(C)C)=O)N[C@H](CC(C=C3)=CC=C3O)C(N[C@H](C(N[C@@H](C(N[C@@H](C(N2)=O)CC4=CC=CS4)=O)CCC)=O)CC4=CC(C=CC=C5)=C5C=C4)=O	4.54			66%	69.2
CHP61L	CHP61L_sub6_9	D-Pro	D-Tyr	L-Nal	D-Phe	D-Ala	D-Leu	788.946	788.3897	811.3795	811.5192	O=C([C@H]1CCCN1C([C@H]2CC(C)C)=O)N[C@H](CC(C=C3)=CC=C3O)C(N[C@H](C(N[C@@H](C(N[C@@H](C(N2)=O)C)=O)CC4=CC=CC=C4)=O)CC4=CC(C=CC=C5)=C5C=C4)=O	4.11			84%	28.2
CHP61L	CHP61L_sub6_10	D-Pro	D-Tyr	L-Nal	D-Phe	D-Leu	D-Leu	831.027	830.4366	853.4264	853.5846	O=C([C@H]1CCCN1C([C@H]2CC(C)C)=O)N[C@H](CC(C=C3)=CC=C3O)C(N[C@H](C(N[C@@H](C(N[C@@H](C(N2)=O)CC(C)C)=O)CC4=CC=CC=C4)=O)CC4=CC(C=CC=C5)=C5C=C4)=O	4.71			80%	36.7
CHP61L	CHP61L_sub6_11	D-Pro	D-Tyr	L-Nal	D-Phe	D-Nal	D-Leu	915.104	914.4366	937.4264	937.6209	O=C([C@H]1CCCN1C([C@H]2CC(C)C)=O)N[C@H](CC(C=C3)=CC=C3O)C(N[C@H](C(N[C@@H](C(N[C@@H](C(N2)=O)CC4=CC(C=CC=C5)=C5C=C4)=O)CC6=CC=CC=C6)=O)CC4=CC(C=CC=C5)=C5C=C4)=O	6.09			105%	-8
CHP61L	CHP61L_sub6_12	D-Pro	D-Tyr	L-Nal	D-Phe	D-Thi	D-Leu	871.066	870.3774	893.3672	893.544	O=C([C@H]1CCCN1C([C@H]2CC(C)C)=O)N[C@H](CC(C=C3)=CC=C3O)C(N[C@H](C(N[C@@H](C(N[C@@H](C(N2)=O)CC4=CC=CS4)=O)CC5=CC=CC=C5)=O)CC4=CC(C=CC=C5)=C5C=C4)=O	5.08			78%	41.8
CHP61L	CHP61L_sub6_13	D-Pro	D-Tyr	L-Nal	D-Phe(4F)	D-Ala	D-Leu	806.9364	806.3803	829.3701	829.5109	O=C([C@H]1CCCN1C([C@H]2CC(C)C)=O)N[C@H](CC(C=C3)=CC=C3O)C(N[C@H](C(N[C@@H](C(N[C@@H](C(N2)=O)C)=O)CC4=CC=C(F)C=C4)=O)CC4=CC(C=CC=C5)=C5C=C4)=O	3.99			79%	40.1
CHP61L	CHP61L_sub6_14	D-Pro	D-Tyr	L-Nal	D-Phe(4F)	D-Leu	D-Leu	849.0174	848.4272	871.417	871.5724	O=C([C@H]1CCCN1C([C@H]2CC(C)C)=O)N[C@H](CC(C=C3)=CC=C3O)C(N[C@H](C(N[C@@H](C(N[C@@H](C(N2)=O)CC(C)C)=O)CC4=CC=C(F)C=C4)=O)CC4=CC(C=CC=C5)=C5C=C4)=O	4.68			87%	22.5
CHP61L	CHP61L_sub6_15	D-Pro	D-Tyr	L-Nal	D-Phe(4F)	D-Nal	D-Leu	933.0944	932.4272	955.417	955.6132	O=C([C@H]1CCCN1C([C@H]2CC(C)C)=O)N[C@H](CC(C=C3)=CC=C3O)C(N[C@H](C(N[C@@H](C(N[C@@H](C(N2)=O)CC4=CC(C=CC=C5)=C5C=C4)=O)CC6=CC=C(F)C=C6)=O)CC4=CC(C=CC=C5)=C5C=C4)=O	5.99			110%	-15.8
CHP61L	CHP61L_sub6_16	D-Pro	D-Tyr	L-Nal	D-Phe(4F)	D-Thi	D-Leu	889.0564	888.368	911.3578	911.5369	O=C([C@H]1CCCN1C([C@H]2CC(C)C)=O)N[C@H](CC(C=C3)=CC=C3O)C(N[C@H](C(N[C@@H](C(N[C@@H](C(N2)=O)CC4=CC=CS4)=O)CC5=CC=C(F)C=C5)=O)CC4=CC(C=CC=C5)=C5C=C4)=O	5.11			89%	19.1
CHP61L	CHP61L_sub7_1	D-Pro	D-Tyr	L-Phe(4F)	D-Abu	D-Ala	D-Leu	694.8054	694.349	717.3388	717.4938	O=C([C@H]1CCCN1C([C@H]2CC(C)C)=O)N[C@H](CC(C=C3)=CC=C3O)C(N[C@H](C(N[C@@H](C(N[C@@H](C(N2)=O)C)=O)CC)=O)CC4=CC=C(F)C=C4)=O	2.1			105%	-8.2
CHP61L	CHP61L_sub7_2	D-Pro	D-Tyr	L-Phe(4F)	D-Abu	D-Leu	D-Leu	736.8864	736.3959	759.3857	759.5537	O=C([C@H]1CCCN1C([C@H]2CC(C)C)=O)N[C@H](CC(C=C3)=CC=C3O)C(N[C@H](C(N[C@@H](C(N[C@@H](C(N2)=O)CC(C)C)=O)CC)=O)CC4=CC=C(F)C=C4)=O	2.66			102%	-2.6
CHP61L	CHP61L_sub7_3	D-Pro	D-Tyr	L-Phe(4F)	D-Abu	D-Nal	D-Leu	820.9634	820.3959	843.3857	843.5956	O=C([C@H]1CCCN1C([C@H]2CC(C)C)=O)N[C@H](CC(C=C3)=CC=C3O)C(N[C@H](C(N[C@@H](C(N[C@@H](C(N2)=O)CC4=CC(C=CC=C5)=C5C=C4)=O)CC)=O)CC4=CC=C(F)C=C4)=O	4.37			41%	150
CHP61L	CHP61L_sub7_4	D-Pro	D-Tyr	L-Phe(4F)	D-Abu	D-Thi	D-Leu	776.9254	776.3367	799.3265	799.5345	O=C([C@H]1CCCN1C([C@H]2CC(C)C)=O)N[C@H](CC(C=C3)=CC=C3O)C(N[C@H](C(N[C@@H](C(N[C@@H](C(N2)=O)CC4=CC=CS4)=O)CC)=O)CC4=CC=C(F)C=C4)=O	3.56			100%	-0.2
CHP61L	CHP61L_sub7_5	D-Pro	D-Tyr	L-Phe(4F)	D-Nva	D-Ala	D-Leu	708.8324	708.3647	731.3545	731.5179	O=C([C@H]1CCCN1C([C@H]2CC(C)C)=O)N[C@H](CC(C=C3)=CC=C3O)C(N[C@H](C(N[C@@H](C(N[C@@H](C(N2)=O)C)=O)CCC)=O)CC4=CC=C(F)C=C4)=O	2.26			105%	-7.6
CHP61L	CHP61L_sub7_6	D-Pro	D-Tyr	L-Phe(4F)	D-Nva	D-Leu	D-Leu	750.9134	750.4116	773.4014	773.5765	O=C([C@H]1CCCN1C([C@H]2CC(C)C)=O)N[C@H](CC(C=C3)=CC=C3O)C(N[C@H](C(N[C@@H](C(N[C@@H](C(N2)=O)CC(C)C)=O)CCC)=O)CC4=CC=C(F)C=C4)=O	3.11			99%	1.3
CHP61L	CHP61L_sub7_7	D-Pro	D-Tyr	L-Phe(4F)	D-Nva	D-Nal	D-Leu	834.9904	834.4116	857.4014	857.6139	O=C([C@H]1CCCN1C([C@H]2CC(C)C)=O)N[C@H](CC(C=C3)=CC=C3O)C(N[C@H](C(N[C@@H](C(N[C@@H](C(N2)=O)CC4=CC(C=CC=C5)=C5C=C4)=O)CCC)=O)CC4=CC=C(F)C=C4)=O	4.65			74%	49.3
CHP61L	CHP61L_sub7_8	D-Pro	D-Tyr	L-Phe(4F)	D-Nva	D-Thi	D-Leu	790.9524	790.3524	813.3422	813.529	O=C([C@H]1CCCN1C([C@H]2CC(C)C)=O)N[C@H](CC(C=C3)=CC=C3O)C(N[C@H](C(N[C@@H](C(N[C@@H](C(N2)=O)CC4=CC=CS4)=O)CCC)=O)CC4=CC=C(F)C=C4)=O	3.74			95%	8.4
CHP61L	CHP61L_sub7_9	D-Pro	D-Tyr	L-Phe(4F)	D-Phe	D-Ala	D-Leu	756.8764	756.3647	779.3545	779.5289	O=C([C@H]1CCCN1C([C@H]2CC(C)C)=O)N[C@H](CC(C=C3)=CC=C3O)C(N[C@H](C(N[C@@H](C(N[C@@H](C(N2)=O)C)=O)CC4=CC=CC=C4)=O)CC4=CC=C(F)C=C4)=O	2.99			98%	3.4
CHP61L	CHP61L_sub7_10	D-Pro	D-Tyr	L-Phe(4F)	D-Phe	D-Leu	D-Leu	798.9574	798.4116	821.4014	821.5965	O=C([C@H]1CCCN1C([C@H]2CC(C)C)=O)N[C@H](CC(C=C3)=CC=C3O)C(N[C@H](C(N[C@@H](C(N[C@@H](C(N2)=O)CC(C)C)=O)CC4=CC=CC=C4)=O)CC4=CC=C(F)C=C4)=O	3.62			82%	32.4
CHP61L	CHP61L_sub7_11	D-Pro	D-Tyr	L-Phe(4F)	D-Phe	D-Nal	D-Leu	883.0344	882.4116	905.4014	905.6373	O=C([C@H]1CCCN1C([C@H]2CC(C)C)=O)N[C@H](CC(C=C3)=CC=C3O)C(N[C@H](C(N[C@@H](C(N[C@@H](C(N2)=O)CC4=CC(C=CC=C5)=C5C=C4)=O)CC6=CC=CC=C6)=O)CC4=CC=C(F)C=C4)=O	5.2			106%	-9
CHP61L	CHP61L_sub7_12	D-Pro	D-Tyr	L-Phe(4F)	D-Phe	D-Thi	D-Leu	838.9964	838.3524	861.3422	861.5643	O=C([C@H]1CCCN1C([C@H]2CC(C)C)=O)N[C@H](CC(C=C3)=CC=C3O)C(N[C@H](C(N[C@@H](C(N[C@@H](C(N2)=O)CC4=CC=CS4)=O)CC5=CC=CC=C5)=O)CC4=CC=C(F)C=C4)=O	4.34			56%	95.9
CHP61L	CHP61L_sub7_13	D-Pro	D-Tyr	L-Phe(4F)	D-Phe(4F)	D-Ala	D-Leu	774.8668	774.3553	797.3451	797.5271	O=C([C@H]1CCCN1C([C@H]2CC(C)C)=O)N[C@H](CC(C=C3)=CC=C3O)C(N[C@H](C(N[C@@H](C(N[C@@H](C(N2)=O)C)=O)CC4=CC=C(F)C=C4)=O)CC4=CC=C(F)C=C4)=O	3.09			96%	6.9
CHP61L	CHP61L_sub7_14	D-Pro	D-Tyr	L-Phe(4F)	D-Phe(4F)	D-Leu	D-Leu	816.9478	816.4022	839.392	839.5843	O=C([C@H]1CCCN1C([C@H]2CC(C)C)=O)N[C@H](CC(C=C3)=CC=C3O)C(N[C@H](C(N[C@@H](C(N[C@@H](C(N2)=O)CC(C)C)=O)CC4=CC=C(F)C=C4)=O)CC4=CC=C(F)C=C4)=O	3.52			72%	53.7
CHP61L	CHP61L_sub7_15	D-Pro	D-Tyr	L-Phe(4F)	D-Phe(4F)	D-Nal	D-Leu	901.0248	900.4022	923.392	923.6344	O=C([C@H]1CCCN1C([C@H]2CC(C)C)=O)N[C@H](CC(C=C3)=CC=C3O)C(N[C@H](C(N[C@@H](C(N[C@@H](C(N2)=O)CC4=CC(C=CC=C5)=C5C=C4)=O)CC6=CC=C(F)C=C6)=O)CC4=CC=C(F)C=C4)=O	5.11			111%	-17.9
CHP61L	CHP61L_sub7_16	D-Pro	D-Tyr	L-Phe(4F)	D-Phe(4F)	D-Thi	D-Leu	856.9868	856.343	879.3328	879.5611	O=C([C@H]1CCCN1C([C@H]2CC(C)C)=O)N[C@H](CC(C=C3)=CC=C3O)C(N[C@H](C(N[C@@H](C(N[C@@H](C(N2)=O)CC4=CC=CS4)=O)CC5=CC=C(F)C=C5)=O)CC4=CC=C(F)C=C4)=O	4.25			54%	103.1
CHP61L	CHP61L_sub8_1	D-Pro	D-Tyr	L-Thi	D-Abu	D-Ala	D-Leu	682.837	682.3148	705.3046	705.4873	O=C([C@H]1CCCN1C([C@H]2CC(C)C)=O)N[C@H](CC(C=C3)=CC=C3O)C(N[C@H](C(N[C@@H](C(N[C@@H](C(N2)=O)C)=O)CC)=O)CC4=CC=CS4)=O	1.92			94%	10.1
CHP61L	CHP61L_sub8_2	D-Pro	D-Tyr	L-Thi	D-Abu	D-Leu	D-Leu	724.918	724.3617	747.3515	747.5504	O=C([C@H]1CCCN1C([C@H]2CC(C)C)=O)N[C@H](CC(C=C3)=CC=C3O)C(N[C@H](C(N[C@@H](C(N[C@@H](C(N2)=O)CC(C)C)=O)CC)=O)CC4=CC=CS4)=O	2.51			97%	4.9
CHP61L	CHP61L_sub8_3	D-Pro	D-Tyr	L-Thi	D-Abu	D-Nal	D-Leu	808.995	808.3617	831.3515	831.593	O=C([C@H]1CCCN1C([C@H]2CC(C)C)=O)N[C@H](CC(C=C3)=CC=C3O)C(N[C@H](C(N[C@@H](C(N[C@@H](C(N2)=O)CC4=CC(C=CC=C5)=C5C=C4)=O)CC)=O)CC4=CC=CS4)=O	4.37			43%	142.1
CHP61L	CHP61L_sub8_4	D-Pro	D-Tyr	L-Thi	D-Abu	D-Thi	D-Leu	764.957	764.3025	787.2923	787.5175	O=C([C@H]1CCCN1C([C@H]2CC(C)C)=O)N[C@H](CC(C=C3)=CC=C3O)C(N[C@H](C(N[C@@H](C(N[C@@H](C(N2)=O)CC4=CC=CS4)=O)CC)=O)CC4=CC=CS4)=O	3.04			97%	5.9
CHP61L	CHP61L_sub8_5	D-Pro	D-Tyr	L-Thi	D-Nva	D-Ala	D-Leu	696.864	696.3305	719.3203	719.5119	O=C([C@H]1CCCN1C([C@H]2CC(C)C)=O)N[C@H](CC(C=C3)=CC=C3O)C(N[C@H](C(N[C@@H](C(N[C@@H](C(N2)=O)C)=O)CCC)=O)CC4=CC=CS4)=O	2.27			101%	-2
CHP61L	CHP61L_sub8_6	D-Pro	D-Tyr	L-Thi	D-Nva	D-Leu	D-Leu	738.945	738.3774	761.3672	761.5711	O=C([C@H]1CCCN1C([C@H]2CC(C)C)=O)N[C@H](CC(C=C3)=CC=C3O)C(N[C@H](C(N[C@@H](C(N[C@@H](C(N2)=O)CC(C)C)=O)CCC)=O)CC4=CC=CS4)=O	2.88			90%	18.3
CHP61L	CHP61L_sub8_7	D-Pro	D-Tyr	L-Thi	D-Nva	D-Nal	D-Leu	823.022	822.3774	845.3672	845.6127	O=C([C@H]1CCCN1C([C@H]2CC(C)C)=O)N[C@H](CC(C=C3)=CC=C3O)C(N[C@H](C(N[C@@H](C(N[C@@H](C(N2)=O)CC4=CC(C=CC=C5)=C5C=C4)=O)CCC)=O)CC4=CC=CS4)=O	4.54			61%	83.5
CHP61L	CHP61L_sub8_8	D-Pro	D-Tyr	L-Thi	D-Nva	D-Thi	D-Leu	778.984	778.3182	801.308	801.5301	O=C([C@H]1CCCN1C([C@H]2CC(C)C)=O)N[C@H](CC(C=C3)=CC=C3O)C(N[C@H](C(N[C@@H](C(N[C@@H](C(N2)=O)CC4=CC=CS4)=O)CCC)=O)CC4=CC=CS4)=O	3.32			92%	14.4
CHP61L	CHP61L_sub8_9	D-Pro	D-Tyr	L-Thi	D-Phe	D-Ala	D-Leu	744.908	744.3305	767.3203	767.5329	O=C([C@H]1CCCN1C([C@H]2CC(C)C)=O)N[C@H](CC(C=C3)=CC=C3O)C(N[C@H](C(N[C@@H](C(N[C@@H](C(N2)=O)C)=O)CC4=CC=CC=C4)=O)CC4=CC=CS4)=O	2.97			95%	9.2
CHP61L	CHP61L_sub8_10	D-Pro	D-Tyr	L-Thi	D-Phe	D-Leu	D-Leu	786.989	786.3774	809.3672	809.5957	O=C([C@H]1CCCN1C([C@H]2CC(C)C)=O)N[C@H](CC(C=C3)=CC=C3O)C(N[C@H](C(N[C@@H](C(N[C@@H](C(N2)=O)CC(C)C)=O)CC4=CC=CC=C4)=O)CC4=CC=CS4)=O	3.31			77%	44.6
CHP61L	CHP61L_sub8_11	D-Pro	D-Tyr	L-Thi	D-Phe	D-Nal	D-Leu	871.066	870.3774	893.3672	893.6386	O=C([C@H]1CCCN1C([C@H]2CC(C)C)=O)N[C@H](CC(C=C3)=CC=C3O)C(N[C@H](C(N[C@@H](C(N[C@@H](C(N2)=O)CC4=CC(C=CC=C5)=C5C=C4)=O)CC6=CC=CC=C6)=O)CC4=CC=CS4)=O	5.07			67%	66.6
CHP61L	CHP61L_sub8_12	D-Pro	D-Tyr	L-Thi	D-Phe	D-Thi	D-Leu	827.028	826.3182	849.308	849.5643	O=C([C@H]1CCCN1C([C@H]2CC(C)C)=O)N[C@H](CC(C=C3)=CC=C3O)C(N[C@H](C(N[C@@H](C(N[C@@H](C(N2)=O)CC4=CC=CS4)=O)CC5=CC=CC=C5)=O)CC4=CC=CS4)=O	4.02			58%	90.9
CHP61L	CHP61L_sub8_13	D-Pro	D-Tyr	L-Thi	D-Phe(4F)	D-Ala	D-Leu	762.8984	762.3211	785.3109	785.5256	O=C([C@H]1CCCN1C([C@H]2CC(C)C)=O)N[C@H](CC(C=C3)=CC=C3O)C(N[C@H](C(N[C@@H](C(N[C@@H](C(N2)=O)C)=O)CC4=CC=C(F)C=C4)=O)CC4=CC=CS4)=O	3.28			95%	8.8
CHP61L	CHP61L_sub8_14	D-Pro	D-Tyr	L-Thi	D-Phe(4F)	D-Leu	D-Leu	804.9794	804.368	827.3578	827.5889	O=C([C@H]1CCCN1C([C@H]2CC(C)C)=O)N[C@H](CC(C=C3)=CC=C3O)C(N[C@H](C(N[C@@H](C(N[C@@H](C(N2)=O)CC(C)C)=O)CC4=CC=C(F)C=C4)=O)CC4=CC=CS4)=O	3.51			79%	38.4
CHP61L	CHP61L_sub8_15	D-Pro	D-Tyr	L-Thi	D-Phe(4F)	D-Nal	D-Leu	889.0564	888.368	911.3578	911.6371	O=C([C@H]1CCCN1C([C@H]2CC(C)C)=O)N[C@H](CC(C=C3)=CC=C3O)C(N[C@H](C(N[C@@H](C(N[C@@H](C(N2)=O)CC4=CC(C=CC=C5)=C5C=C4)=O)CC6=CC=C(F)C=C6)=O)CC4=CC=CS4)=O	5.12			73%	52.8
CHP61L	CHP61L_sub8_16	D-Pro	D-Tyr	L-Thi	D-Phe(4F)	D-Thi	D-Leu	845.0184	844.3088	867.2986	867.5588	O=C([C@H]1CCCN1C([C@H]2CC(C)C)=O)N[C@H](CC(C=C3)=CC=C3O)C(N[C@H](C(N[C@@H](C(N[C@@H](C(N2)=O)CC4=CC=CS4)=O)CC5=CC=C(F)C=C5)=O)CC4=CC=CS4)=O	4.17			47%	126.4
CHP64L	CHP64L_sub1_1	D-Pro	D-Tyr	D-Ala	D-Abu	D-Ala	D-Leu	600.717	600.3271	623.3169	623.2397	O=C([C@H]1CCCN1C([C@H]2CC(C)C)=O)N[C@H](CC(C=C3)=CC=C3O)C(N[C@@H](C(N[C@@H](C(N[C@@H](C(N2)=O)C)=O)CC)=O)C)=O	0.79	5.30.E-10	-9.28	84%	29.1
CHP64L	CHP64L_sub1_2	D-Pro	D-Tyr	D-Ala	D-Abu	D-Leu	D-Leu	642.798	642.374	665.3638	665.2933	O=C([C@H]1CCCN1C([C@H]2CC(C)C)=O)N[C@H](CC(C=C3)=CC=C3O)C(N[C@@H](C(N[C@@H](C(N[C@@H](C(N2)=O)CC(C)C)=O)CC)=O)C)=O	1.61	5.69.E-10	-9.24	91%	16
CHP64L	CHP64L_sub1_3	D-Pro	D-Tyr	D-Ala	D-Abu	D-Nal	D-Leu	726.875	726.374	749.3638	749.3206	O=C([C@H]1CCCN1C([C@H]2CC(C)C)=O)N[C@H](CC(C=C3)=CC=C3O)C(N[C@@H](C(N[C@@H](C(N[C@@H](C(N2)=O)CC4=CC(C=CC=C5)=C5C=C4)=O)CC)=O)C)=O	3.05	8.40.E-09	-8.08	32%	190.4
CHP64L	CHP64L_sub1_4	D-Pro	D-Tyr	D-Ala	D-Abu	D-Thi	D-Leu	682.837	682.3148	705.3046	705.2654	O=C([C@H]1CCCN1C([C@H]2CC(C)C)=O)N[C@H](CC(C=C3)=CC=C3O)C(N[C@@H](C(N[C@@H](C(N[C@@H](C(N2)=O)CC4=CC=CS4)=O)CC)=O)C)=O	1.96	1.43.E-09	-8.85	79%	39.2
CHP64L	CHP64L_sub1_5	D-Pro	D-Tyr	D-Ala	D-Nva	D-Ala	D-Leu	614.744	614.3428	637.3326	637.2552	O=C([C@H]1CCCN1C([C@H]2CC(C)C)=O)N[C@H](CC(C=C3)=CC=C3O)C(N[C@@H](C(N[C@@H](C(N[C@@H](C(N2)=O)C)=O)CCC)=O)C)=O	1.21	5.97.E-10	-9.22	91%	16.3
CHP64L	CHP64L_sub1_6	D-Pro	D-Tyr	D-Ala	D-Nva	D-Leu	D-Leu	656.825	656.3897	679.3795	679.3085	O=C([C@H]1CCCN1C([C@H]2CC(C)C)=O)N[C@H](CC(C=C3)=CC=C3O)C(N[C@@H](C(N[C@@H](C(N[C@@H](C(N2)=O)CC(C)C)=O)CCC)=O)C)=O	1.98	5.22.E-09	-8.28	89%	20
CHP64L	CHP64L_sub1_7	D-Pro	D-Tyr	D-Ala	D-Nva	D-Nal	D-Leu	740.902	740.3897	763.3795	763.3352	O=C([C@H]1CCCN1C([C@H]2CC(C)C)=O)N[C@H](CC(C=C3)=CC=C3O)C(N[C@@H](C(N[C@@H](C(N[C@@H](C(N2)=O)CC4=CC(C=CC=C5)=C5C=C4)=O)CCC)=O)C)=O	3.35	5.68.E-08	-7.25	25%	229.9
CHP64L	CHP64L_sub1_8	D-Pro	D-Tyr	D-Ala	D-Nva	D-Thi	D-Leu	696.864	696.3305	719.3203	719.2613	O=C([C@H]1CCCN1C([C@H]2CC(C)C)=O)N[C@H](CC(C=C3)=CC=C3O)C(N[C@@H](C(N[C@@H](C(N[C@@H](C(N2)=O)CC4=CC=CS4)=O)CCC)=O)C)=O	2.26	4.64.E-09	-8.33	68%	65.1
CHP64L	CHP64L_sub1_9	D-Pro	D-Tyr	D-Ala	D-Phe	D-Ala	D-Leu	662.788	662.3428	685.3326	685.2662	O=C([C@H]1CCCN1C([C@H]2CC(C)C)=O)N[C@H](CC(C=C3)=CC=C3O)C(N[C@@H](C(N[C@@H](C(N[C@@H](C(N2)=O)C)=O)CC4=CC=CC=C4)=O)C)=O	1.66	9.28.E-10	-9.03	90%	17
CHP64L	CHP64L_sub1_10	D-Pro	D-Tyr	D-Ala	D-Phe	D-Leu	D-Leu	704.869	704.3897	727.3795	727.326	O=C([C@H]1CCCN1C([C@H]2CC(C)C)=O)N[C@H](CC(C=C3)=CC=C3O)C(N[C@@H](C(N[C@@H](C(N[C@@H](C(N2)=O)CC(C)C)=O)CC4=CC=CC=C4)=O)C)=O	2.32	2.37.E-08	-7.63	85%	26.6
CHP64L	CHP64L_sub1_11	D-Pro	D-Tyr	D-Ala	D-Phe	D-Nal	D-Leu	788.946	788.3897	811.3795	811.3528	O=C([C@H]1CCCN1C([C@H]2CC(C)C)=O)N[C@H](CC(C=C3)=CC=C3O)C(N[C@@H](C(N[C@@H](C(N[C@@H](C(N2)=O)CC4=CC(C=CC=C5)=C5C=C4)=O)CC6=CC=CC=C6)=O)C)=O	4.12	3.29.E-07	-6.48	19%	274.9
CHP64L	CHP64L_sub1_12	D-Pro	D-Tyr	D-Ala	D-Phe	D-Thi	D-Leu	744.908	744.3305	767.3203	767.2871	O=C([C@H]1CCCN1C([C@H]2CC(C)C)=O)N[C@H](CC(C=C3)=CC=C3O)C(N[C@@H](C(N[C@@H](C(N[C@@H](C(N2)=O)CC4=CC=CS4)=O)CC5=CC=CC=C5)=O)C)=O	3.03	1.92.E-08	-7.72	63%	75.9
CHP64L	CHP64L_sub1_13	D-Pro	D-Tyr	D-Ala	D-Phe(4F)	D-Ala	D-Leu	680.7784	680.3334	703.3232	703.2629	O=C([C@H]1CCCN1C([C@H]2CC(C)C)=O)N[C@H](CC(C=C3)=CC=C3O)C(N[C@@H](C(N[C@@H](C(N[C@@H](C(N2)=O)C)=O)CC4=CC=C(F)C=C4)=O)C)=O	1.87	5.11.E-10	-9.29	88%	20.9
CHP64L	CHP64L_sub1_14	D-Pro	D-Tyr	D-Ala	D-Phe(4F)	D-Leu	D-Leu	722.8594	722.3803	745.3701	745.315	O=C([C@H]1CCCN1C([C@H]2CC(C)C)=O)N[C@H](CC(C=C3)=CC=C3O)C(N[C@@H](C(N[C@@H](C(N[C@@H](C(N2)=O)CC(C)C)=O)CC4=CC=C(F)C=C4)=O)C)=O	2.16	1.19.E-08	-7.93	82%	32.1
CHP64L	CHP64L_sub1_15	D-Pro	D-Tyr	D-Ala	D-Phe(4F)	D-Nal	D-Leu	806.9364	806.3803	829.3701	829.3447	O=C([C@H]1CCCN1C([C@H]2CC(C)C)=O)N[C@H](CC(C=C3)=CC=C3O)C(N[C@@H](C(N[C@@H](C(N[C@@H](C(N2)=O)CC4=CC(C=CC=C5)=C5C=C4)=O)CC6=CC=C(F)C=C6)=O)C)=O	3.99	2.11.E-07	-6.68	23%	243.6
CHP64L	CHP64L_sub1_16	D-Pro	D-Tyr	D-Ala	D-Phe(4F)	D-Thi	D-Leu	762.8984	762.3211	785.3109	785.2742	O=C([C@H]1CCCN1C([C@H]2CC(C)C)=O)N[C@H](CC(C=C3)=CC=C3O)C(N[C@@H](C(N[C@@H](C(N[C@@H](C(N2)=O)CC4=CC=CS4)=O)CC5=CC=C(F)C=C5)=O)C)=O	3.31	4.72.E-09	-8.33	53%	106.3
CHP64L	CHP64L_sub2_1	D-Pro	D-Tyr	D-Abu	D-Abu	D-Ala	D-Leu	614.744	614.3427	637.3325	637.2868	O=C([C@H]1CCCN1C([C@H]2CC(C)C)=O)N[C@H](CC(C=C3)=CC=C3O)C(N[C@@H](C(N[C@@H](C(N[C@@H](C(N2)=O)C)=O)CC)=O)CC)=O	1.09	6.52.E-10	-9.19	94%	9.8
CHP64L	CHP64L_sub2_2	D-Pro	D-Tyr	D-Abu	D-Abu	D-Leu	D-Leu	656.825	656.3896	679.3794	679.3429	O=C([C@H]1CCCN1C([C@H]2CC(C)C)=O)N[C@H](CC(C=C3)=CC=C3O)C(N[C@@H](C(N[C@@H](C(N[C@@H](C(N2)=O)CC(C)C)=O)CC)=O)CC)=O	1.98	2.74.E-09	-8.56	100%	-0.2
CHP64L	CHP64L_sub2_3	D-Pro	D-Tyr	D-Abu	D-Abu	D-Nal	D-Leu	740.902	740.3896	763.3794	763.3669	O=C([C@H]1CCCN1C([C@H]2CC(C)C)=O)N[C@H](CC(C=C3)=CC=C3O)C(N[C@@H](C(N[C@@H](C(N[C@@H](C(N2)=O)CC4=CC(C=CC=C5)=C5C=C4)=O)CC)=O)CC)=O	3.45	3.02.E-08	-7.52	42%	146.2
CHP64L	CHP64L_sub2_4	D-Pro	D-Tyr	D-Abu	D-Abu	D-Thi	D-Leu	696.864	696.3304	719.3202	719.3094	O=C([C@H]1CCCN1C([C@H]2CC(C)C)=O)N[C@H](CC(C=C3)=CC=C3O)C(N[C@@H](C(N[C@@H](C(N[C@@H](C(N2)=O)CC4=CC=CS4)=O)CC)=O)CC)=O	2.31	2.86.E-09	-8.54	104%	-6.2
CHP64L	CHP64L_sub2_5	D-Pro	D-Tyr	D-Abu	D-Nva	D-Ala	D-Leu	628.771	628.3584	651.3482	651.304	O=C([C@H]1CCCN1C([C@H]2CC(C)C)=O)N[C@H](CC(C=C3)=CC=C3O)C(N[C@@H](C(N[C@@H](C(N[C@@H](C(N2)=O)C)=O)CCC)=O)CC)=O	1.47	3.88.E-10	-9.41	106%	-8.9
CHP64L	CHP64L_sub2_6	D-Pro	D-Tyr	D-Abu	D-Nva	D-Leu	D-Leu	670.852	670.4053	693.3951	693.3342	O=C([C@H]1CCCN1C([C@H]2CC(C)C)=O)N[C@H](CC(C=C3)=CC=C3O)C(N[C@@H](C(N[C@@H](C(N[C@@H](C(N2)=O)CC(C)C)=O)CCC)=O)CC)=O	2.3	1.71.E-08	-7.77	102%	-2.8
CHP64L	CHP64L_sub2_7	D-Pro	D-Tyr	D-Abu	D-Nva	D-Nal	D-Leu	754.929	754.4053	777.3951	777.3883	O=C([C@H]1CCCN1C([C@H]2CC(C)C)=O)N[C@H](CC(C=C3)=CC=C3O)C(N[C@@H](C(N[C@@H](C(N[C@@H](C(N2)=O)CC4=CC(C=CC=C5)=C5C=C4)=O)CCC)=O)CC)=O	3.68	1.16.E-07	-6.94	32%	192.4
CHP64L	CHP64L_sub2_8	D-Pro	D-Tyr	D-Abu	D-Nva	D-Thi	D-Leu	710.891	710.3461	733.3359	733.3121	O=C([C@H]1CCCN1C([C@H]2CC(C)C)=O)N[C@H](CC(C=C3)=CC=C3O)C(N[C@@H](C(N[C@@H](C(N[C@@H](C(N2)=O)CC4=CC=CS4)=O)CCC)=O)CC)=O	2.61	5.72.E-09	-8.24	77%	43.9
CHP64L	CHP64L_sub2_9	D-Pro	D-Tyr	D-Abu	D-Phe	D-Ala	D-Leu	676.815	676.3584	699.3482	699.3178	O=C([C@H]1CCCN1C([C@H]2CC(C)C)=O)N[C@H](CC(C=C3)=CC=C3O)C(N[C@@H](C(N[C@@H](C(N[C@@H](C(N2)=O)C)=O)CC4=CC=CC=C4)=O)CC)=O	1.97	1.80.E-09	-8.74	105%	-7.6
CHP64L	CHP64L_sub2_10	D-Pro	D-Tyr	D-Abu	D-Phe	D-Leu	D-Leu	718.896	718.4053	741.3951	741.3744	O=C([C@H]1CCCN1C([C@H]2CC(C)C)=O)N[C@H](CC(C=C3)=CC=C3O)C(N[C@@H](C(N[C@@H](C(N[C@@H](C(N2)=O)CC(C)C)=O)CC4=CC=CC=C4)=O)CC)=O	2.83	6.08.E-08	-7.22	94%	10.5
CHP64L	CHP64L_sub2_11	D-Pro	D-Tyr	D-Abu	D-Phe	D-Nal	D-Leu	802.973	802.4053	825.3951	825.4037	O=C([C@H]1CCCN1C([C@H]2CC(C)C)=O)N[C@H](CC(C=C3)=CC=C3O)C(N[C@@H](C(N[C@@H](C(N[C@@H](C(N2)=O)CC4=CC(C=CC=C5)=C5C=C4)=O)CC6=CC=CC=C6)=O)CC)=O	4.42	4.07.E-07	-6.39	47%	126.8
CHP64L	CHP64L_sub2_12	D-Pro	D-Tyr	D-Abu	D-Phe	D-Thi	D-Leu	758.935	758.3461	781.3359	781.3396	O=C([C@H]1CCCN1C([C@H]2CC(C)C)=O)N[C@H](CC(C=C3)=CC=C3O)C(N[C@@H](C(N[C@@H](C(N[C@@H](C(N2)=O)CC4=CC=CS4)=O)CC5=CC=CC=C5)=O)CC)=O	3.33	3.51.E-08	-7.46	73%	53.4
CHP64L	CHP64L_sub2_13	D-Pro	D-Tyr	D-Abu	D-Phe(4F)	D-Ala	D-Leu	694.8054	694.349	717.3388	717.3089	O=C([C@H]1CCCN1C([C@H]2CC(C)C)=O)N[C@H](CC(C=C3)=CC=C3O)C(N[C@@H](C(N[C@@H](C(N[C@@H](C(N2)=O)C)=O)CC4=CC=C(F)C=C4)=O)CC)=O	2.11	6.31.E-10	-9.2	103%	-4.4
CHP64L	CHP64L_sub2_14	D-Pro	D-Tyr	D-Abu	D-Phe(4F)	D-Leu	D-Leu	736.8864	736.3959	759.3857	759.3662	O=C([C@H]1CCCN1C([C@H]2CC(C)C)=O)N[C@H](CC(C=C3)=CC=C3O)C(N[C@@H](C(N[C@@H](C(N[C@@H](C(N2)=O)CC(C)C)=O)CC4=CC=C(F)C=C4)=O)CC)=O	2.66	3.37.E-08	-7.47	89%	19.9
CHP64L	CHP64L_sub2_15	D-Pro	D-Tyr	D-Abu	D-Phe(4F)	D-Nal	D-Leu	820.9634	820.3959	843.3857	843.4066	O=C([C@H]1CCCN1C([C@H]2CC(C)C)=O)N[C@H](CC(C=C3)=CC=C3O)C(N[C@@H](C(N[C@@H](C(N[C@@H](C(N2)=O)CC4=CC(C=CC=C5)=C5C=C4)=O)CC6=CC=C(F)C=C6)=O)CC)=O	4.36	2.71.E-07	-6.57	56%	95.8
CHP64L	CHP64L_sub2_16	D-Pro	D-Tyr	D-Abu	D-Phe(4F)	D-Thi	D-Leu	776.9254	776.3367	799.3265	799.3301	O=C([C@H]1CCCN1C([C@H]2CC(C)C)=O)N[C@H](CC(C=C3)=CC=C3O)C(N[C@@H](C(N[C@@H](C(N[C@@H](C(N2)=O)CC4=CC=CS4)=O)CC5=CC=C(F)C=C5)=O)CC)=O	3.56	1.18.E-08	-7.93	68%	64.9
CHP64L	CHP64L_sub3_1	D-Pro	D-Tyr	D-Nva	D-Abu	D-Ala	D-Leu	628.771	628.3584	651.3482	651.389	O=C([C@H]1CCCN1C([C@H]2CC(C)C)=O)N[C@H](CC(C=C3)=CC=C3O)C(N[C@@H](C(N[C@@H](C(N[C@@H](C(N2)=O)C)=O)CC)=O)CCC)=O	1.46	4.25.E-10	-9.37	93%	11.5
CHP64L	CHP64L_sub3_2	D-Pro	D-Tyr	D-Nva	D-Abu	D-Leu	D-Leu	670.852	670.4053	693.3951	693.4458	O=C([C@H]1CCCN1C([C@H]2CC(C)C)=O)N[C@H](CC(C=C3)=CC=C3O)C(N[C@@H](C(N[C@@H](C(N[C@@H](C(N2)=O)CC(C)C)=O)CC)=O)CCC)=O	2.3	1.95.E-08	-7.71	94%	10.9
CHP64L	CHP64L_sub3_3	D-Pro	D-Tyr	D-Nva	D-Abu	D-Nal	D-Leu	754.929	754.4053	777.3951	777.4783	O=C([C@H]1CCCN1C([C@H]2CC(C)C)=O)N[C@H](CC(C=C3)=CC=C3O)C(N[C@@H](C(N[C@@H](C(N[C@@H](C(N2)=O)CC4=CC(C=CC=C5)=C5C=C4)=O)CC)=O)CCC)=O	3.68	1.17.E-07	-6.93	28%	211.8
CHP64L	CHP64L_sub3_4	D-Pro	D-Tyr	D-Nva	D-Abu	D-Thi	D-Leu	710.891	710.3461	733.3359	733.4123	O=C([C@H]1CCCN1C([C@H]2CC(C)C)=O)N[C@H](CC(C=C3)=CC=C3O)C(N[C@@H](C(N[C@@H](C(N[C@@H](C(N2)=O)CC4=CC=CS4)=O)CC)=O)CCC)=O	2.61	1.22.E-08	-7.91	79%	38.6
CHP64L	CHP64L_sub3_5	D-Pro	D-Tyr	D-Nva	D-Nva	D-Ala	D-Leu	642.798	642.3741	665.3639	665.4113	O=C([C@H]1CCCN1C([C@H]2CC(C)C)=O)N[C@H](CC(C=C3)=CC=C3O)C(N[C@@H](C(N[C@@H](C(N[C@@H](C(N2)=O)C)=O)CCC)=O)CCC)=O	1.86	3.30.E-09	-8.48	101%	-1.9
CHP64L	CHP64L_sub3_6	D-Pro	D-Tyr	D-Nva	D-Nva	D-Leu	D-Leu	684.879	684.421	707.4108	707.4606	O=C([C@H]1CCCN1C([C@H]2CC(C)C)=O)N[C@H](CC(C=C3)=CC=C3O)C(N[C@@H](C(N[C@@H](C(N[C@@H](C(N2)=O)CC(C)C)=O)CCC)=O)CCC)=O	2.57	7.64.E-08	-7.12	92%	14.6
CHP64L	CHP64L_sub3_7	D-Pro	D-Tyr	D-Nva	D-Nva	D-Nal	D-Leu	768.956	768.421	791.4108	791.4957	O=C([C@H]1CCCN1C([C@H]2CC(C)C)=O)N[C@H](CC(C=C3)=CC=C3O)C(N[C@@H](C(N[C@@H](C(N[C@@H](C(N2)=O)CC4=CC(C=CC=C5)=C5C=C4)=O)CCC)=O)CCC)=O	3.97	5.08.E-07	-6.29	27%	215.8
CHP64L	CHP64L_sub3_8	D-Pro	D-Tyr	D-Nva	D-Nva	D-Thi	D-Leu	724.918	724.3618	747.3516	747.4199	O=C([C@H]1CCCN1C([C@H]2CC(C)C)=O)N[C@H](CC(C=C3)=CC=C3O)C(N[C@@H](C(N[C@@H](C(N[C@@H](C(N2)=O)CC4=CC=CS4)=O)CCC)=O)CCC)=O	2.91	5.41.E-08	-7.27	68%	64.1
CHP64L	CHP64L_sub3_9	D-Pro	D-Tyr	D-Nva	D-Phe	D-Ala	D-Leu	690.842	690.3741	713.3639	713.4231	O=C([C@H]1CCCN1C([C@H]2CC(C)C)=O)N[C@H](CC(C=C3)=CC=C3O)C(N[C@@H](C(N[C@@H](C(N[C@@H](C(N2)=O)C)=O)CC4=CC=CC=C4)=O)CCC)=O	2.36	5.35.E-09	-8.27	96%	6.7
CHP64L	CHP64L_sub3_10	D-Pro	D-Tyr	D-Nva	D-Phe	D-Leu	D-Leu	732.923	732.421	755.4108	755.4901	O=C([C@H]1CCCN1C([C@H]2CC(C)C)=O)N[C@H](CC(C=C3)=CC=C3O)C(N[C@@H](C(N[C@@H](C(N[C@@H](C(N2)=O)CC(C)C)=O)CC4=CC=CC=C4)=O)CCC)=O	3.14	3.10.E-07	-6.51	85%	26.9
CHP64L	CHP64L_sub3_11	D-Pro	D-Tyr	D-Nva	D-Phe	D-Nal	D-Leu	817	816.421	839.4108	839.515	O=C([C@H]1CCCN1C([C@H]2CC(C)C)=O)N[C@H](CC(C=C3)=CC=C3O)C(N[C@@H](C(N[C@@H](C(N[C@@H](C(N2)=O)CC4=CC(C=CC=C5)=C5C=C4)=O)CC6=CC=CC=C6)=O)CCC)=O	4.68	8.46.E-07	-6.07	49%	120.4
CHP64L	CHP64L_sub3_12	D-Pro	D-Tyr	D-Nva	D-Phe	D-Thi	D-Leu	772.962	772.3618	795.3516	795.444	O=C([C@H]1CCCN1C([C@H]2CC(C)C)=O)N[C@H](CC(C=C3)=CC=C3O)C(N[C@@H](C(N[C@@H](C(N[C@@H](C(N2)=O)CC4=CC=CS4)=O)CC5=CC=CC=C5)=O)CCC)=O	3.49	1.68.E-07	-6.77	59%	87.6
CHP64L	CHP64L_sub3_13	D-Pro	D-Tyr	D-Nva	D-Phe(4F)	D-Ala	D-Leu	708.8324	708.3647	731.3545	731.4176	O=C([C@H]1CCCN1C([C@H]2CC(C)C)=O)N[C@H](CC(C=C3)=CC=C3O)C(N[C@@H](C(N[C@@H](C(N[C@@H](C(N2)=O)C)=O)CC4=CC=C(F)C=C4)=O)CCC)=O	2.26	1.90.E-09	-8.72	96%	6.6
CHP64L	CHP64L_sub3_14	D-Pro	D-Tyr	D-Nva	D-Phe(4F)	D-Leu	D-Leu	750.9134	750.4116	773.4014	773.4737	O=C([C@H]1CCCN1C([C@H]2CC(C)C)=O)N[C@H](CC(C=C3)=CC=C3O)C(N[C@@H](C(N[C@@H](C(N[C@@H](C(N2)=O)CC(C)C)=O)CC4=CC=C(F)C=C4)=O)CCC)=O	3.09	1.40.E-07	-6.85	82%	32.1
CHP64L	CHP64L_sub3_15	D-Pro	D-Tyr	D-Nva	D-Phe(4F)	D-Nal	D-Leu	834.9904	834.4116	857.4014	857.5133	O=C([C@H]1CCCN1C([C@H]2CC(C)C)=O)N[C@H](CC(C=C3)=CC=C3O)C(N[C@@H](C(N[C@@H](C(N[C@@H](C(N2)=O)CC4=CC(C=CC=C5)=C5C=C4)=O)CC6=CC=C(F)C=C6)=O)CCC)=O	4.63	4.80.E-07	-6.32	65%	72.4
CHP64L	CHP64L_sub3_16	D-Pro	D-Tyr	D-Nva	D-Phe(4F)	D-Thi	D-Leu	790.9524	790.3524	813.3422	813.4327	O=C([C@H]1CCCN1C([C@H]2CC(C)C)=O)N[C@H](CC(C=C3)=CC=C3O)C(N[C@@H](C(N[C@@H](C(N[C@@H](C(N2)=O)CC4=CC=CS4)=O)CC5=CC=C(F)C=C5)=O)CCC)=O	3.73	1.19.E-07	-6.92	53%	106.9
CHP64L	CHP64L_sub4_1	D-Pro	D-Tyr	D-Leu	D-Abu	D-Ala	D-Leu	642.798	642.374	665.3638	665.4063	O=C([C@H]1CCCN1C([C@H]2CC(C)C)=O)N[C@H](CC(C=C3)=CC=C3O)C(N[C@@H](C(N[C@@H](C(N[C@@H](C(N2)=O)C)=O)CC)=O)CC(C)C)=O	1.59	9.21.E-10	-9.04	97%	4.7
CHP64L	CHP64L_sub4_2	D-Pro	D-Tyr	D-Leu	D-Abu	D-Leu	D-Leu	684.879	684.4209	707.4107	707.4576	O=C([C@H]1CCCN1C([C@H]2CC(C)C)=O)N[C@H](CC(C=C3)=CC=C3O)C(N[C@@H](C(N[C@@H](C(N[C@@H](C(N2)=O)CC(C)C)=O)CC)=O)CC(C)C)=O	2.49	6.50.E-08	-7.19	82%	32.2
CHP64L	CHP64L_sub4_3	D-Pro	D-Tyr	D-Leu	D-Abu	D-Nal	D-Leu	768.956	768.4209	791.4107	791.4864	O=C([C@H]1CCCN1C([C@H]2CC(C)C)=O)N[C@H](CC(C=C3)=CC=C3O)C(N[C@@H](C(N[C@@H](C(N[C@@H](C(N2)=O)CC4=CC(C=CC=C5)=C5C=C4)=O)CC)=O)CC(C)C)=O	3.87	8.03.E-07	-6.1	24%	235.5
CHP64L	CHP64L_sub4_4	D-Pro	D-Tyr	D-Leu	D-Abu	D-Thi	D-Leu	724.918	724.3617	747.3515	747.4246	O=C([C@H]1CCCN1C([C@H]2CC(C)C)=O)N[C@H](CC(C=C3)=CC=C3O)C(N[C@@H](C(N[C@@H](C(N[C@@H](C(N2)=O)CC4=CC=CS4)=O)CC)=O)CC(C)C)=O	2.5	4.19.E-08	-7.38	66%	68.7
CHP64L	CHP64L_sub4_5	D-Pro	D-Tyr	D-Leu	D-Nva	D-Ala	D-Leu	656.825	656.3897	679.3795	679.4238	O=C([C@H]1CCCN1C([C@H]2CC(C)C)=O)N[C@H](CC(C=C3)=CC=C3O)C(N[C@@H](C(N[C@@H](C(N[C@@H](C(N2)=O)C)=O)CCC)=O)CC(C)C)=O	1.98	7.60.E-09	-8.12	98%	3.7
CHP64L	CHP64L_sub4_6	D-Pro	D-Tyr	D-Leu	D-Nva	D-Leu	D-Leu	698.906	698.4366	721.4264	721.4812	O=C([C@H]1CCCN1C([C@H]2CC(C)C)=O)N[C@H](CC(C=C3)=CC=C3O)C(N[C@@H](C(N[C@@H](C(N[C@@H](C(N2)=O)CC(C)C)=O)CCC)=O)CC(C)C)=O	2.72	2.72.E-07	-6.56	80%	36.9
CHP64L	CHP64L_sub4_7	D-Pro	D-Tyr	D-Leu	D-Nva	D-Nal	D-Leu	782.983	782.4366	805.4264	805.5068	O=C([C@H]1CCCN1C([C@H]2CC(C)C)=O)N[C@H](CC(C=C3)=CC=C3O)C(N[C@@H](C(N[C@@H](C(N[C@@H](C(N2)=O)CC4=CC(C=CC=C5)=C5C=C4)=O)CCC)=O)CC(C)C)=O	4.09	1.72.E-06	-5.76	21%	260.7
CHP64L	CHP64L_sub4_8	D-Pro	D-Tyr	D-Leu	D-Nva	D-Thi	D-Leu	738.945	738.3774	761.3672	761.4319	O=C([C@H]1CCCN1C([C@H]2CC(C)C)=O)N[C@H](CC(C=C3)=CC=C3O)C(N[C@@H](C(N[C@@H](C(N[C@@H](C(N2)=O)CC4=CC=CS4)=O)CCC)=O)CC(C)C)=O	2.87	1.54.E-07	-6.81	54%	102.1
CHP64L	CHP64L_sub4_9	D-Pro	D-Tyr	D-Leu	D-Phe	D-Ala	D-Leu	704.869	704.3897	727.3795	727.4343	O=C([C@H]1CCCN1C([C@H]2CC(C)C)=O)N[C@H](CC(C=C3)=CC=C3O)C(N[C@@H](C(N[C@@H](C(N[C@@H](C(N2)=O)C)=O)CC4=CC=CC=C4)=O)CC(C)C)=O	2.32	2.39.E-08	-7.62	96%	7.5
CHP64L	CHP64L_sub4_10	D-Pro	D-Tyr	D-Leu	D-Phe	D-Leu	D-Leu	746.95	746.4366	769.4264	769.496	O=C([C@H]1CCCN1C([C@H]2CC(C)C)=O)N[C@H](CC(C=C3)=CC=C3O)C(N[C@@H](C(N[C@@H](C(N[C@@H](C(N2)=O)CC(C)C)=O)CC4=CC=CC=C4)=O)CC(C)C)=O	3.05	1.07.E-06	-5.97	71%	57.2
CHP64L	CHP64L_sub4_11	D-Pro	D-Tyr	D-Leu	D-Phe	D-Nal	D-Leu	831.027	830.4366	853.4264	853.5226	O=C([C@H]1CCCN1C([C@H]2CC(C)C)=O)N[C@H](CC(C=C3)=CC=C3O)C(N[C@@H](C(N[C@@H](C(N[C@@H](C(N2)=O)CC4=CC(C=CC=C5)=C5C=C4)=O)CC6=CC=CC=C6)=O)CC(C)C)=O	4.71	2.33.E-06	-5.63	55%	99.5
CHP64L	CHP64L_sub4_12	D-Pro	D-Tyr	D-Leu	D-Phe	D-Thi	D-Leu	786.989	786.3774	809.3672	809.4524	O=C([C@H]1CCCN1C([C@H]2CC(C)C)=O)N[C@H](CC(C=C3)=CC=C3O)C(N[C@@H](C(N[C@@H](C(N[C@@H](C(N2)=O)CC4=CC=CS4)=O)CC5=CC=CC=C5)=O)CC(C)C)=O	3.31	5.83.E-07	-6.23	59%	88.7
CHP64L	CHP64L_sub4_13	D-Pro	D-Tyr	D-Leu	D-Phe(4F)	D-Ala	D-Leu	722.8594	722.3803	745.3701	745.4311	O=C([C@H]1CCCN1C([C@H]2CC(C)C)=O)N[C@H](CC(C=C3)=CC=C3O)C(N[C@@H](C(N[C@@H](C(N[C@@H](C(N2)=O)C)=O)CC4=CC=C(F)C=C4)=O)CC(C)C)=O	2.16	9.40.E-09	-8.03	99%	1.7
CHP64L	CHP64L_sub4_14	D-Pro	D-Tyr	D-Leu	D-Phe(4F)	D-Leu	D-Leu	764.9404	764.4272	787.417	787.4861	O=C([C@H]1CCCN1C([C@H]2CC(C)C)=O)N[C@H](CC(C=C3)=CC=C3O)C(N[C@@H](C(N[C@@H](C(N[C@@H](C(N2)=O)CC(C)C)=O)CC4=CC=C(F)C=C4)=O)CC(C)C)=O	3.06	6.18.E-07	-6.21	73%	52.2
CHP64L	CHP64L_sub4_15	D-Pro	D-Tyr	D-Leu	D-Phe(4F)	D-Nal	D-Leu	849.0174	848.4272	871.417	871.5192	O=C([C@H]1CCCN1C([C@H]2CC(C)C)=O)N[C@H](CC(C=C3)=CC=C3O)C(N[C@@H](C(N[C@@H](C(N[C@@H](C(N2)=O)CC4=CC(C=CC=C5)=C5C=C4)=O)CC6=CC=C(F)C=C6)=O)CC(C)C)=O	4.65	9.80.E-07	-6.01	67%	67.4
CHP64L	CHP64L_sub4_16	D-Pro	D-Tyr	D-Leu	D-Phe(4F)	D-Thi	D-Leu	804.9794	804.368	827.3578	827.4439	O=C([C@H]1CCCN1C([C@H]2CC(C)C)=O)N[C@H](CC(C=C3)=CC=C3O)C(N[C@@H](C(N[C@@H](C(N[C@@H](C(N2)=O)CC4=CC=CS4)=O)CC5=CC=C(F)C=C5)=O)CC(C)C)=O	3.53	4.39.E-07	-6.36	58%	91.5
CHP64L	CHP64L_sub5_1	D-Pro	D-Tyr	D-Phe	D-Abu	D-Ala	D-Leu	676.815	676.3584	699.3482	699.449	O=C([C@H]1CCCN1C([C@H]2CC(C)C)=O)N[C@H](CC(C=C3)=CC=C3O)C(N[C@@H](C(N[C@@H](C(N[C@@H](C(N2)=O)C)=O)CC)=O)CC4=CC=CC=C4)=O	1.97	6.05.E-10	-9.22	94%	9.8
CHP64L	CHP64L_sub5_2	D-Pro	D-Tyr	D-Phe	D-Abu	D-Leu	D-Leu	718.896	718.4053	741.3951	741.5043	O=C([C@H]1CCCN1C([C@H]2CC(C)C)=O)N[C@H](CC(C=C3)=CC=C3O)C(N[C@@H](C(N[C@@H](C(N[C@@H](C(N2)=O)CC(C)C)=O)CC)=O)CC4=CC=CC=C4)=O	2.83	5.77.E-08	-7.24	82%	32.6
CHP64L	CHP64L_sub5_3	D-Pro	D-Tyr	D-Phe	D-Abu	D-Nal	D-Leu	802.973	802.4053	825.3951	825.5367	O=C([C@H]1CCCN1C([C@H]2CC(C)C)=O)N[C@H](CC(C=C3)=CC=C3O)C(N[C@@H](C(N[C@@H](C(N[C@@H](C(N2)=O)CC4=CC(C=CC=C5)=C5C=C4)=O)CC)=O)CC4=CC=CC=C4)=O	4.42	4.27.E-07	-6.37	25%	234.2
CHP64L	CHP64L_sub5_4	D-Pro	D-Tyr	D-Phe	D-Abu	D-Thi	D-Leu	758.935	758.3461	781.3359	781.4786	O=C([C@H]1CCCN1C([C@H]2CC(C)C)=O)N[C@H](CC(C=C3)=CC=C3O)C(N[C@@H](C(N[C@@H](C(N[C@@H](C(N2)=O)CC4=CC=CS4)=O)CC)=O)CC4=CC=CC=C4)=O	3.32	6.72.E-08	-7.17	44%	135.5
CHP64L	CHP64L_sub5_5	D-Pro	D-Tyr	D-Phe	D-Nva	D-Ala	D-Leu	690.842	690.3741	713.3639	713.4668	O=C([C@H]1CCCN1C([C@H]2CC(C)C)=O)N[C@H](CC(C=C3)=CC=C3O)C(N[C@@H](C(N[C@@H](C(N[C@@H](C(N2)=O)C)=O)CCC)=O)CC4=CC=CC=C4)=O	2.36	1.44.E-08	-7.84	89%	18.6
CHP64L	CHP64L_sub5_6	D-Pro	D-Tyr	D-Phe	D-Nva	D-Leu	D-Leu	732.923	732.421	755.4108	755.5244	O=C([C@H]1CCCN1C([C@H]2CC(C)C)=O)N[C@H](CC(C=C3)=CC=C3O)C(N[C@@H](C(N[C@@H](C(N[C@@H](C(N2)=O)CC(C)C)=O)CCC)=O)CC4=CC=CC=C4)=O	3.13	2.44.E-07	-6.61	75%	46.9
CHP64L	CHP64L_sub5_7	D-Pro	D-Tyr	D-Phe	D-Nva	D-Nal	D-Leu	817	816.421	839.4108	839.5597	O=C([C@H]1CCCN1C([C@H]2CC(C)C)=O)N[C@H](CC(C=C3)=CC=C3O)C(N[C@@H](C(N[C@@H](C(N[C@@H](C(N2)=O)CC4=CC(C=CC=C5)=C5C=C4)=O)CCC)=O)CC4=CC=CC=C4)=O	4.67	4.88.E-07	-6.31	32%	192.3
CHP64L	CHP64L_sub5_8	D-Pro	D-Tyr	D-Phe	D-Nva	D-Thi	D-Leu	772.962	772.3618	795.3516	795.4851	O=C([C@H]1CCCN1C([C@H]2CC(C)C)=O)N[C@H](CC(C=C3)=CC=C3O)C(N[C@@H](C(N[C@@H](C(N[C@@H](C(N2)=O)CC4=CC=CS4)=O)CCC)=O)CC4=CC=CC=C4)=O	3.49	1.67.E-07	-6.78	26%	226.6
CHP64L	CHP64L_sub5_9	D-Pro	D-Tyr	D-Phe	D-Phe	D-Ala	D-Leu	738.886	738.3741	761.3639	761.4825	O=C([C@H]1CCCN1C([C@H]2CC(C)C)=O)N[C@H](CC(C=C3)=CC=C3O)C(N[C@@H](C(N[C@@H](C(N[C@@H](C(N2)=O)C)=O)CC4=CC=CC=C4)=O)CC4=CC=CC=C4)=O	2.92	8.45.E-09	-8.07	87%	23
CHP64L	CHP64L_sub5_10	D-Pro	D-Tyr	D-Phe	D-Phe	D-Leu	D-Leu	780.967	780.421	803.4108	803.5501	O=C([C@H]1CCCN1C([C@H]2CC(C)C)=O)N[C@H](CC(C=C3)=CC=C3O)C(N[C@@H](C(N[C@@H](C(N[C@@H](C(N2)=O)CC(C)C)=O)CC4=CC=CC=C4)=O)CC4=CC=CC=C4)=O	3.66	5.41.E-07	-6.27	66%	70.2
CHP64L	CHP64L_sub5_11	D-Pro	D-Tyr	D-Phe	D-Phe	D-Nal	D-Leu	865.044	864.421	887.4108	887.5846	O=C([C@H]1CCCN1C([C@H]2CC(C)C)=O)N[C@H](CC(C=C3)=CC=C3O)C(N[C@@H](C(N[C@@H](C(N[C@@H](C(N2)=O)CC4=CC(C=CC=C5)=C5C=C4)=O)CC6=CC=CC=C6)=O)CC4=CC=CC=C4)=O	5.27	1.33.E-07	-6.88	81%	34.4
CHP64L	CHP64L_sub5_12	D-Pro	D-Tyr	D-Phe	D-Phe	D-Thi	D-Leu	821.006	820.3618	843.3516	843.5193	O=C([C@H]1CCCN1C([C@H]2CC(C)C)=O)N[C@H](CC(C=C3)=CC=C3O)C(N[C@@H](C(N[C@@H](C(N[C@@H](C(N2)=O)CC4=CC=CS4)=O)CC5=CC=CC=C5)=O)CC4=CC=CC=C4)=O	4.21	2.19.E-07	-6.66	43%	141.3
CHP64L	CHP64L_sub5_13	D-Pro	D-Tyr	D-Phe	D-Phe(4F)	D-Ala	D-Leu	756.8764	756.3647	779.3545	779.4801	O=C([C@H]1CCCN1C([C@H]2CC(C)C)=O)N[C@H](CC(C=C3)=CC=C3O)C(N[C@@H](C(N[C@@H](C(N[C@@H](C(N2)=O)C)=O)CC4=CC=C(F)C=C4)=O)CC4=CC=CC=C4)=O	2.99	3.37.E-09	-8.47	90%	16.8
CHP64L	CHP64L_sub5_14	D-Pro	D-Tyr	D-Phe	D-Phe(4F)	D-Leu	D-Leu	798.9574	798.4116	821.4014	821.5452	O=C([C@H]1CCCN1C([C@H]2CC(C)C)=O)N[C@H](CC(C=C3)=CC=C3O)C(N[C@@H](C(N[C@@H](C(N[C@@H](C(N2)=O)CC(C)C)=O)CC4=CC=C(F)C=C4)=O)CC4=CC=CC=C4)=O	3.6	2.71.E-07	-6.57	66%	68.7
CHP64L	CHP64L_sub5_15	D-Pro	D-Tyr	D-Phe	D-Phe(4F)	D-Nal	D-Leu	883.0344	882.4116	905.4014	905.5825	O=C([C@H]1CCCN1C([C@H]2CC(C)C)=O)N[C@H](CC(C=C3)=CC=C3O)C(N[C@@H](C(N[C@@H](C(N[C@@H](C(N2)=O)CC4=CC(C=CC=C5)=C5C=C4)=O)CC6=CC=C(F)C=C6)=O)CC4=CC=CC=C4)=O	5.2	5.98.E-08	-7.22	91%	14.8
CHP64L	CHP64L_sub5_16	D-Pro	D-Tyr	D-Phe	D-Phe(4F)	D-Thi	D-Leu	838.9964	838.3524	861.3422	861.5111	O=C([C@H]1CCCN1C([C@H]2CC(C)C)=O)N[C@H](CC(C=C3)=CC=C3O)C(N[C@@H](C(N[C@@H](C(N[C@@H](C(N2)=O)CC4=CC=CS4)=O)CC5=CC=C(F)C=C5)=O)CC4=CC=CC=C4)=O	4.32	1.16.E-07	-6.94	54%	103.6
CHP64L	CHP64L_sub6_1	D-Pro	D-Tyr	D-Nal	D-Abu	D-Ala	D-Leu	726.875	726.374	749.3638	749.5438	O=C([C@H]1CCCN1C([C@H]2CC(C)C)=O)N[C@H](CC(C=C3)=CC=C3O)C(N[C@@H](C(N[C@@H](C(N[C@@H](C(N2)=O)C)=O)CC)=O)CC4=CC(C=CC=C5)=C5C=C4)=O	3.06	8.69.E-08	-7.06	88%	22.2
CHP64L	CHP64L_sub6_2	D-Pro	D-Tyr	D-Nal	D-Abu	D-Leu	D-Leu	768.956	768.4209	791.4107	791.6057	O=C([C@H]1CCCN1C([C@H]2CC(C)C)=O)N[C@H](CC(C=C3)=CC=C3O)C(N[C@@H](C(N[C@@H](C(N[C@@H](C(N2)=O)CC(C)C)=O)CC)=O)CC4=CC(C=CC=C5)=C5C=C4)=O	3.86	5.27.E-07	-6.28	58%	90.6
CHP64L	CHP64L_sub6_3	D-Pro	D-Tyr	D-Nal	D-Abu	D-Nal	D-Leu	853.033	852.4209	875.4107	875.6553	O=C([C@H]1CCCN1C([C@H]2CC(C)C)=O)N[C@H](CC(C=C3)=CC=C3O)C(N[C@@H](C(N[C@@H](C(N[C@@H](C(N2)=O)CC4=CC(C=CC=C5)=C5C=C4)=O)CC)=O)CC4=CC(C=CC=C5)=C5C=C4)=O	5.37	1.04.E-07	-6.98	61%	82.4
CHP64L	CHP64L_sub6_4	D-Pro	D-Tyr	D-Nal	D-Abu	D-Thi	D-Leu	808.995	808.3617	831.3515	831.5861	O=C([C@H]1CCCN1C([C@H]2CC(C)C)=O)N[C@H](CC(C=C3)=CC=C3O)C(N[C@@H](C(N[C@@H](C(N[C@@H](C(N2)=O)CC4=CC=CS4)=O)CC)=O)CC4=CC(C=CC=C5)=C5C=C4)=O	4.36	4.51.E-08	-7.35	24%	237.8
CHP64L	CHP64L_sub6_5	D-Pro	D-Tyr	D-Nal	D-Nva	D-Ala	D-Leu	740.902	740.3897	763.3795	763.5695	O=C([C@H]1CCCN1C([C@H]2CC(C)C)=O)N[C@H](CC(C=C3)=CC=C3O)C(N[C@@H](C(N[C@@H](C(N[C@@H](C(N2)=O)C)=O)CCC)=O)CC4=CC(C=CC=C5)=C5C=C4)=O	3.33	4.67.E-08	-7.33	80%	37.1
CHP64L	CHP64L_sub6_6	D-Pro	D-Tyr	D-Nal	D-Nva	D-Leu	D-Leu	782.983	782.4366	805.4264	805.6295	O=C([C@H]1CCCN1C([C@H]2CC(C)C)=O)N[C@H](CC(C=C3)=CC=C3O)C(N[C@@H](C(N[C@@H](C(N[C@@H](C(N2)=O)CC(C)C)=O)CCC)=O)CC4=CC(C=CC=C5)=C5C=C4)=O	4.08	8.36.E-07	-6.08	48%	121.1
CHP64L	CHP64L_sub6_7	D-Pro	D-Tyr	D-Nal	D-Nva	D-Nal	D-Leu	867.06	866.4366	889.4264	889.6759	O=C([C@H]1CCCN1C([C@H]2CC(C)C)=O)N[C@H](CC(C=C3)=CC=C3O)C(N[C@@H](C(N[C@@H](C(N[C@@H](C(N2)=O)CC4=CC(C=CC=C5)=C5C=C4)=O)CCC)=O)CC4=CC(C=CC=C5)=C5C=C4)=O	5.61	4.19.E-08	-7.38	76%	46.7
CHP64L	CHP64L_sub6_8	D-Pro	D-Tyr	D-Nal	D-Nva	D-Thi	D-Leu	823.022	822.3774	845.3672	845.5894	O=C([C@H]1CCCN1C([C@H]2CC(C)C)=O)N[C@H](CC(C=C3)=CC=C3O)C(N[C@@H](C(N[C@@H](C(N[C@@H](C(N2)=O)CC4=CC=CS4)=O)CCC)=O)CC4=CC(C=CC=C5)=C5C=C4)=O	4.54	1.41.E-07	-6.85	27%	215.9
CHP64L	CHP64L_sub6_9	D-Pro	D-Tyr	D-Nal	D-Phe	D-Ala	D-Leu	788.946	788.3897	811.3795	811.5886	O=C([C@H]1CCCN1C([C@H]2CC(C)C)=O)N[C@H](CC(C=C3)=CC=C3O)C(N[C@@H](C(N[C@@H](C(N[C@@H](C(N2)=O)C)=O)CC4=CC=CC=C4)=O)CC4=CC(C=CC=C5)=C5C=C4)=O	4.11	1.25.E-07	-6.9	83%	31.7
CHP64L	CHP64L_sub6_10	D-Pro	D-Tyr	D-Nal	D-Phe	D-Leu	D-Leu	831.027	830.4366	853.4264	853.6559	O=C([C@H]1CCCN1C([C@H]2CC(C)C)=O)N[C@H](CC(C=C3)=CC=C3O)C(N[C@@H](C(N[C@@H](C(N[C@@H](C(N2)=O)CC(C)C)=O)CC4=CC=CC=C4)=O)CC4=CC(C=CC=C5)=C5C=C4)=O	4.71	2.91.E-07	-6.54	80%	36.6
CHP64L	CHP64L_sub6_11	D-Pro	D-Tyr	D-Nal	D-Phe	D-Nal	D-Leu	915.104	914.4366	937.4264	937.7019	O=C([C@H]1CCCN1C([C@H]2CC(C)C)=O)N[C@H](CC(C=C3)=CC=C3O)C(N[C@@H](C(N[C@@H](C(N[C@@H](C(N2)=O)CC4=CC(C=CC=C5)=C5C=C4)=O)CC6=CC=CC=C6)=O)CC4=CC(C=CC=C5)=C5C=C4)=O	6.09	6.22.E-09	-8.21	112%	-18.2
CHP64L	CHP64L_sub6_12	D-Pro	D-Tyr	D-Nal	D-Phe	D-Thi	D-Leu	871.066	870.3774	893.3672	893.6321	O=C([C@H]1CCCN1C([C@H]2CC(C)C)=O)N[C@H](CC(C=C3)=CC=C3O)C(N[C@@H](C(N[C@@H](C(N[C@@H](C(N2)=O)CC4=CC=CS4)=O)CC5=CC=CC=C5)=O)CC4=CC(C=CC=C5)=C5C=C4)=O	5.08	1.12.E-07	-6.95	97%	5.8
CHP64L	CHP64L_sub6_13	D-Pro	D-Tyr	D-Nal	D-Phe(4F)	D-Ala	D-Leu	806.9364	806.3803	829.3701	829.5798	O=C([C@H]1CCCN1C([C@H]2CC(C)C)=O)N[C@H](CC(C=C3)=CC=C3O)C(N[C@@H](C(N[C@@H](C(N[C@@H](C(N2)=O)C)=O)CC4=CC=C(F)C=C4)=O)CC4=CC(C=CC=C5)=C5C=C4)=O	3.99	1.29.E-07	-6.89	85%	26.5
CHP64L	CHP64L_sub6_14	D-Pro	D-Tyr	D-Nal	D-Phe(4F)	D-Leu	D-Leu	849.0174	848.4272	871.417	871.646	O=C([C@H]1CCCN1C([C@H]2CC(C)C)=O)N[C@H](CC(C=C3)=CC=C3O)C(N[C@@H](C(N[C@@H](C(N[C@@H](C(N2)=O)CC(C)C)=O)CC4=CC=C(F)C=C4)=O)CC4=CC(C=CC=C5)=C5C=C4)=O	4.68	1.86.E-07	-6.73	98%	4
CHP64L	CHP64L_sub6_15	D-Pro	D-Tyr	D-Nal	D-Phe(4F)	D-Nal	D-Leu	933.0944	932.4272	955.417	955.7098	O=C([C@H]1CCCN1C([C@H]2CC(C)C)=O)N[C@H](CC(C=C3)=CC=C3O)C(N[C@@H](C(N[C@@H](C(N[C@@H](C(N2)=O)CC4=CC(C=CC=C5)=C5C=C4)=O)CC6=CC=C(F)C=C6)=O)CC4=CC(C=CC=C5)=C5C=C4)=O	5.99	9.67.E-09	-8.01	111%	-16.9
CHP64L	CHP64L_sub6_16	D-Pro	D-Tyr	D-Nal	D-Phe(4F)	D-Thi	D-Leu	889.0564	888.368	911.3578	911.6238	O=C([C@H]1CCCN1C([C@H]2CC(C)C)=O)N[C@H](CC(C=C3)=CC=C3O)C(N[C@@H](C(N[C@@H](C(N[C@@H](C(N2)=O)CC4=CC=CS4)=O)CC5=CC=C(F)C=C5)=O)CC4=CC(C=CC=C5)=C5C=C4)=O	5.11	4.43.E-08	-7.35	103%	-5.6
CHP64L	CHP64L_sub7_1	D-Pro	D-Tyr	D-Phe(4F)	D-Abu	D-Ala	D-Leu	694.8054	694.349	717.3388	717.5222	O=C([C@H]1CCCN1C([C@H]2CC(C)C)=O)N[C@H](CC(C=C3)=CC=C3O)C(N[C@@H](C(N[C@@H](C(N[C@@H](C(N2)=O)C)=O)CC)=O)CC4=CC=C(F)C=C4)=O	2.1	1.84.E-08	-7.74	102%	-3.1
CHP64L	CHP64L_sub7_2	D-Pro	D-Tyr	D-Phe(4F)	D-Abu	D-Leu	D-Leu	736.8864	736.3959	759.3857	759.5815	O=C([C@H]1CCCN1C([C@H]2CC(C)C)=O)N[C@H](CC(C=C3)=CC=C3O)C(N[C@@H](C(N[C@@H](C(N[C@@H](C(N2)=O)CC(C)C)=O)CC)=O)CC4=CC=C(F)C=C4)=O	2.66	3.33.E-08	-7.48	91%	16
CHP64L	CHP64L_sub7_3	D-Pro	D-Tyr	D-Phe(4F)	D-Abu	D-Nal	D-Leu	820.9634	820.3959	843.3857	843.625	O=C([C@H]1CCCN1C([C@H]2CC(C)C)=O)N[C@H](CC(C=C3)=CC=C3O)C(N[C@@H](C(N[C@@H](C(N[C@@H](C(N2)=O)CC4=CC(C=CC=C5)=C5C=C4)=O)CC)=O)CC4=CC=C(F)C=C4)=O	4.37	2.15.E-07	-6.67	38%	160.1
CHP64L	CHP64L_sub7_4	D-Pro	D-Tyr	D-Phe(4F)	D-Abu	D-Thi	D-Leu	776.9254	776.3367	799.3265	799.5489	O=C([C@H]1CCCN1C([C@H]2CC(C)C)=O)N[C@H](CC(C=C3)=CC=C3O)C(N[C@@H](C(N[C@@H](C(N[C@@H](C(N2)=O)CC4=CC=CS4)=O)CC)=O)CC4=CC=C(F)C=C4)=O	3.56	2.05.E-08	-7.69	52%	109.4
CHP64L	CHP64L_sub7_5	D-Pro	D-Tyr	D-Phe(4F)	D-Nva	D-Ala	D-Leu	708.8324	708.3647	731.3545	731.5438	O=C([C@H]1CCCN1C([C@H]2CC(C)C)=O)N[C@H](CC(C=C3)=CC=C3O)C(N[C@@H](C(N[C@@H](C(N[C@@H](C(N2)=O)C)=O)CCC)=O)CC4=CC=C(F)C=C4)=O	2.26	4.14.E-08	-7.38	97%	5.9
CHP64L	CHP64L_sub7_6	D-Pro	D-Tyr	D-Phe(4F)	D-Nva	D-Leu	D-Leu	750.9134	750.4116	773.4014	773.6019	O=C([C@H]1CCCN1C([C@H]2CC(C)C)=O)N[C@H](CC(C=C3)=CC=C3O)C(N[C@@H](C(N[C@@H](C(N[C@@H](C(N2)=O)CC(C)C)=O)CCC)=O)CC4=CC=C(F)C=C4)=O	3.11	1.26.E-07	-6.9	83%	30.6
CHP64L	CHP64L_sub7_7	D-Pro	D-Tyr	D-Phe(4F)	D-Nva	D-Nal	D-Leu	834.9904	834.4116	857.4014	857.6472	O=C([C@H]1CCCN1C([C@H]2CC(C)C)=O)N[C@H](CC(C=C3)=CC=C3O)C(N[C@@H](C(N[C@@H](C(N[C@@H](C(N2)=O)CC4=CC(C=CC=C5)=C5C=C4)=O)CCC)=O)CC4=CC=C(F)C=C4)=O	4.65	1.79.E-07	-6.75	51%	111.2
CHP64L	CHP64L_sub7_8	D-Pro	D-Tyr	D-Phe(4F)	D-Nva	D-Thi	D-Leu	790.9524	790.3524	813.3422	813.5564	O=C([C@H]1CCCN1C([C@H]2CC(C)C)=O)N[C@H](CC(C=C3)=CC=C3O)C(N[C@@H](C(N[C@@H](C(N[C@@H](C(N2)=O)CC4=CC=CS4)=O)CCC)=O)CC4=CC=C(F)C=C4)=O	3.74	4.92.E-08	-7.31	23%	243.5
CHP64L	CHP64L_sub7_9	D-Pro	D-Tyr	D-Phe(4F)	D-Phe	D-Ala	D-Leu	756.8764	756.3647	779.3545	779.5595	O=C([C@H]1CCCN1C([C@H]2CC(C)C)=O)N[C@H](CC(C=C3)=CC=C3O)C(N[C@@H](C(N[C@@H](C(N[C@@H](C(N2)=O)C)=O)CC4=CC=CC=C4)=O)CC4=CC=C(F)C=C4)=O	2.99	2.26.E-08	-7.65	98%	3.3
CHP64L	CHP64L_sub7_10	D-Pro	D-Tyr	D-Phe(4F)	D-Phe	D-Leu	D-Leu	798.9574	798.4116	821.4014	821.628	O=C([C@H]1CCCN1C([C@H]2CC(C)C)=O)N[C@H](CC(C=C3)=CC=C3O)C(N[C@@H](C(N[C@@H](C(N[C@@H](C(N2)=O)CC(C)C)=O)CC4=CC=CC=C4)=O)CC4=CC=C(F)C=C4)=O	3.62	2.82.E-07	-6.55	72%	53.8
CHP64L	CHP64L_sub7_11	D-Pro	D-Tyr	D-Phe(4F)	D-Phe	D-Nal	D-Leu	883.0344	882.4116	905.4014	905.6728	O=C([C@H]1CCCN1C([C@H]2CC(C)C)=O)N[C@H](CC(C=C3)=CC=C3O)C(N[C@@H](C(N[C@@H](C(N[C@@H](C(N2)=O)CC4=CC(C=CC=C5)=C5C=C4)=O)CC6=CC=CC=C6)=O)CC4=CC=C(F)C=C4)=O	5.2	7.66.E-08	-7.12	107%	-12
CHP64L	CHP64L_sub7_12	D-Pro	D-Tyr	D-Phe(4F)	D-Phe	D-Thi	D-Leu	838.9964	838.3524	861.3422	861.5963	O=C([C@H]1CCCN1C([C@H]2CC(C)C)=O)N[C@H](CC(C=C3)=CC=C3O)C(N[C@@H](C(N[C@@H](C(N[C@@H](C(N2)=O)CC4=CC=CS4)=O)CC5=CC=CC=C5)=O)CC4=CC=C(F)C=C4)=O	4.34	1.06.E-07	-6.98	58%	90.1
CHP64L	CHP64L_sub7_13	D-Pro	D-Tyr	D-Phe(4F)	D-Phe(4F)	D-Ala	D-Leu	774.8668	774.3553	797.3451	797.5535	O=C([C@H]1CCCN1C([C@H]2CC(C)C)=O)N[C@H](CC(C=C3)=CC=C3O)C(N[C@@H](C(N[C@@H](C(N[C@@H](C(N2)=O)C)=O)CC4=CC=C(F)C=C4)=O)CC4=CC=C(F)C=C4)=O	3.09	1.86.E-07	-6.73	99%	2.3
CHP64L	CHP64L_sub7_14	D-Pro	D-Tyr	D-Phe(4F)	D-Phe(4F)	D-Leu	D-Leu	816.9478	816.4022	839.392	839.6165	O=C([C@H]1CCCN1C([C@H]2CC(C)C)=O)N[C@H](CC(C=C3)=CC=C3O)C(N[C@@H](C(N[C@@H](C(N[C@@H](C(N2)=O)CC(C)C)=O)CC4=CC=C(F)C=C4)=O)CC4=CC=C(F)C=C4)=O	3.52	1.34.E-07	-6.87	67%	65.8
CHP64L	CHP64L_sub7_15	D-Pro	D-Tyr	D-Phe(4F)	D-Phe(4F)	D-Nal	D-Leu	901.0248	900.4022	923.392	923.6735	O=C([C@H]1CCCN1C([C@H]2CC(C)C)=O)N[C@H](CC(C=C3)=CC=C3O)C(N[C@@H](C(N[C@@H](C(N[C@@H](C(N2)=O)CC4=CC(C=CC=C5)=C5C=C4)=O)CC6=CC=C(F)C=C6)=O)CC4=CC=C(F)C=C4)=O	5.11	1.75.E-08	-7.76	107%	-11.7
CHP64L	CHP64L_sub7_16	D-Pro	D-Tyr	D-Phe(4F)	D-Phe(4F)	D-Thi	D-Leu	856.9868	856.343	879.3328	879.5917	O=C([C@H]1CCCN1C([C@H]2CC(C)C)=O)N[C@H](CC(C=C3)=CC=C3O)C(N[C@@H](C(N[C@@H](C(N[C@@H](C(N2)=O)CC4=CC=CS4)=O)CC5=CC=C(F)C=C5)=O)CC4=CC=C(F)C=C4)=O	4.25	5.52.E-08	-7.26	66%	70.2
CHP64L	CHP64L_sub8_1	D-Pro	D-Tyr	D-Thi	D-Abu	D-Ala	D-Leu	682.837	682.3148	705.3046	705.5162	O=C([C@H]1CCCN1C([C@H]2CC(C)C)=O)N[C@H](CC(C=C3)=CC=C3O)C(N[C@@H](C(N[C@@H](C(N[C@@H](C(N2)=O)C)=O)CC)=O)CC4=CC=CS4)=O	1.92	1.72.E-08	-7.77	114%	-21.1
CHP64L	CHP64L_sub8_2	D-Pro	D-Tyr	D-Thi	D-Abu	D-Leu	D-Leu	724.918	724.3617	747.3515	747.5762	O=C([C@H]1CCCN1C([C@H]2CC(C)C)=O)N[C@H](CC(C=C3)=CC=C3O)C(N[C@@H](C(N[C@@H](C(N[C@@H](C(N2)=O)CC(C)C)=O)CC)=O)CC4=CC=CS4)=O	2.51	5.01.E-08	-7.3	95%	7.7
CHP64L	CHP64L_sub8_3	D-Pro	D-Tyr	D-Thi	D-Abu	D-Nal	D-Leu	808.995	808.3617	831.3515	831.6207	O=C([C@H]1CCCN1C([C@H]2CC(C)C)=O)N[C@H](CC(C=C3)=CC=C3O)C(N[C@@H](C(N[C@@H](C(N[C@@H](C(N2)=O)CC4=CC(C=CC=C5)=C5C=C4)=O)CC)=O)CC4=CC=CS4)=O	4.37	2.59.E-07	-6.59	28%	211.1
CHP64L	CHP64L_sub8_4	D-Pro	D-Tyr	D-Thi	D-Abu	D-Thi	D-Leu	764.957	764.3025	787.2923	787.5406	O=C([C@H]1CCCN1C([C@H]2CC(C)C)=O)N[C@H](CC(C=C3)=CC=C3O)C(N[C@@H](C(N[C@@H](C(N[C@@H](C(N2)=O)CC4=CC=CS4)=O)CC)=O)CC4=CC=CS4)=O	3.04	7.41.E-08	-7.13	56%	96.7
CHP64L	CHP64L_sub8_5	D-Pro	D-Tyr	D-Thi	D-Nva	D-Ala	D-Leu	696.864	696.3305	719.3203	719.5436	O=C([C@H]1CCCN1C([C@H]2CC(C)C)=O)N[C@H](CC(C=C3)=CC=C3O)C(N[C@@H](C(N[C@@H](C(N[C@@H](C(N2)=O)C)=O)CCC)=O)CC4=CC=CS4)=O	2.27	4.09.E-08	-7.39	92%	14.4
CHP64L	CHP64L_sub8_6	D-Pro	D-Tyr	D-Thi	D-Nva	D-Leu	D-Leu	738.945	738.3774	761.3672	761.5974	O=C([C@H]1CCCN1C([C@H]2CC(C)C)=O)N[C@H](CC(C=C3)=CC=C3O)C(N[C@@H](C(N[C@@H](C(N[C@@H](C(N2)=O)CC(C)C)=O)CCC)=O)CC4=CC=CS4)=O	2.88	1.88.E-07	-6.73	85%	27
CHP64L	CHP64L_sub8_7	D-Pro	D-Tyr	D-Thi	D-Nva	D-Nal	D-Leu	823.022	822.3774	845.3672	845.6393	O=C([C@H]1CCCN1C([C@H]2CC(C)C)=O)N[C@H](CC(C=C3)=CC=C3O)C(N[C@@H](C(N[C@@H](C(N[C@@H](C(N2)=O)CC4=CC(C=CC=C5)=C5C=C4)=O)CCC)=O)CC4=CC=CS4)=O	4.54	1.67.E-07	-6.78	39%	156.8
CHP64L	CHP64L_sub8_8	D-Pro	D-Tyr	D-Thi	D-Nva	D-Thi	D-Leu	778.984	778.3182	801.308	801.5521	O=C([C@H]1CCCN1C([C@H]2CC(C)C)=O)N[C@H](CC(C=C3)=CC=C3O)C(N[C@@H](C(N[C@@H](C(N[C@@H](C(N2)=O)CC4=CC=CS4)=O)CCC)=O)CC4=CC=CS4)=O	3.32	1.49.E-07	-6.83	31%	195
CHP64L	CHP64L_sub8_9	D-Pro	D-Tyr	D-Thi	D-Phe	D-Ala	D-Leu	744.908	744.3305	767.3203	767.562	O=C([C@H]1CCCN1C([C@H]2CC(C)C)=O)N[C@H](CC(C=C3)=CC=C3O)C(N[C@@H](C(N[C@@H](C(N[C@@H](C(N2)=O)C)=O)CC4=CC=CC=C4)=O)CC4=CC=CS4)=O	2.97	9.07.E-09	-8.04	101%	-1.3
CHP64L	CHP64L_sub8_10	D-Pro	D-Tyr	D-Thi	D-Phe	D-Leu	D-Leu	786.989	786.3774	809.3672	809.6215	O=C([C@H]1CCCN1C([C@H]2CC(C)C)=O)N[C@H](CC(C=C3)=CC=C3O)C(N[C@@H](C(N[C@@H](C(N[C@@H](C(N2)=O)CC(C)C)=O)CC4=CC=CC=C4)=O)CC4=CC=CS4)=O	3.31	3.34.E-07	-6.48	77%	42.9
CHP64L	CHP64L_sub8_11	D-Pro	D-Tyr	D-Thi	D-Phe	D-Nal	D-Leu	871.066	870.3774	893.3672	893.6712	O=C([C@H]1CCCN1C([C@H]2CC(C)C)=O)N[C@H](CC(C=C3)=CC=C3O)C(N[C@@H](C(N[C@@H](C(N[C@@H](C(N2)=O)CC4=CC(C=CC=C5)=C5C=C4)=O)CC6=CC=CC=C6)=O)CC4=CC=CS4)=O	5.07	4.76.E-08	-7.32	92%	13.2
CHP64L	CHP64L_sub8_12	D-Pro	D-Tyr	D-Thi	D-Phe	D-Thi	D-Leu	827.028	826.3182	849.308	849.5944	O=C([C@H]1CCCN1C([C@H]2CC(C)C)=O)N[C@H](CC(C=C3)=CC=C3O)C(N[C@@H](C(N[C@@H](C(N[C@@H](C(N2)=O)CC4=CC=CS4)=O)CC5=CC=CC=C5)=O)CC4=CC=CS4)=O	4.02	1.48.E-07	-6.83	47%	125
CHP64L	CHP64L_sub8_13	D-Pro	D-Tyr	D-Thi	D-Phe(4F)	D-Ala	D-Leu	762.8984	762.3211	785.3109	785.5519	O=C([C@H]1CCCN1C([C@H]2CC(C)C)=O)N[C@H](CC(C=C3)=CC=C3O)C(N[C@@H](C(N[C@@H](C(N[C@@H](C(N2)=O)C)=O)CC4=CC=C(F)C=C4)=O)CC4=CC=CS4)=O	3.28	9.24.E-09	-8.03	101%	-1.3
CHP64L	CHP64L_sub8_14	D-Pro	D-Tyr	D-Thi	D-Phe(4F)	D-Leu	D-Leu	804.9794	804.368	827.3578	827.6124	O=C([C@H]1CCCN1C([C@H]2CC(C)C)=O)N[C@H](CC(C=C3)=CC=C3O)C(N[C@@H](C(N[C@@H](C(N[C@@H](C(N2)=O)CC(C)C)=O)CC4=CC=C(F)C=C4)=O)CC4=CC=CS4)=O	3.51	1.93.E-07	-6.71	72%	53.8
CHP64L	CHP64L_sub8_15	D-Pro	D-Tyr	D-Thi	D-Phe(4F)	D-Nal	D-Leu	889.0564	888.368	911.3578	911.674	O=C([C@H]1CCCN1C([C@H]2CC(C)C)=O)N[C@H](CC(C=C3)=CC=C3O)C(N[C@@H](C(N[C@@H](C(N[C@@H](C(N2)=O)CC4=CC(C=CC=C5)=C5C=C4)=O)CC6=CC=C(F)C=C6)=O)CC4=CC=CS4)=O	5.12	3.59.E-09	-8.45	108%	-12.9
CHP64L	CHP64L_sub8_16	D-Pro	D-Tyr	D-Thi	D-Phe(4F)	D-Thi	D-Leu	845.0184	844.3088	867.2986	867.5883	O=C([C@H]1CCCN1C([C@H]2CC(C)C)=O)N[C@H](CC(C=C3)=CC=C3O)C(N[C@@H](C(N[C@@H](C(N[C@@H](C(N2)=O)CC4=CC=CS4)=O)CC5=CC=C(F)C=C5)=O)CC4=CC=CS4)=O	4.17	1.48.E-07	-6.83	61%	82.6
